# Supplementary material
Source: PubMed Central journal article supplement (PMC4502420)
Supplement: NIHMS365049-supplement-Supp.pdf [file NIHMS365049-supplement-Supp.pdf]

Supporting Information

© Wiley-VCH 2012

69451 Weinheim, Germany

**An Efficient Computational Model to Predict the Synthetic Utility of Heterocyclic Arynes\*\***

*Adam E. Goetz, Sarah M. Bronner, Jordan D. Cisneros, Joshua M. Melamed, Robert S. Paton,\*  
K. N. Houk,\* and Neil K. Garg\**

anie\_201108863\_sm\_miscellaneous\_information.pdf

Supporting Information – Table of Contents

|                                                                       |            |
|-----------------------------------------------------------------------|------------|
| <b>Materials and Methods</b> .....                                    | <b>S2</b>  |
| <b>Additional Published Hetaryne Examples</b> .....                   | <b>S3</b>  |
| <b>Selected Energy Calculations using DFT (M06/6-311+G**)</b> .....   | <b>S4</b>  |
| <b>Sample Calculation Setup</b> .....                                 | <b>S5</b>  |
| <b>Energies and Key Angles of Calculated Structures</b> .....         | <b>S8</b>  |
| <b>A. Benzene derived arynes</b> .....                                | <b>S8</b>  |
| <b>B. 6,5-bicyclic hetarynes (aryne outside of heterocycle)</b> ..... | <b>S8</b>  |
| <b>C. 6,6-bicyclic hetarynes (aryne outside of heterocycle)</b> ..... | <b>S13</b> |
| <b>D. Other hetarynes (aryne within heterocycle)</b> .....            | <b>S15</b> |
| <b>E. Selected Energies using MP2/6-311+G**</b> .....                 | <b>S22</b> |
| <b>Coordinates of Computed Structures</b> .....                       | <b>S28</b> |
| <b>A. Structures using B3LYP/6-31G*</b> .....                         | <b>S28</b> |
| <b>B. Structures using MP2/6-311+G**</b> .....                        | <b>S81</b> |
| <b>References</b> .....                                               | <b>S91</b> |

## Materials and Methods.

All computations were carried out using Spartan '06 for Mac<sup>1</sup> unless otherwise noted. All structures were minimized using Molecular Mechanics, and then further minimized using Density Functional Theory B3LYP/6–31G\*.

Literature references for various computational methods are as follows:

B3LYP: a) A. D. Becke, *J. Chem. Phys.* **1993**, 98, 5648; b) C. Lee, W. Yang, R. G. Parr, *Phys. Rev. B* **1988**, 37, 785; c) S. H. Vosko, L. Wilk, M. Nusair, *Can. J. Phys.* **1980**, 58, 1200; d) P. J. Stephens, F. J. Devlin, C. F. Chabalowski, M. J. Frisch, *J. Phys. Chem.* **1994**, 98, 11623.

MP2: a) C. Møller, M. S. Plesset, *Phys. Rev.* **1934**, 46, 618; b) M. Head-Gordon, J. A. Pople, and M. J. Frisch, *Chem. Phys. Lett.* **1988**, 153, 503.

M06-2X: Y. Zhao, D. G. Truhlar, *Theor. Chem. Acc.* **2008**, 120, 215.

SF-CCSD: A. I. Krylov, *Chem. Phys. Lett.* **2001**, 350, 522.

*Note:* Although the use of hybrid-GGA density functionals such as B3LYP is commonplace throughout organic chemistry, reaction energies are often predicted with errors of the order of 6–8 kcal/mol.<sup>2</sup> Grimme and others have shown that the incorporation of dispersion corrections can partially mitigate these errors and are essential for greater quantitative accuracy with DFT calculations. In the current work, while we would expect the absolute reaction energies to alter upon the inclusion of a dispersion correction, the relative aryne stabilities would likely remain unchanged leaving our conclusions unaltered.

## Additional Published Hetaryne Examples

## 2,3-pyridyne-N-oxide

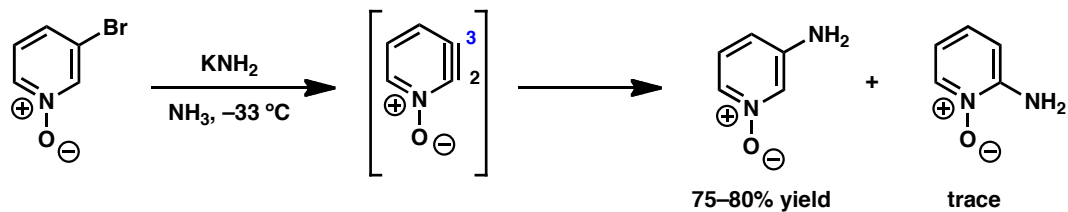

Martens, R. J.; den Hertog, H. J. *Rec. Trav. Chim. Pays-Bas* **1967**, *86*, 655–669.

## 4,5-benzofurazanyne

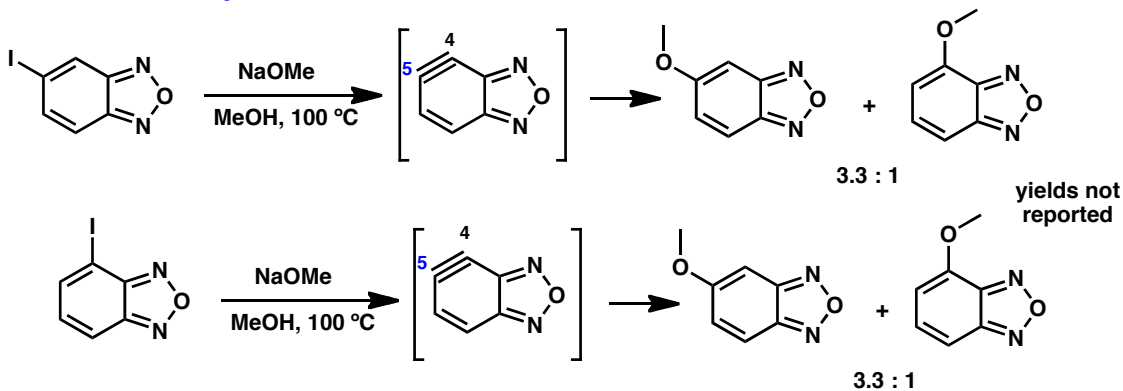

Di Nunno, L.; Florio, S.; Todesco, P. E. *J. Chem. Soc., Perkin Trans. II* **1974**, 1171–1175.

## 1,2-dibenzofuranyne

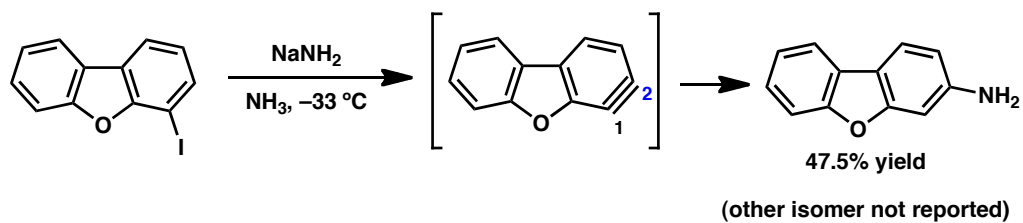

Gilman, H.; Avakian, S. *J. Am. Chem. Soc.* **1945**, *67*, 349–351.

## Select Energy Calculations using DFT (M06/6-311+G\*\*)

The energies of hetarynes from Figure 2 were computed in Spartan '10<sup>3</sup> using Density Functional Theory (M06/6-311+G\*\*) from the previously minimized structures used throughout the manuscript. While there are small differences (typically ~ 2 kcal/mol) in the absolute energies, in all cases the hetarynes still fall into the same categories as outlined in Figure 2 in the accompanying manuscript.

**computed using DFT M06/6-311+G\*\***

**Hetarynes and aryne that can be generated (all validated experimentally)**

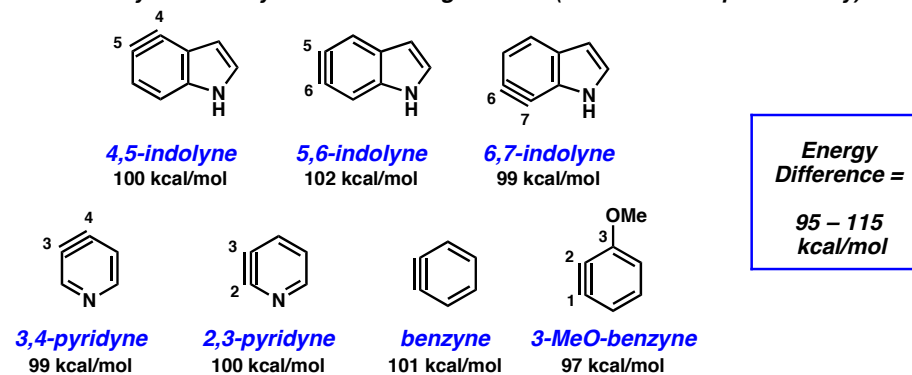

**Hetarynes that can likely be generated (3,4-thiophyne validated experimentally)**

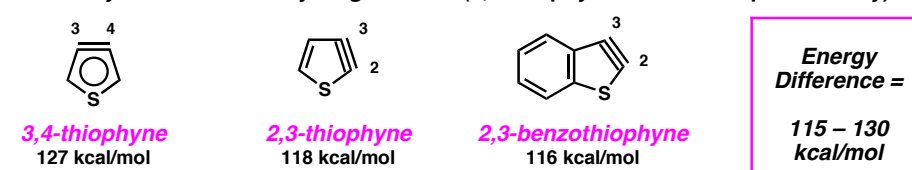

**Hetarynes that likely cannot be generated**

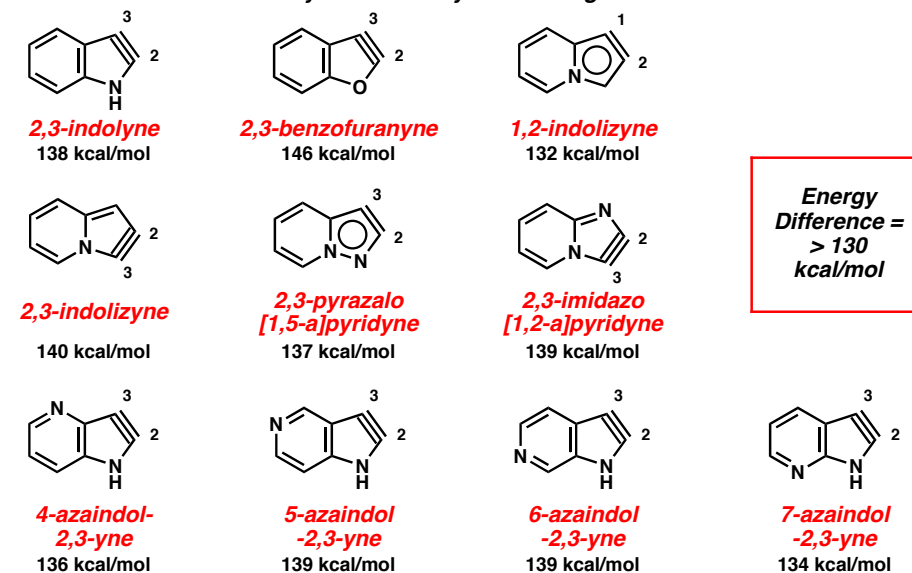

|                                                                  |   |                                                                             |
|------------------------------------------------------------------|---|-----------------------------------------------------------------------------|
| energy difference or<br>energy of dehydrogenation<br>in kcal/mol | = | (energy of aryne + energy of H <sub>2</sub> )<br>– (energy of parent arene) |
|------------------------------------------------------------------|---|-----------------------------------------------------------------------------|

## Sample Calculation Setup.

*Note to user: The following section provides a simple guide for setting up hetaryne calculations. However, users should have some basic understanding of computational chemistry in order to conduct and interpret such computations.*

### Predicting the Preferred Site of Attack on an Aryne

1) Construct the parent arene in Spartan. Connect the two adjacent carbons using the “**make bond**” button by clicking the adjacent yellow connection points.

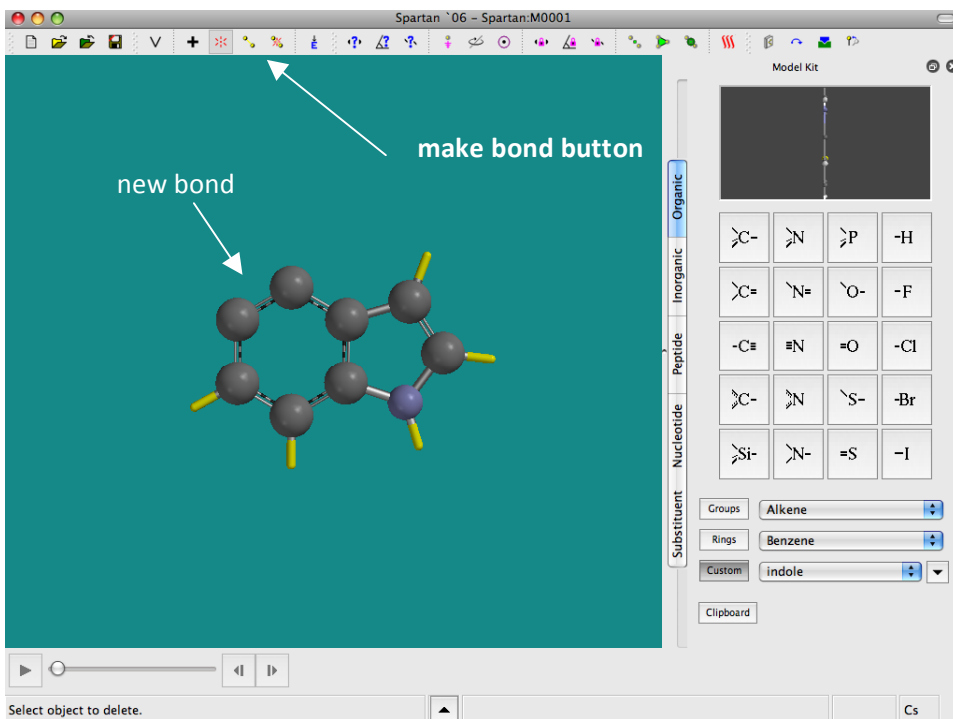

2) Perform an energy minimization by clicking the

**E** “**minimize**” button.

3) Start the calculation by choosing “Setup” followed by “Calculations”

4) Calculate “**Equilibrium Geometry**” at “**Ground**” state with “**Density Functional/B3LYP/6-31G\***”. Everything else should already be setup properly.

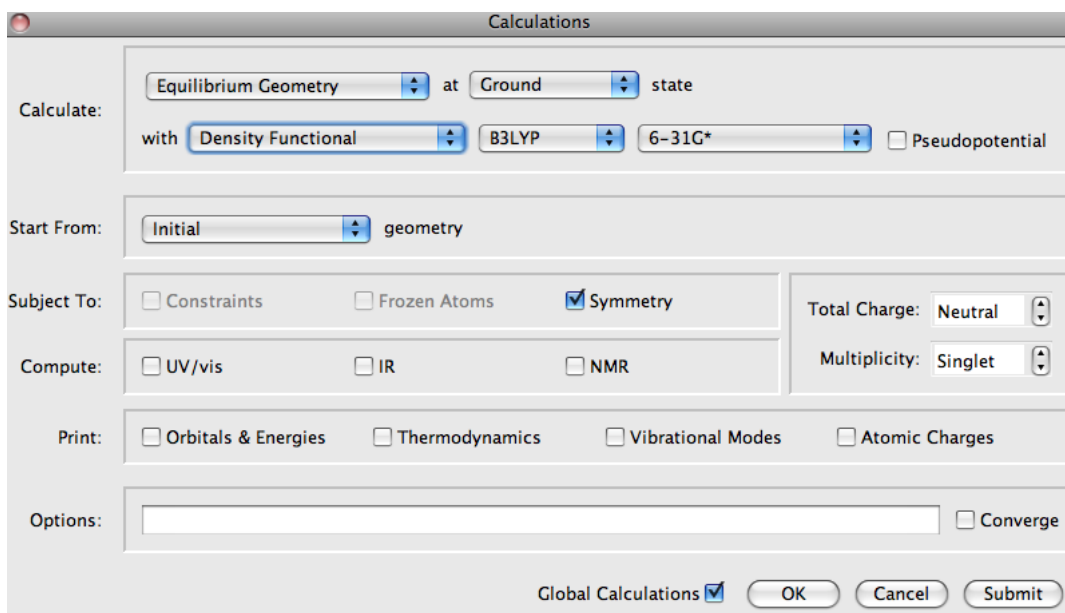

5) Click “**submit**” and create a file name for the molecule.

6) After the computation has finished, measure the angles, using the “**Measure Angle**” button. Click 3 adjacent atoms in order to measure the angle of the central atom.

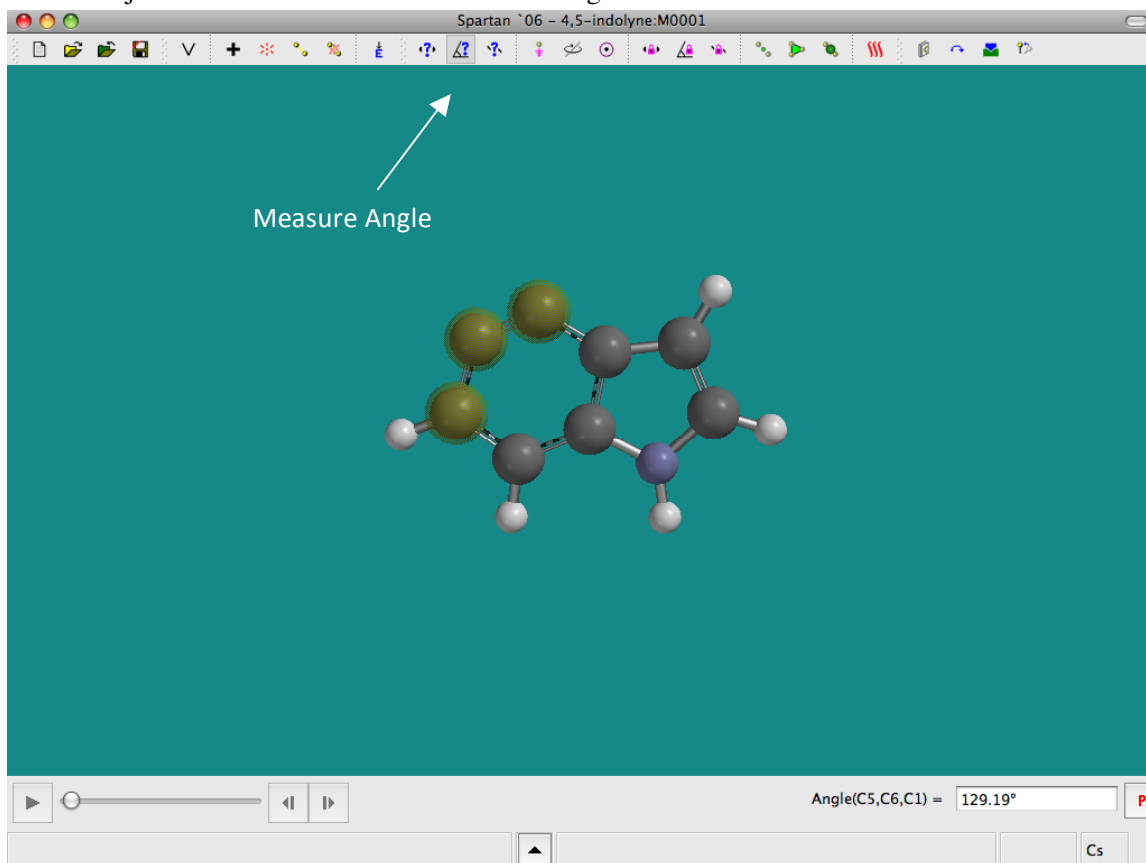

7) Compare the two termini of the aryne to find the larger angle.

### Calculating the Dehydrogenation Energy of the Aryne

- 1) To calculate the dehydrogenation energy, you must first model the aryne in question, the parent arene (i.e. indole to correspond to 4,5-indolyne) and hydrogen ( $H_2$ ).
- 2) After these calculations are all complete, obtain the energy of each species by choosing “**Output**” under the “**Display**” menu
- 3) Scroll through the output until you see a section with the heading “**Optimization**”. This contains a series of “steps” as well as energies for each step. The energy that corresponds to the bottom “step” is the desired energy.

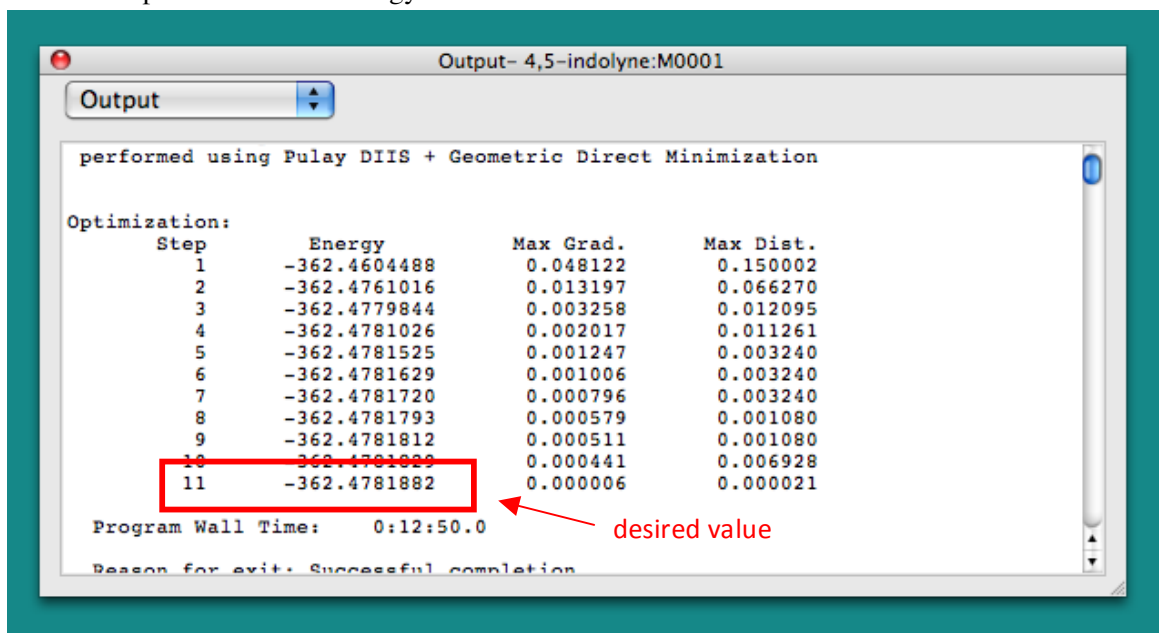

- 4) After obtaining the value from each calculation (aryne, arene, and  $H_2$ ), they must be converted from their given units (Hartrees) to kcal/mol. The conversion for this is 1 Hartree = 627.51 kcal/mol.
- 5) The dehydrogenation energy is calculated as (Energy of aryne + Energy of  $H_2$ ) – (Energy of arene). This should give a positive value. Higher values correspond to less stable arynes.



### Energies and Key Angles of Calculated Structures.

The dehydrogenation energy (kcal/mol) was obtained by calculating (energy of aryne + energy of H<sub>2</sub>) – (energy of parent arene). The energy differences relative to that of *o*-benzyne are also shown as the Standardized Energy. Positive standardized energies correspond to arynes that are higher in energy compared to *o*-benzyne. Standardized energies that are negative are predicted to be lower in energy than *o*-benzyne.

Structures marked with a (\*) are included in the accompanying communication.

#### A. Benzene derived arynes

| Structure                                                                                    | Energy (hartrees) | Energy (kcal/mol) | Dehydrogenation Energy (kcal/mol) | Standardized Energy (kcal/mol) | Larger Terminus | Smaller Terminus | Angle Difference |
|----------------------------------------------------------------------------------------------|-------------------|-------------------|-----------------------------------|--------------------------------|-----------------|------------------|------------------|
| H–H<br>SI-1                                                                                  | -1.17548          | -737.6            |                                   |                                |                 |                  |                  |
| <br>SI-2    | -232.2507         | -145739.6         |                                   |                                |                 |                  |                  |
| <br>SI-3*  | -230.90996        | -144898.3         | 103.7                             | 0.0                            | 127.1<br>(N/A)  | 127.1<br>(N/A)   | 0.0              |
| <br>SI-4  | -346.7714         | -217602.5         |                                   |                                |                 |                  |                  |
| <br>SI-5* | -345.4388         | -216766.3         | 98.6                              | -5.1                           | 134.90<br>(C1)  | 119.2<br>(C2)    | 15.7             |

#### B. 6,5-bicyclic hetarynes (aryne outside of heterocycle)

| Structure                                                                                    | Energy (hartrees) | Energy (kcal/mol) | Dehydrogenation Energy (kcal/mol) | Standardized Energy (kcal/mol) | Larger Terminus | Smaller Terminus | Angle Difference |
|----------------------------------------------------------------------------------------------|-------------------|-------------------|-----------------------------------|--------------------------------|-----------------|------------------|------------------|
| <br>SI-6  | -363.8167         | -228298.6         |                                   |                                |                 |                  |                  |
| <br>SI-7* | -362.4782         | -227458.7         | 102.3                             | -1.4                           | 129.2<br>(C5)   | 125.1<br>(C4)    | 4.1              |
| <br>SI-8* | -362.4754         | -227456.9         | 104.1                             | 0.4                            | 130.0<br>(C5)   | 126.8<br>(C6)    | 3.2              |

|                                                                                                     |           |           |       |      |               |               |      |
|-----------------------------------------------------------------------------------------------------|-----------|-----------|-------|------|---------------|---------------|------|
| 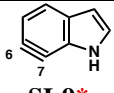<br><b>SI-9*</b>   | -362.4797 | -227459.6 | 101.4 | -2.3 | 134.7<br>(C6) | 117.4<br>(C7) | 17.3 |
| <br><b>SI-10</b>   | -383.6734 | -240758.9 |       |      |               |               |      |
| <br><b>SI-11*</b>  | -382.3329 | -239917.7 | 103.6 | -0.1 | 130.6<br>(C5) | 123.3<br>(C4) | 7.3  |
| <br><b>SI-12*</b>  | -382.3317 | -239917.0 | 104.3 | 0.6  | 129.7<br>(C5) | 127.4<br>(C6) | 2.3  |
| <br><b>SI-13*</b>  | -382.3341 | -239918.5 | 102.8 | -0.9 | 135.5<br>(C6) | 115.8<br>(C7) | 19.7 |
| <br><b>SI-14</b>   | -379.8661 | -238369.8 |       |      |               |               |      |
| <br><b>SI-15</b>   | -378.5264 | -237529.1 | 103.0 | -0.6 | 131.4<br>(C5) | 122.1<br>(C4) | 9.3  |
| <br><b>SI-16</b>  | -378.525  | -237528.2 | 103.9 | 0.2  | 130.4<br>(C5) | 127.1<br>(C6) | 3.3  |
| <br><b>SI-17</b> | -378.5278 | -237530.0 | 102.2 | -1.5 | 135.5<br>(C6) | 116.2<br>(C7) | 19.3 |
| <br><b>SI-18</b> | -399.7232 | -250830.3 |       |      |               |               |      |
| <br><b>SI-19</b> | -398.3816 | -249988.4 | 104.2 | 0.5  | 132.5<br>(C5) | 120.4<br>(C4) | 12.1 |
| <br><b>SI-20</b> | -398.3817 | -249988.5 | 104.2 | 0.5  | 129.9<br>(C5) | 127.8<br>(C6) | 2.10 |
| <br><b>SI-21</b> | -398.3827 | -249989.1 | 103.6 | -0.1 | 136.4<br>(C6) | 114.4<br>(C7) | 22.0 |
| <br><b>SI-22</b> | -379.8436 | -238355.7 |       |      |               |               |      |
| <br><b>SI-23</b> | -378.5034 | -237514.7 | 103.4 | -0.3 | 129.8<br>(C5) | 123.7<br>(C4) | 6.1  |

|                                                                                                      |           |           |       |      |               |               |      |
|------------------------------------------------------------------------------------------------------|-----------|-----------|-------|------|---------------|---------------|------|
| 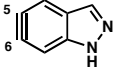<br><b>SI-24</b>    | -378.5009 | -237513.1 | 104.9 | 1.2  | 129.5<br>(C5) | 128.0<br>(C6) | 1.5  |
| <br><b>SI-25</b>    | -378.5057 | -237516.1 | 101.9 | -1.8 | 135.2<br>(C6) | 116.8<br>(C7) | 18.4 |
| <br><b>SI-26</b>    | -399.6831 | -250805.1 |       |      |               |               |      |
| <br><b>SI-27</b>    | -398.3405 | -249962.6 | 104.9 | 1.2  | 131.3<br>(C5) | 121.4<br>(C4) | 9.9  |
| <br><b>SI-28</b>    | -398.3398 | -249962.2 | 105.3 | 1.6  | 128.9<br>(C6) | 128.7<br>(C5) | 0.20 |
| <br><b>SI-29</b>    | -398.3425 | -249963.9 | 103.6 | -0.1 | 135.8<br>(C6) | 115.7<br>(C7) | 20.1 |
| <br><b>SI-30</b>    | -395.8672 | -248410.6 |       |      |               |               |      |
| <br><b>SI-31*</b>  | -394.5256 | -247568.8 | 104.2 | 0.5  | 131.8<br>(C5) | 120.9<br>(C4) | 10.9 |
| <br><b>SI-32*</b> | -394.5243 | -247567.9 | 105.1 | 1.4  | 129.9<br>(C5) | 128.3<br>(C6) | 1.6  |
| <br><b>SI-33*</b> | -394.5272 | -247569.8 | 103.2 | -0.5 | 135.7<br>(C6) | 115.9<br>(C7) | 19.8 |
| <br><b>SI-34</b>  | -415.7125 | -260863.8 |       |      |               |               |      |
| <br><b>SI-35</b>  | -414.3691 | -260020.8 | 105.4 | 1.7  | 133.9<br>(C5) | 117.6<br>(C4) | 16.3 |
| <br><b>SI-36</b>  | -414.3689 | -260020.6 | 105.5 | 1.8  | 129.9<br>(C6) | 128.4<br>(C5) | 1.5  |
| <br><b>SI-37</b>  | -414.3701 | -260021.4 | 104.7 | 1.0  | 135.9<br>(C6) | 116.3<br>(C7) | 19.6 |
| <br><b>SI-38</b>  | -706.6536 | -443432.2 |       |      |               |               |      |
| <br><b>SI-39</b>  | -705.3153 | -442592.4 | 102.2 | -1.5 | 129.0<br>(C5) | 125.6<br>(C4) | 3.4  |

|                                                                                                     |           |           |       |      |               |               |      |
|-----------------------------------------------------------------------------------------------------|-----------|-----------|-------|------|---------------|---------------|------|
| 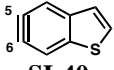<br><b>SI-40</b>   | -705.3118 | -442590.2 | 104.4 | 0.7  | 130.0<br>(C5) | 126.8<br>(C6) | 3.2  |
| <br><b>SI-41</b>   | -705.3146 | -442592.0 | 102.6 | -1.1 | 131.7<br>(C6) | 121.4<br>(C7) | 10.3 |
| <br><b>SI-42</b>   | -363.8019 | -228289.3 |       |      |               |               |      |
| <br><b>SI-43</b>   | -362.4668 | -227451.5 | 100.2 | -3.5 | 129.9<br>(C5) | 124.3<br>(C4) | 5.6  |
| <br><b>SI-44</b>   | -383.6504 | -240744.5 |       |      |               |               |      |
| <br><b>SI-45</b>   | -382.3143 | -239906.0 | 100.8 | -2.9 | 130.7<br>(C5) | 123.3<br>(C4) | 7.4  |
| <br><b>SI-46</b>   | -706.6357 | -443421.0 |       |      |               |               |      |
| <br><b>SI-47</b>   | -705.3003 | -442583.0 | 100.4 | -3.3 | 130.1<br>(C5) | 124.6<br>(C4) | 5.5  |
| <br><b>SI-48</b> | -857.0075 | -537780.8 |       |      |               |               |      |
| <br><b>SI-49</b> | -855.6661 | -536939.0 | 104.1 | 0.4  | 129.9<br>(C5) | 124.3<br>(C4) | 5.6  |
| <br><b>SI-50</b> | -855.665  | -536938.3 | 104.8 | 1.1  | 128.0<br>(C6) | 127.6<br>(C5) | 0.4  |
| <br><b>SI-51</b> | -855.6624 | -536936.7 | 106.4 | 2.7  | 131.1<br>(C6) | 121.3<br>(C7) | 9.8  |
| <br><b>SI-52</b> | -722.6996 | -453501.2 |       |      |               |               |      |
| <br><b>SI-53</b> | -721.3600 | -452660.6 | 103.0 | -0.7 | 131.1<br>(C5) | 123.1<br>(C4) | 8.0  |
| <br><b>SI-54</b> | -721.3576 | -452659.1 | 104.5 | 0.8  | 128.7<br>(C5) | 128.0<br>(C6) | 0.7  |
| <br><b>SI-55</b> | -721.36   | -452660.6 | 103.0 | -0.7 | 132.6<br>(C6) | 120.5<br>(C7) | 12.1 |

|                                                                                                     |           |           |       |      |                |                |      |
|-----------------------------------------------------------------------------------------------------|-----------|-----------|-------|------|----------------|----------------|------|
| 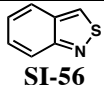<br><b>SI-56</b>   | -722.6759 | -453486.4 |       |      |                |                |      |
| <br><b>SI-57</b>   | -721.3389 | -452647.4 | 101.4 | -2.3 | 130.4<br>(C5)  | 123.8<br>(C4)  | 6.6  |
| <br><b>SI-58</b>   | -721.3336 | -452644.0 | 104.7 | 1.0  | 130.4<br>(C6)  | 128.6<br>(C5)  | 1.8  |
| <br><b>SI-59</b>   | -721.3395 | -452647.7 | 101.0 | -2.7 | 131.9<br>(C6)  | 122.7<br>(C7)  | 9.2  |
| <br><b>SI-60</b>   | -722.6891 | -453494.6 |       |      |                |                |      |
| <br><b>SI-61</b>   | -721.3491 | -452653.8 | 103.2 | -0.5 | 130.1<br>(C5)  | 123.6<br>(C4)  | 6.5  |
| <br><b>SI-62</b>   | -721.346  | -452651.8 | 105.2 | 1.5  | 128.3<br>(N/A) | 128.3<br>(N/A) | 0.0  |
| <br><b>SI-63</b>   | -721.3492 | -452653.8 | 103.2 | -0.5 | 132.1<br>(C6)  | 121.1<br>(C7)  | 11.0 |
| <br><b>SI-64</b>  | -399.6653 | -250794.0 |       |      |                |                |      |
| <br><b>SI-65</b> | -398.3266 | -249953.9 | 102.4 | -1.3 | 131.2<br>(C5)  | 121.9<br>(C4)  | 9.3  |
| <br><b>SI-66</b> | -398.3221 | -249951.1 | 105.2 | 1.6  | 130.9<br>(C6)  | 128.8<br>(C5)  | 2.1  |
| <br><b>SI-67</b> | -398.3274 | -249954.4 | 101.9 | -1.8 | 132.8<br>(C6)  | 120.7<br>(C7)  | 12.1 |
| <br><b>SI-68</b> | -415.678  | -260842.1 |       |      |                |                |      |
| <br><b>SI-69</b> | -414.3375 | -260000.9 | 103.6 | -0.1 | 133.9<br>(C5)  | 119.5<br>(C4)  | 14.4 |
| <br><b>SI-70</b> | -517.4707 | -324718.0 |       |      |                |                |      |
| <br><b>SI-71</b> | -516.1333 | -323878.8 | 101.6 | -2.1 | 134.5<br>(C2)  | 118.0<br>(C1)  | 16.5 |

|                                                                                                     |           |           |       |      |               |               |      |
|-----------------------------------------------------------------------------------------------------|-----------|-----------|-------|------|---------------|---------------|------|
| <br><b>SI-72</b>   | -516.1291 | -323876.2 | 104.2 | 0.5  | 128.9<br>(C3) | 127.4<br>(C2) | 1.5  |
| <br><b>SI-73</b>   | -516.131  | -323877.4 | 103.0 | -0.6 | 129.5<br>(C3) | 124.4<br>(C4) | 5.1  |
| <br><b>SI-74</b>   | -537.3291 | -337179.4 |       |      |               |               |      |
| <br><b>SI-75</b>   | -535.9896 | -336338.8 | 102.9 | -0.8 | 135.3<br>(C2) | 116.4<br>(C1) | 18.9 |
| <br><b>SI-76</b>   | -535.9873 | -336337.4 | 104.4 | 0.7  | 129.1<br>(C3) | 127.7<br>(C2) | 1.40 |
| <br><b>SI-77</b>   | -535.9881 | -336337.9 | 103.9 | 0.2  | 130.6<br>(C3) | 123.1<br>(C4) | 7.5  |
| <br><b>SI-78</b>  | -860.3069 | -539851.2 |       |      |               |               |      |
| <br><b>SI-79</b> | -858.9674 | -539010.6 | 102.9 | -0.8 | 131.6<br>(C2) | 121.5<br>(C1) | 10.1 |
| <br><b>SI-80</b> | -858.9648 | -539009.0 | 104.6 | 0.9  | 129.1<br>(C3) | 127.7<br>(C2) | 1.4  |
| <br><b>SI-81</b> | -858.9687 | -539011.4 | 102.1 | -1.6 | 130.6         | 123.1         | 7.5  |

### C. 6,6-bicyclic hetarynes (aryne outside of heterocycle)

| Structure                                                                                            | Energy (hartrees) | Energy (kcal/mol) | Dehydrogenation Energy (kcal/mol) | Standardized Energy (kcal/mol) | Larger Terminus | Smaller Terminus | Angle Difference |
|------------------------------------------------------------------------------------------------------|-------------------|-------------------|-----------------------------------|--------------------------------|-----------------|------------------|------------------|
| 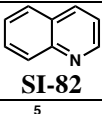<br><b>SI-82</b>  | -401.9308         | -252215.6         |                                   |                                |                 |                  |                  |
| <br><b>SI-83*</b> | -400.5933         | -251376.3         | 101.7                             | -2.0                           | 128.4<br>(C6)   | 126.4<br>(C5)    | 2.0              |
| <br><b>SI-84*</b> | -400.5898         | -251374.1         | 103.9                             | 0.2                            | 128.7<br>(C7)   | 127.5<br>(C6)    | 1.2              |

|                                                                                                      |           |           |       |      |                |                |      |
|------------------------------------------------------------------------------------------------------|-----------|-----------|-------|------|----------------|----------------|------|
| 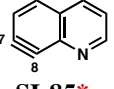<br><b>SI-85*</b>   | -400.5932 | -251376.2 | 101.7 | -2.0 | 128.4<br>(C7)  | 126.8<br>(C8)  | 1.6  |
| <br><b>SI-86</b>    | -401.9291 | -252214.5 |       |      |                |                |      |
| <br><b>SI-87</b>    | -400.5917 | -251375.3 | 101.6 | -2.1 | 128.6<br>(C6)  | 126.4<br>(C5)  | 2.2  |
| <br><b>SI-88</b>    | -400.5885 | -251373.3 | 103.6 | -0.1 | 128.1<br>(N/A) | 128.1<br>(N/A) | 0.00 |
| <br><b>SI-89</b>    | -400.5906 | -251374.6 | 102.3 | -1.4 | 128.5<br>(C7)  | 125.8<br>(C8)  | 2.7  |
| <br><b>SI-90</b>    | -417.9343 | -262258.0 |       |      |                |                |      |
| <br><b>SI-91</b>    | -416.5944 | -261417.2 | 103.2 | -0.5 | 129.2<br>(C6)  | 124.9<br>(C5)  | 4.3  |
| <br><b>SI-92</b>   | -417.9650 | -262277.2 |       |      |                |                |      |
| <br><b>SI-93</b>  | -416.6269 | -261437.5 | 102.0 | -1.6 | 129.2<br>(C6)  | 125.7<br>(C5)  | 3.5  |
| <br><b>SI-94</b>  | -417.9321 | -262256.6 |       |      |                |                |      |
| <br><b>SI-95</b>  | -416.5941 | -261417.0 | 102.0 | -1.7 | 128.3<br>(C6)  | 126.0<br>(C5)  | 2.3  |
| <br><b>SI-96</b>  | -416.591  | -261415.0 | 103.9 | 0.2  | 129.0<br>(C7)  | 127.8<br>(C6)  | 1.2  |
| <br><b>SI-97</b>  | -416.5922 | -261415.8 | 103.2 | -0.5 | 128.7<br>(C7)  | 125.9<br>(C8)  | 2.8  |
| <br><b>SI-98</b>  | -417.9701 | -262280.4 |       |      |                |                |      |
| <br><b>SI-99</b>  | -416.6308 | -261440.0 | 102.8 | -0.9 | 129.2<br>(C6)  | 124.9<br>(C5)  | 4.3  |
| <br><b>SI-100</b> | -416.6295 | -261439.2 | 103.6 | -0.1 | 128.9<br>(C7)  | 127.8<br>(C6)  | 1.1  |

|                                                                                   |           |           |       |      |               |               |     |
|-----------------------------------------------------------------------------------|-----------|-----------|-------|------|---------------|---------------|-----|
| 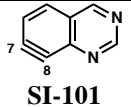 | -416.6319 | -261440.7 | 102.1 | -1.6 | 129.2<br>(C7) | 125.8<br>(C8) | 3.4 |
|-----------------------------------------------------------------------------------|-----------|-----------|-------|------|---------------|---------------|-----|

**D. Other hetarynes (aryne within heterocycle)**

| Structure                                                                           | Energy (hartrees) | Energy (kcal/mol) | Dehydrogenation Energy (kcal/mol) | Standardized Energy (kcal/mol) | Larger Terminus | Smaller Terminus | Angle Difference |
|-------------------------------------------------------------------------------------|-------------------|-------------------|-----------------------------------|--------------------------------|-----------------|------------------|------------------|
|    | -248.285          | -155801.3         |                                   |                                |                 |                  |                  |
|    | -246.9493         | -154963.2         | 100.5                             | -3.2                           | 125.3<br>(C4)   | 124.7<br>(C3)    | 0.6              |
|    | -246.9413         | -154958.1         | 105.6                             | 1.9                            | 151.2<br>(C2)   | 104.0<br>(C3)    | 47.2             |
|    | -264.2876         | -165843.1         |                                   |                                |                 |                  |                  |
|   | -262.946          | -165001.2         | 104.2                             | 0.5                            | 148.7<br>(C3)   | 107.0<br>(C4)    | 41.7             |
|  | -264.3237         | -165865.8         |                                   |                                |                 |                  |                  |
|  | -262.9847         | -165025.5         | 102.6                             | -1.1                           | 147.2<br>(C4)   | 103.4<br>(C5)    | 43.8             |
|  | -280.3221         | -175904.9         |                                   |                                |                 |                  |                  |
|  | -278.9624         | -175051.7         | 115.6                             | 11.9                           | 147.7<br>(C5)   | 96.6<br>(C6)     | 51.1             |
|  | -400.5880         | -251373.0         | 103.9                             | 0.2                            | 150.8<br>(C3)   | 105.4<br>(C4)    | 45.4             |
|  | -400.5905         | -251374.5         | 103.4                             | 0.7                            | 153.0<br>(C2)   | 104.0<br>(C3)    | 49.0             |
|  | -400.5968         | -251378.5         | 99.5                              | -4.2                           | 126.6<br>(C4)   | 124.1<br>(C3)    | 2.5              |
|  | -379.8538         | -238362.1         |                                   |                                |                 |                  |                  |



|                                                                                                       |           |           |       |      |               |               |      |
|-------------------------------------------------------------------------------------------------------|-----------|-----------|-------|------|---------------|---------------|------|
| 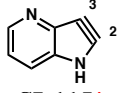<br><b>SI-115*</b>   | -378.4577 | -237486.0 | 138.4 | 34.7 | 114.1<br>(C3) | 110.5<br>(C2) | 3.6  |
| <br><b>SI-116*</b>   | -378.5116 | -237519.8 | 104.6 | 0.9  | 151.8<br>(C5) | 106.7<br>(C6) | 45.1 |
| <br><b>SI-117*</b>   | -378.5207 | -237525.5 | 98.9  | -4.8 | 130.6<br>(C6) | 117.9<br>(C7) | 12.7 |
| <br><b>SI-118</b>    | -379.8545 | -238362.5 |       |      |               |               |      |
| <br><b>SI-119*</b>   | -378.4537 | -237483.5 | 141.4 | 37.7 | 113.7<br>(C3) | 110.5<br>(C2) | 3.2  |
| <br><b>SI-120*</b>   | -378.5208 | -237525.6 | 99.3  | -4.4 | 152.9<br>(C6) | 100.0<br>(C7) | 52.9 |
| <br><b>SI-121</b>   | -379.8535 | -238361.9 |       |      |               |               |      |
| <br><b>SI-122*</b> | -378.4529 | -237483.0 | 141.3 | 37.6 | 114.0<br>(C3) | 110.7<br>(C2) | 3.3  |
| <br><b>SI-123*</b> | -378.5125 | -237520.4 | 103.9 | 0.2  | 151.8<br>(C5) | 103.5<br>(C4) | 48.3 |
| <br><b>SI-124</b>  | -379.8608 | -238366.5 |       |      |               |               |      |
| <br><b>SI-125*</b> | -378.4683 | -237492.6 | 136.2 | 32.5 | 114.9<br>(C3) | 110.0<br>(C2) | 4.9  |
| <br><b>SI-126*</b> | -378.513  | -237520.7 | 101.3 | -2.4 | 125.5<br>(C5) | 125.3<br>(C4) | 0.2  |
| <br><b>SI-127*</b> | -378.5239 | -237527.5 | 108.1 | 4.4  | 149.3<br>(C6) | 108.8<br>(C5) | 40.5 |
| <br><b>SI-128*</b> | -362.4177 | -227420.7 | 140.3 | 36.6 | 114.5<br>(C3) | 110.1<br>(C2) | 4.4  |

|                                                                                                       |           |           |       |      |                |                |      |
|-------------------------------------------------------------------------------------------------------|-----------|-----------|-------|------|----------------|----------------|------|
| 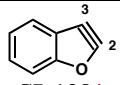<br><b>SI-129*</b>   | -382.26   | -239872.0 | 149.3 | 45.6 | 126.9<br>(C2)  | 100.3<br>(C3)  | 26.6 |
| <br><b>SI-130*</b>   | -705.2874 | -442574.9 | 119.7 | 16.0 | 132.6<br>(C3)  | 102.3<br>(C2)  | 30.3 |
| <br><b>SI-131</b>    | -553.0026 | -347014.7 |       |      |                |                |      |
| <br><b>SI-132*</b>   | -551.621  | -346147.7 | 129.3 | 25.6 | 118.2<br>(N/A) | 118.2<br>(N/A) | 0.0  |
| <br><b>SI-133*</b>   | -551.6334 | -346155.5 | 121.6 | 17.9 | 135.6<br>(C3)  | 97.0<br>(C2)   | 38.6 |
| <br><b>SI-134</b>    | -416.5896 | -261414.1 | 104.8 | 1.1  | 147.5<br>(C3)  | 108.3<br>(C4)  | 39.2 |
| <br><b>SI-135</b>    | -323.4472 | -202966.4 |       |      |                |                |      |
| <br><b>SI-136</b>   | -322.0926 | -202116.3 | 112.4 | 8.7  | 132.1<br>(C3)  | 124.6<br>(C2)  | 7.5  |
| <br><b>SI-137</b>  | -322.1004 | -202121.2 | 107.5 | 3.8  | 127.1<br>(C4)  | 125.4<br>(C3)  | 1.7  |
| <br><b>SI-138</b>  | -268.4764 | -168471.6 |       |      |                |                |      |
| <br><b>SI-139</b>  | -267.0862 | -167599.3 | 134.7 | 31.0 | 132.2<br>(C2)  | 123.1<br>(C3)  | 9.1  |
| <br><b>SI-140</b>  | -267.1193 | -167620.0 | 114.0 | 10.3 | 132.7<br>(C4)  | 119.5<br>(C3)  | 13.2 |
| <br><b>SI-141</b>  | -363.7988 | -228287.4 |       |      |                |                |      |
| <br><b>SI-142*</b> | -362.4096 | -227415.6 | 134.1 | 30.4 | 114.2<br>(C2)  | 110.1<br>(C1)  | 4.1  |

|                                                                                                       |           |           |       |      |               |               |      |
|-------------------------------------------------------------------------------------------------------|-----------|-----------|-------|------|---------------|---------------|------|
| 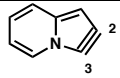<br><b>SI-143*</b>   | -362.3962 | -227407.2 | 142.5 | 38.8 | 118.5<br>(C2) | 106.1<br>(C3) | 12.4 |
| <br><b>SI-144</b>    | -362.4455 | -227438.2 | 111.6 | 7.9  | 130.1<br>(C6) | 124.4<br>(C5) | 5.7  |
| <br><b>SI-145</b>    | -362.4507 | -227441.4 | 108.3 | 4.6  | 134.2<br>(C7) | 120.9<br>(C6) | 13.3 |
| <br><b>SI-146</b>    | -362.4601 | -227447.3 | 102.4 | -1.3 | 130.1<br>(C7) | 124.1<br>(C8) | 6.0  |
| <br><b>SI-147</b>    | -379.8340 | -238349.6 |       |      |               |               |      |
| <br><b>SI-148*</b>   | -378.4337 | -237470.9 | 141.1 | 37.4 | 133.2<br>(C2) | 94.6<br>(C3)  | 38.6 |
| <br><b>SI-149</b>    | -378.4942 | -237508.9 | 103.1 | -0.6 | 130.9<br>(C5) | 122.9<br>(C4) | 8.0  |
| <br><b>SI-150</b>   | -378.4857 | -237503.6 | 108.4 | 4.7  | 134.4<br>(C5) | 121.1<br>(C6) | 13.3 |
| <br><b>SI-151</b>  | -378.4766 | -237497.9 | 114.2 | 10.5 | 130.2<br>(C6) | 123.4<br>(C7) | 6.8  |
| <br><b>SI-152</b>  | -379.8431 | -238355.3 |       |      |               |               |      |
| <br><b>SI-153</b>  | -378.4888 | -237505.5 | 112.2 | 8.5  | 131.1<br>(C6) | 122.9<br>(C5) | 8.2  |
| <br><b>SI-154</b>  | -378.4937 | -237508.6 | 109.1 | 5.4  | 134.5<br>(C7) | 121.3<br>(C6) | 13.2 |
| <br><b>SI-155</b>  | -378.5035 | -237514.7 | 103.0 | -0.7 | 130.7<br>(C7) | 123.1<br>(C8) | 7.6  |
| <br><b>SI-156</b>  | -379.8496 | -238359.4 |       |      |               |               |      |
| <br><b>SI-157*</b> | -378.4444 | -237477.6 | 144.2 | 40.5 | 136.4         | 89.9          | 46.5 |
| <br><b>SI-158</b>  | -378.495  | -237509.4 | 112.4 | 8.7  | 129.7<br>(C6) | 124.1<br>(C5) | 5.6  |

|                                                                                                      |           |           |       |      |               |               |      |
|------------------------------------------------------------------------------------------------------|-----------|-----------|-------|------|---------------|---------------|------|
| 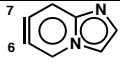<br><b>SI-159</b>   | -378.502  | -237513.8 | 108.0 | 4.3  | 134.7<br>(C7) | 120.9<br>(C6) | 13.8 |
| <br><b>SI-160</b>   | -378.5095 | -237518.5 | 103.3 | -0.4 | 131.4<br>(C7) | 122.7<br>(C8) | 8.7  |
| <br><b>SI-161</b>   | -395.8547 | -248402.8 |       |      |               |               |      |
| <br><b>SI-162</b>   | -394.5125 | -247560.5 | 104.6 | 0.9  | 131.0<br>(C5) | 122.1<br>(C4) | 8.9  |
| <br><b>SI-163</b>   | -394.5044 | -247555.5 | 109.7 | 6.0  | 134.1<br>(C5) | 121.7<br>(C6) | 12.4 |
| <br><b>SI-164</b>   | -394.4956 | -247549.9 | 115.2 | 11.5 | 131.2<br>(C6) | 121.9<br>(C7) | 9.3  |
| <br><b>SI-165</b>   | -395.8872 | -248423.2 |       |      |               |               |      |
| <br><b>SI-166</b>   | -394.5285 | -247570.6 | 115.0 | 11.3 | 130.4<br>(C6) | 122.3<br>(C5) | 8.1  |
| <br><b>SI-167</b>  | -394.5392 | -247577.3 | 108.3 | 4.6  | 134.8<br>(C7) | 121.2<br>(C6) | 13.6 |
| <br><b>SI-168</b> | -394.5457 | -247581.4 | 104.2 | 0.5  | 132.1<br>(C7) | 121.4<br>(C8) | 10.7 |
| <br><b>SI-169</b> | -395.8681 | -248411.2 |       |      |               |               |      |
| <br><b>SI-170</b> | -394.5115 | -247559.9 | 113.7 | 10.0 | 130.4<br>(C6) | 122.7<br>(C5) | 7.7  |
| <br><b>SI-171</b> | -394.5187 | -247564.4 | 109.1 | 5.4  | 135.4<br>(C7) | 120.9<br>(C6) | 14.5 |
| <br><b>SI-172</b> | -394.5265 | -247569.3 | 104.2 | 0.5  | 132.1<br>(C7) | 121.5<br>(C8) | 10.6 |
| <br><b>SI-173</b> | -417.966  | -262277.8 |       |      |               |               |      |
| <br><b>SI-174</b> | -416.6274 | -261437.9 | 102.4 | -1.3 | 153.5<br>(C2) | 103.2<br>(C3) | 50.3 |

|                                                                                                      |           |           |       |      |               |               |      |
|------------------------------------------------------------------------------------------------------|-----------|-----------|-------|------|---------------|---------------|------|
| 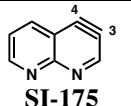<br><b>SI-175</b>   | -416.6305 | -261439.8 | 100.4 | -3.3 | 125.6<br>(C4) | 124.3<br>(C3) | 1.3  |
| <br><b>SI-176</b>   | -417.9652 | -262277.3 |       |      |               |               |      |
| <br><b>SI-177</b>   | -416.6239 | -261435.7 | 104.1 | 0.4  | 152.5<br>(C2) | 105.2<br>(C3) | 47.3 |
| <br><b>SI-178</b>   | -416.6306 | -261439.9 | 99.8  | -3.9 | 125.5<br>(C4) | 125.1<br>(C3) | 0.3  |
| <br><b>SI-179</b>   | -416.6236 | -261435.5 | 104.2 | 0.5  | 151.5<br>(C6) | 104.4<br>(C5) | 47.1 |
| <br><b>SI-180</b>   | -417.9661 | -262277.9 |       |      |               |               |      |
| <br><b>SI-181</b>   | -416.6250 | -261436.4 | 103.9 | 0.2  | 152.6<br>(C2) | 104.9<br>(C3) | 47.7 |
| <br><b>SI-182</b>  | -416.6303 | -261439.7 | 100.6 | -3.1 | 125.1<br>(C4) | 125.0<br>(C3) | 0.1  |
| <br><b>SI-183</b> | -416.6229 | -261435.0 | 105.2 | 1.5  | 149.8<br>(C7) | 107.5<br>(C8) | 42.3 |
| <br><b>SI-184</b> | -417.9685 | -262279.4 |       |      |               |               |      |
| <br><b>SI-185</b> | -416.6255 | -261436.7 | 105.1 | 1.4  | 152.9<br>(C2) | 105.1<br>(C3) | 47.8 |
| <br><b>SI-186</b> | -416.6338 | -261441.9 | 99.9  | -3.8 | 125.6<br>(C3) | 125.1<br>(C4) | 0.5  |
| <br><b>SI-187</b> | -417.964  | -262276.6 |       |      |               |               |      |
| <br><b>SI-188</b> | -416.6224 | -261434.7 | 104.2 | 0.5  | 151.0<br>(C3) | 105.0<br>(C4) | 46.0 |
| <br><b>SI-189</b> | -417.9629 | -262275.9 |       |      |               |               |      |
| <br><b>SI-190</b> | -416.6208 | -261433.7 | 104.6 | 0.9  | 151.2<br>(C3) | 103.8<br>(C4) | 47.4 |

|                                                                                                      |           |           |       |      |               |               |      |
|------------------------------------------------------------------------------------------------------|-----------|-----------|-------|------|---------------|---------------|------|
| 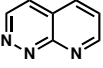<br><b>SI-191</b>   | -433.9645 | -272317.1 |       |      |               |               |      |
| <br><b>SI-192</b>   | -432.6200 | -271473.4 | 106.1 | 2.4  | 148.7<br>(C3) | 106.4<br>(C4) | 42.3 |
| <br><b>SI-193</b>   | -432.6286 | -271478.8 | 100.7 | -3.0 | 125.4<br>(C5) | 124.3<br>(C6) | 1.0  |
| <br><b>SI-194</b>   | -432.6245 | -271476.2 | 103.2 | -0.5 | 153.3<br>(C7) | 104.3<br>(C6) | 49.0 |
| <br><b>SI-195</b>   | -433.9648 | -272317.3 |       |      |               |               |      |
| <br><b>SI-196</b>   | -432.6216 | -271474.4 | 105.2 | 1.5  | 147.4<br>(C3) | 108.1<br>(C4) | 39.3 |
| <br><b>SI-197</b>   | -432.6225 | -271474.9 | 104.7 | 1.0  | 151.5<br>(C6) | 104.2<br>(C5) | 47.1 |
| <br><b>SI-198</b>  | -433.9645 | -272317.1 |       |      |               |               |      |
| <br><b>SI-199</b> | -432.6206 | -271473.8 | 105.7 | 2.0  | 148.4<br>(C3) | 106.3<br>(C4) | 42.1 |
| <br><b>SI-200</b> | -432.6192 | -271472.9 | 106.6 | 2.9  | 149.9<br>(C7) | 106.2<br>(C8) | 43.7 |
| <br><b>SI-201</b> | -433.9687 | -272319.7 |       |      |               |               |      |
| <br><b>SI-202</b> | -432.6252 | -271476.6 | 105.4 | 1.7  | 146.2<br>(C3) | 109.9<br>(C4) | 36.3 |
| <br><b>SI-203</b> | -432.6248 | -271476.4 | 105.7 | 2.0  | 152.5<br>(C6) | 106.1<br>(C7) | 46.4 |
| <br><b>SI-204</b> | -432.6314 | -271480.5 | 101.5 | -2.2 | 125.6<br>(C7) | 124.6<br>(C8) | 1.0  |
| <br><b>SI-205</b> | -434.0045 | -272342.2 |       |      |               |               |      |

|                                                                                                      |           |           |       |      |               |               |      |
|------------------------------------------------------------------------------------------------------|-----------|-----------|-------|------|---------------|---------------|------|
| 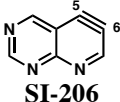<br><b>SI-206</b>   | -432.6671 | -271502.9 | 101.6 | -2.1 | 124.9<br>(C6) | 124.5<br>(C5) | 0.4  |
| <br><b>SI-207</b>   | -432.6647 | -271501.4 | 103.1 | -0.6 | 153.0<br>(C7) | 104.3<br>(C6) | 48.7 |
| <br><b>SI-208</b>   | -434.0037 | -272341.7 |       |      |               |               |      |
| <br><b>SI-209</b>   | -432.6592 | -271498.0 | 106.1 | 2.4  | 151.9<br>(C6) | 102.6<br>(C5) | 49.3 |
| <br><b>SI-210</b>   | -434.0001 | -272339.4 |       |      |               |               |      |
| <br><b>SI-211</b>   | -432.6304 | -271479.9 | 121.9 | 18.2 | 154.1<br>(C2) | 91.8<br>(C3)  | 62.3 |
| <br><b>SI-212</b>   | -432.6637 | -271500.8 | 101.0 | -2.7 | 125.5<br>(C6) | 124.4<br>(C5) | 1.1  |
| <br><b>SI-213</b>  | -432.6583 | -271497.4 | 104.4 | 0.7  | 153.5<br>(C7) | 104.4<br>(C6) | 49.1 |
| <br><b>SI-214</b> | -433.9981 | -272338.1 |       |      |               |               |      |
| <br><b>SI-215</b> | -432.6244 | -271476.1 | 124.4 | 20.7 | 131.9<br>(C3) | 131.5<br>(C2) | 0.4  |
| <br><b>SI-216</b> | -432.6546 | -271495.1 | 105.4 | 1.7  | 150.4<br>(C6) | 106.4<br>(C5) | 44.0 |

### E. Selected Energies using MP2/6-311+G\*\*

| Structure                                                                                           | Energy (hartrees) | Energy (kcal/mol) | Dehydrogenation Energy (kcal/mol) | Standardized Energy (kcal/mol) | Larger Terminus | Smaller Terminus | Angle Difference |
|-----------------------------------------------------------------------------------------------------|-------------------|-------------------|-----------------------------------|--------------------------------|-----------------|------------------|------------------|
| <b>H-H</b>                                                                                          | -1.1602722        | -728.1            |                                   |                                |                 |                  |                  |
| <br><b>SI-1a</b> | -231.5838779      | -145321.2         |                                   |                                |                 |                  |                  |

|                                                                                                       |              |           |      |      |                |                |     |
|-------------------------------------------------------------------------------------------------------|--------------|-----------|------|------|----------------|----------------|-----|
| <br><b>SI-3a*</b>    | -230.2732476 | -144498.8 | 94.4 | 0.0  | 126.8<br>(N/A) | 126.8<br>(N/A) | 0.0 |
| <br><b>SI-4a</b>     | -345.8429028 | -217019.9 |      |      |                |                |     |
| <br><b>SI-5a*</b>    | -344.5380523 | -216201.1 | 90.7 | -3.6 | 130.6<br>(C1)  | 122.8<br>(C2)  | 7.8 |
| <br><b>SI-6a</b>     | -362.8267529 | -227677.4 |      |      |                |                |     |
| <br><b>SI-7a*</b>    | -361.5173825 | -226855.8 | 93.6 | -0.8 | 127.4<br>(C5)  | 126.1<br>(C4)  | 1.3 |
| <br><b>SI-8a*</b>    | -361.5120066 | -226852.4 | 96.9 | 2.6  | 128.3<br>(C6)  | 128.0<br>(C5)  | 0.3 |
| <br><b>SI-9a*</b>   | -361.5181322 | -226856.2 | 93.1 | -1.3 | 129.2<br>(C6)  | 122.3<br>(C7)  | 6.9 |
| <br><b>SI-10a</b>  | -382.6636787 | -240125.3 |      |      |                |                |     |
| <br><b>SI-11a*</b> | -381.3515379 | -239301.9 | 95.3 | 0.9  | 127.8<br>(C5)  | 125.2<br>(C4)  | 2.6 |
| <br><b>SI-12a*</b> | -381.3488424 | -239300.2 | 97.0 | 2.6  | 128.3<br>(N/A) | 128.3<br>(N/A) | 0.0 |
| <br><b>SI-13a*</b> | -381.3520756 | -239302.2 | 95.0 | 0.6  | 129.9<br>(C6)  | 120.8<br>(C7)  | 9.1 |
| <br><b>SI-30a</b>  | -394.8552468 | -247775.6 |      |      |                |                |     |
| <br><b>SI-31a*</b> | -393.5423481 | -246951.8 | 95.8 | 1.4  | 128.1<br>(C5)  | 124.0<br>(C4)  | 4.1 |



|                                                                                                        |              |           |       |      |               |               |      |
|--------------------------------------------------------------------------------------------------------|--------------|-----------|-------|------|---------------|---------------|------|
| 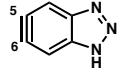<br><b>SI-32a*</b>    | -393.5378788 | -246949.0 | 98.6  | 4.2  | 129.5<br>(C6) | 128.3<br>(C5) | 1.2  |
| <br><b>SI-33a*</b>    | -393.5433232 | -246952.4 | 95.2  | 0.8  | 129.7<br>(C6) | 121.1<br>(C7) | 8.6  |
| <br><b>SI-38a</b>     | -705.2721885 | -442565.4 |       |      |               |               |      |
| <br><b>SI-82a</b>     | -400.8327162 | -251526.5 |       |      |               |               |      |
| <br><b>SI-83a*</b>    | -399.5239462 | -250705.3 | 93.2  | -1.2 | 127.3<br>(C5) | 126.8<br>(C6) | 0.5  |
| <br><b>SI-84a*</b>    | -399.5173046 | -250701.1 | 97.4  | 3.0  | 128.2<br>(C7) | 127.2<br>(C6) | 1.0  |
| <br><b>SI-85a*</b>    | -399.5236281 | -250705.1 | 93.4  | -1.0 | 128.7<br>(C7) | 125.5<br>(C8) | 3.2  |
| <br><b>SI-86a</b>   | -400.830496  | -251525.1 |       |      |               |               |      |
| <br><b>SI-102a</b>  | -247.6089605 | -155377.1 |       |      |               |               |      |
| <br><b>SI-103a*</b> | -246.3010004 | -154556.3 | 92.7  | -1.7 | 126.2<br>(C4) | 123.0<br>(C3) | 3.2  |
| <br><b>SI-104a*</b> | -246.2879319 | -154548.1 | 100.9 | 6.5  | 145.9<br>(C2) | 111.6<br>(C3) | 34.3 |
| <br><b>SI-105a</b>  | -263.6000902 | -165411.7 |       |      |               |               |      |
| <br><b>SI-106a*</b> | -262.2797103 | -164583.1 | 100.5 | 6.1  | 140.0<br>(C3) | 116.6<br>(C4) | 23.4 |
| <br><b>SI-107a</b>  | -263.63605   | -165434.3 |       |      |               |               |      |

|                                                                                                        |              |           |       |      |               |               |      |
|--------------------------------------------------------------------------------------------------------|--------------|-----------|-------|------|---------------|---------------|------|
| <br><b>SI-108a*</b>   | -262.3192632 | -164608.0 | 98.2  | 3.9  | 141.9<br>(C4) | 110.5<br>(C5) | 31.4 |
| <br><b>SI-109a</b>    | -279.6239417 | -175466.8 |       |      |               |               |      |
| <br><b>SI-110a*</b>   | -278.2851891 | -174626.7 | 112.0 | 17.6 | 132.8<br>(C5) | 123.9<br>(C6) | 8.9  |
| <br><b>SI-111a*</b>   | -399.5109697 | -250697.1 | 99.9  | 5.6  | 141.5<br>(C3) | 117.0<br>(C4) | 24.5 |
| <br><b>SI-112a*</b>   | -399.5123645 | -250698.0 | 100.5 | 6.1  | 151.0<br>(C2) | 107.7<br>(C3) | 43.3 |
| <br><b>SI-113a*</b>   | -399.5278657 | -250707.7 | 90.7  | -3.6 | 126.8<br>(C4) | 123.3<br>(C3) | 3.5  |
| <br><b>SI-114a</b>    | -378.8526836 | -237733.8 |       |      |               |               |      |
| <br><b>SI-115a*</b>  | -377.4848399 | -236875.5 | 130.3 | 35.9 | 118.0<br>(C2) | 105.2<br>(C3) | 12.8 |
| <br><b>SI-116a*</b> | -377.5302974 | -236904.0 | 101.7 | 7.4  | 148.5<br>(C5) | 112.2<br>(C6) | 36.3 |
| <br><b>SI-117a*</b> | -377.5473884 | -236914.8 | 91.0  | -3.3 | 125.1<br>(C6) | 122.8<br>(C7) | 2.3  |
| <br><b>SI-118a</b>  | -378.8527666 | -237733.9 |       |      |               |               |      |
| <br><b>SI-119a*</b> | -377.4832556 | -236874.5 | 131.3 | 36.9 | 116.6<br>(C2) | 106.0<br>(C3) | 10.6 |
| <br><b>SI-120a*</b> | -377.5387573 | -236909.3 | 96.5  | 2.1  | 151.7<br>(C6) | 103.0<br>(C7) | 48.7 |
| <br><b>SI-121</b>   | -378.8521074 | -237733.5 |       |      |               |               |      |

|                                                                                                        |              |           |       |      |                |                |      |
|--------------------------------------------------------------------------------------------------------|--------------|-----------|-------|------|----------------|----------------|------|
| 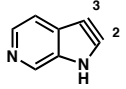<br><b>SI-122a*</b>   | -377.4820657 | -236873.8 | 131.6 | 37.3 | 117.5<br>(C2)  | 105.4<br>(C3)  | 12.1 |
| <br><b>SI-123a*</b>   | -377.5313632 | -236904.7 | 100.7 | 6.3  | 144.3<br>(C5)  | 113.4<br>(C4)  | 30.9 |
| <br><b>SI-124a</b>    | -378.8594773 | -237738.1 |       |      |                |                |      |
| <br><b>SI-125a*</b>   | -377.4963563 | -236882.7 | 127.3 | 32.9 | 116.9<br>(C2)  | 106.5<br>(C3)  | 10.4 |
| <br><b>SI-126a*</b>   | -377.5512763 | -236917.2 | 92.8  | -1.5 | 126.2<br>(C4)  | 123.9<br>(C5)  | 2.3  |
| <br><b>SI-127a*</b>   | -377.5343047 | -236906.6 | 103.5 | 9.1  | 142.4<br>(C6)  | 117.2<br>(C5)  | 25.2 |
| <br><b>SI-128a*</b>  | -361.4587617 | -226819.0 | 130.3 | 36.0 | 116.9<br>(C2)  | 106.1<br>(C3)  | 10.8 |
| <br><b>SI-129a*</b> | -381.2835416 | -239259.2 | 138.0 | 43.6 | 118.8<br>(C2)  | 106.4<br>(C3)  | 12.4 |
| <br><b>SI-130a*</b> | -703.9307758 | -441723.6 | 113.7 | 19.3 | 118.1<br>(C2)  | 114.5<br>(C3)  | 3.6  |
| <br><b>SI-131a</b>  | -552.0441704 | -346413.2 |       |      |                |                |      |
| <br><b>SI-132a*</b> | -550.6874736 | -345561.9 | 123.3 | 28.9 | 116.7<br>(N/A) | 116.7<br>(N/A) | 0.0  |
| <br><b>SI-133a*</b> | -550.6969653 | -345567.9 | 117.3 | 23.0 | 115.9<br>(C2)  | 114.7<br>(C3)  | 1.2  |
| <br><b>SI-141a</b>  | -362.8059171 | -227664.3 |       |      |                |                |      |
| <br><b>SI-142a*</b> | -361.4470206 | -226811.6 | 124.6 | 30.3 | 113.1<br>(C2)  | 110.0<br>(C1)  | 3.1  |

|                                                                                                      |              |           |       |      |               |               |      |
|------------------------------------------------------------------------------------------------------|--------------|-----------|-------|------|---------------|---------------|------|
| 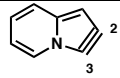<br><b>SI-143a*</b> | -361.4325605 | -226802.5 | 133.7 | 39.4 | 114.2<br>(C3) | 109.2<br>(C2) | 5.0  |
| <br><b>SI-147a</b>  | -378.8302728 | -237719.8 |       |      |               |               |      |
| <br><b>SI-148a*</b> | -377.4548064 | -236856.7 | 135.0 | 40.7 | 119.4<br>(C2) | 106.4<br>(C3) | 13.0 |
| <br><b>SI-156a</b>  | -378.8460432 | -237729.7 |       |      |               |               |      |
| <br><b>SI-157a*</b> | -377.4509762 | -236854.3 | 147.3 | 53.0 | 113.0<br>(C3) | 112.2<br>(C2) | 0.8  |

## Coordinates of Computed Structures

## A. Calculations with B3LYP/6-31G\*

SI-1

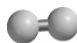

|   |          |          |           |
|---|----------|----------|-----------|
| H | 0.000000 | 0.000000 | 0.371578  |
| H | 0.000000 | 0.000000 | -0.371578 |

SI-2

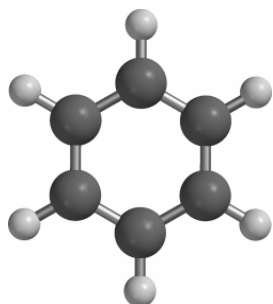

|   |           |           |           |
|---|-----------|-----------|-----------|
| H | 2.484269  | 0.000000  | -0.000000 |
| C | 1.397048  | 0.000000  | -0.000000 |
| C | -1.397048 | -0.000000 | 0.000000  |
| C | 0.698524  | 1.209879  | 0.000000  |
| C | 0.698524  | -1.209879 | -0.000000 |
| C | -0.698524 | -1.209879 | -0.000000 |
| C | -0.698524 | 1.209879  | 0.000000  |
| H | 1.242135  | 2.151440  | 0.000000  |
| H | 1.242135  | -2.151440 | -0.000000 |
| H | -1.242135 | -2.151440 | -0.000000 |
| H | -1.242135 | 2.151440  | 0.000000  |
| H | -2.484269 | -0.000000 | 0.000000  |

SI-3\*

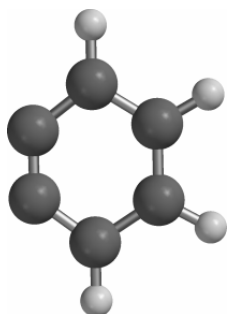

|   |           |           |           |
|---|-----------|-----------|-----------|
| C | 0.625554  | 0.000000  | 1.237609  |
| C | -0.703547 | -0.000000 | -1.058538 |
| C | -0.625554 | -0.000000 | 1.237609  |
| C | 1.461350  | 0.000000  | 0.133663  |
| C | 0.703547  | 0.000000  | -1.058538 |
| C | -1.461350 | -0.000000 | 0.133663  |
| H | 2.546616  | 0.000000  | 0.134515  |
| H | 1.229529  | 0.000000  | -2.010917 |
| H | -2.546616 | -0.000000 | 0.134515  |
| H | -1.229529 | -0.000000 | -2.010917 |

SI-4

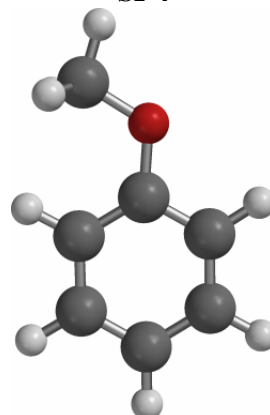

|   |           |           |           |
|---|-----------|-----------|-----------|
| H | -0.135193 | -2.330225 | 0.000000  |
| C | -0.492177 | -1.304778 | 0.000000  |
| C | -1.343988 | 1.346699  | 0.000000  |
| C | 0.453709  | -0.268524 | 0.000000  |
| C | -1.849965 | -1.007648 | 0.000000  |
| C | -2.286811 | 0.321871  | 0.000000  |
| C | 0.025817  | 1.063988  | 0.000000  |
| H | -2.573123 | -1.819173 | 0.000000  |
| H | -3.348440 | 0.551637  | 0.000000  |
| H | 0.739070  | 1.880156  | 0.000000  |
| H | -1.667645 | 2.384512  | 0.000000  |
| O | 1.762023  | -0.664345 | 0.000000  |
| C | 2.765670  | 0.336671  | 0.000000  |
| H | 2.705220  | 0.971054  | -0.894707 |
| H | 3.719247  | -0.194937 | 0.000000  |
| H | 2.705220  | 0.971054  | 0.894707  |

SI-5\*

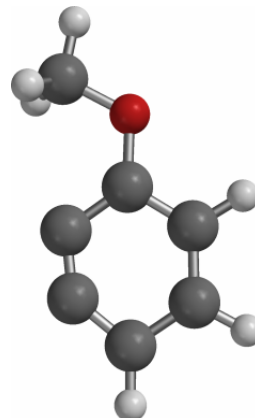

|   |           |           |           |
|---|-----------|-----------|-----------|
| H | -0.279144 | -2.243871 | 0.000000  |
| C | -0.560704 | -1.194627 | 0.000000  |
| C | -1.220427 | 1.310456  | 0.000000  |
| C | 0.473728  | -0.226055 | 0.000000  |
| C | -1.912589 | -0.830830 | 0.000000  |
| C | -2.343404 | 0.520072  | 0.000000  |
| C | 0.014839  | 1.093266  | 0.000000  |
| H | -2.667498 | -1.614583 | 0.000000  |
| H | -3.383608 | 0.820240  | 0.000000  |
| O | 1.759860  | -0.642419 | 0.000000  |
| C | 2.744737  | 0.386160  | 0.000000  |
| H | 2.651629  | 1.016573  | -0.892610 |
| H | 3.711716  | -0.119566 | 0.000000  |

H 2.651629 1.016573 0.892610

SI-6

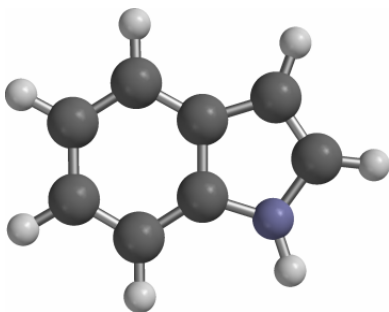

|   |           |           |          |
|---|-----------|-----------|----------|
| H | -1.016054 | -2.513274 | 0.000000 |
| C | -0.985787 | -1.426483 | 0.000000 |
| C | -0.934480 | 1.420966  | 0.000000 |
| C | 0.247658  | -0.751135 | 0.000000 |
| C | -2.161696 | -0.687735 | 0.000000 |
| C | -2.136209 | 0.722456  | 0.000000 |
| C | 0.247797  | 0.672737  | 0.000000 |
| H | -3.119466 | -1.201144 | 0.000000 |
| H | -3.072698 | 1.273637  | 0.000000 |
| H | -0.916247 | 2.508033  | 0.000000 |
| C | 1.622707  | -1.168675 | 0.000000 |
| H | 1.993539  | -2.184640 | 0.000000 |
| C | 2.388865  | -0.033424 | 0.000000 |
| H | 3.463985  | 0.082184  | 0.000000 |
| N | 1.567169  | 1.079268  | 0.000000 |
| H | 1.883789  | 2.036046  | 0.000000 |

SI-8\*

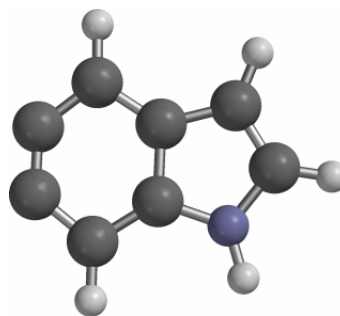

|   |           |           |           |
|---|-----------|-----------|-----------|
| H | -1.137958 | -2.575893 | 0.000000  |
| C | -1.099803 | -1.491332 | 0.000000  |
| C | -1.059455 | 1.475166  | -0.000000 |
| C | 0.121887  | -0.760476 | 0.000000  |
| C | -2.156485 | -0.611040 | -0.000000 |
| C | -2.161208 | 0.644711  | -0.000000 |
| C | 0.116248  | 0.682985  | -0.000000 |
| H | -1.046542 | 2.561466  | -0.000000 |
| C | 1.501365  | -1.165227 | 0.000000  |
| H | 1.876684  | -2.179267 | 0.000000  |
| C | 2.262569  | -0.027547 | 0.000000  |
| H | 3.337696  | 0.090979  | 0.000000  |
| N | 1.437982  | 1.082782  | 0.000000  |
| H | 1.753550  | 2.039798  | -0.000000 |

SI-9\*

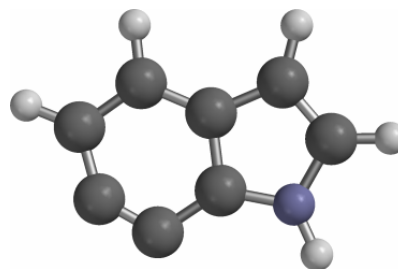

|   |           |           |          |
|---|-----------|-----------|----------|
| H | -1.257405 | -2.341034 | 0.000000 |
| C | -1.166698 | -1.257261 | 0.000000 |
| C | -0.934782 | 1.505611  | 0.000000 |
| C | 0.116526  | -0.660828 | 0.000000 |
| C | -2.340641 | -0.483505 | 0.000000 |
| C | -2.008758 | 0.864042  | 0.000000 |
| C | 0.250204  | 0.773065  | 0.000000 |
| H | -3.332302 | -0.919301 | 0.000000 |
| C | 1.456396  | -1.181163 | 0.000000 |
| H | 1.749941  | -2.222165 | 0.000000 |
| C | 2.314449  | -0.112211 | 0.000000 |
| H | 3.395239  | -0.089322 | 0.000000 |
| N | 1.591861  | 1.068688  | 0.000000 |
| H | 1.981978  | 1.998035  | 0.000000 |

SI-7\*

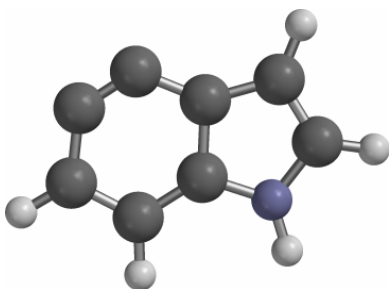

|   |           |           |          |
|---|-----------|-----------|----------|
| C | -0.999055 | -1.465025 | 0.000000 |
| C | -1.119874 | 1.247945  | 0.000000 |
| C | 0.260615  | -0.864366 | 0.000000 |
| C | -2.084933 | -0.852996 | 0.000000 |
| C | -2.322232 | 0.523128  | 0.000000 |
| C | 0.119028  | 0.572630  | 0.000000 |
| H | -3.288928 | 1.014761  | 0.000000 |
| H | -1.149899 | 2.335151  | 0.000000 |
| C | 1.656839  | -1.161591 | 0.000000 |
| H | 2.117196  | -2.139101 | 0.000000 |
| C | 2.315393  | 0.043591  | 0.000000 |
| H | 3.376305  | 0.251677  | 0.000000 |
| N | 1.403907  | 1.080172  | 0.000000 |
| H | 1.645458  | 2.058821  | 0.000000 |

SI-10

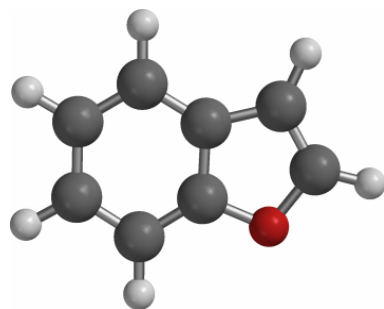

|   |           |           |          |
|---|-----------|-----------|----------|
| H | -0.876074 | -2.499235 | 0.000000 |
| C | -0.911963 | -1.414616 | 0.000000 |
| C | -0.964783 | 1.440415  | 0.000000 |
| C | 0.249954  | -0.651998 | 0.000000 |
| C | -2.115688 | -0.711741 | 0.000000 |
| C | -2.140674 | 0.695892  | 0.000000 |
| C | 0.260367  | 0.755890  | 0.000000 |
| H | -3.052220 | -1.262374 | 0.000000 |
| H | -3.098727 | 1.208605  | 0.000000 |
| H | -0.995211 | 2.526662  | 0.000000 |
| C | 1.655982  | 1.127045  | 0.000000 |
| H | 2.074639  | 2.124094  | 0.000000 |
| C | 2.352486  | -0.035617 | 0.000000 |
| H | 3.410051  | -0.254982 | 0.000000 |
| O | 1.531489  | -1.137232 | 0.000000 |

SI-12\*

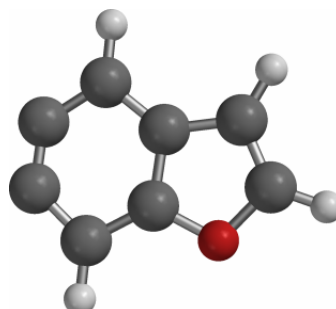

|   |           |           |          |
|---|-----------|-----------|----------|
| H | -1.144718 | -2.576332 | 0.000000 |
| C | -1.095012 | -1.492582 | 0.000000 |
| C | -1.024714 | 1.481654  | 0.000000 |
| C | 0.122798  | -0.765101 | 0.000000 |
| C | -2.147046 | -0.599424 | 0.000000 |
| C | -2.132468 | 0.654411  | 0.000000 |
| C | 0.121751  | 0.663860  | 0.000000 |
| H | -0.984070 | 2.565320  | 0.000000 |
| C | 1.518551  | -1.135662 | 0.000000 |
| H | 1.932272  | -2.134492 | 0.000000 |
| C | 2.222251  | 0.022271  | 0.000000 |
| H | 3.281470  | 0.234667  | 0.000000 |
| O | 1.409150  | 1.128841  | 0.000000 |

SI-11\*

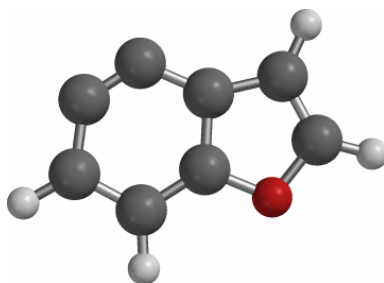

|   |           |           |          |
|---|-----------|-----------|----------|
| C | -0.984044 | -1.484390 | 0.000000 |
| C | -1.101388 | 1.244675  | 0.000000 |
| C | 0.265578  | -0.865982 | 0.000000 |
| C | -2.060443 | -0.852761 | 0.000000 |
| C | -2.306077 | 0.518698  | 0.000000 |
| C | 0.119361  | 0.551482  | 0.000000 |
| H | -3.274453 | 1.006061  | 0.000000 |
| H | -1.109049 | 2.330292  | 0.000000 |
| C | 1.679376  | -1.120323 | 0.000000 |
| H | 2.182058  | -2.076646 | 0.000000 |
| C | 2.268934  | 0.103456  | 0.000000 |
| H | 3.303505  | 0.413185  | 0.000000 |
| O | 1.360126  | 1.130814  | 0.000000 |

SI-13\*

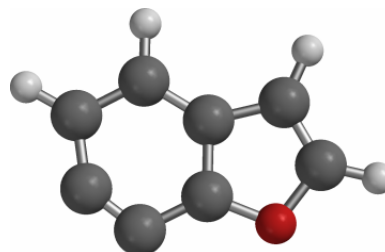

|   |           |           |          |
|---|-----------|-----------|----------|
| H | -1.244032 | -2.349703 | 0.000000 |
| C | -1.146057 | -1.267136 | 0.000000 |
| C | -0.897150 | 1.507194  | 0.000000 |
| C | 0.132354  | -0.667956 | 0.000000 |
| C | -2.314896 | -0.479834 | 0.000000 |
| C | -1.970403 | 0.859538  | 0.000000 |
| C | 0.261696  | 0.750725  | 0.000000 |
| H | -3.310305 | -0.906649 | 0.000000 |
| C | 1.491013  | -1.156215 | 0.000000 |
| H | 1.824751  | -2.184811 | 0.000000 |
| C | 2.289830  | -0.059774 | 0.000000 |
| H | 3.362682  | 0.062330  | 0.000000 |
| O | 1.574915  | 1.114169  | 0.000000 |

SI-14

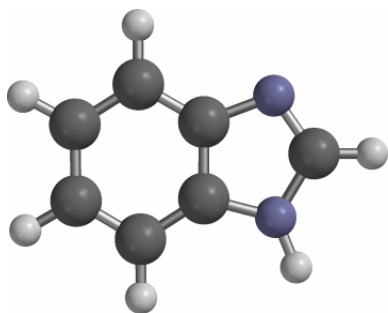

|   |           |           |          |
|---|-----------|-----------|----------|
| C | -0.274193 | -0.720132 | 0.000000 |
| C | -0.256889 | 0.696219  | 0.000000 |
| N | -1.582746 | -1.191123 | 0.000000 |
| C | -2.321586 | -0.112562 | 0.000000 |
| H | -3.404715 | -0.098727 | 0.000000 |
| N | -1.593957 | 1.056711  | 0.000000 |
| H | -1.968205 | 1.993733  | 0.000000 |
| C | 0.934003  | -1.429087 | 0.000000 |
| H | 0.928841  | -2.514731 | 0.000000 |
| C | 2.119952  | -0.702661 | 0.000000 |
| H | 3.070597  | -1.228630 | 0.000000 |
| C | 2.117529  | 0.707435  | 0.000000 |
| H | 3.064321  | 1.240380  | 0.000000 |
| C | 0.929427  | 1.433446  | 0.000000 |
| H | 0.931990  | 2.520063  | 0.000000 |

SI-16

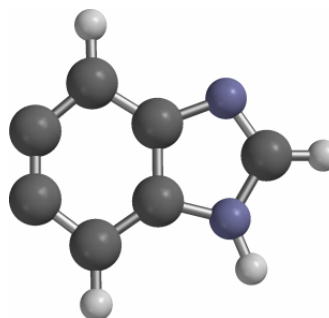

|   |           |           |          |
|---|-----------|-----------|----------|
| H | -1.063894 | -2.574431 | 0.000000 |
| C | -1.053603 | -1.490434 | 0.000000 |
| C | -1.040279 | 1.491372  | 0.000000 |
| C | 0.148314  | -0.735075 | 0.000000 |
| C | -2.113798 | -0.612857 | 0.000000 |
| C | -2.131938 | 0.641939  | 0.000000 |
| C | 0.132259  | 0.703385  | 0.000000 |
| H | -1.044562 | 2.577203  | 0.000000 |
| N | 1.474061  | 1.046579  | 0.000000 |
| H | 1.854476  | 1.981178  | 0.000000 |
| C | 2.196808  | -0.125230 | 0.000000 |
| H | 3.280265  | -0.115310 | 0.000000 |
| N | 1.454527  | -1.200682 | 0.000000 |

SI-15

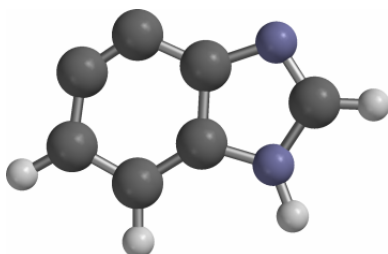

|   |           |           |          |
|---|-----------|-----------|----------|
| C | -0.935530 | -1.485329 | 0.000000 |
| C | -1.103408 | 1.257746  | 0.000000 |
| C | 0.297977  | -0.833243 | 0.000000 |
| C | -2.016687 | -0.860778 | 0.000000 |
| C | -2.290806 | 0.503571  | 0.000000 |
| C | 0.137687  | 0.594206  | 0.000000 |
| H | -3.268660 | 0.971694  | 0.000000 |
| H | -1.155775 | 2.343429  | 0.000000 |
| N | 1.441586  | 1.062248  | 0.000000 |
| H | 1.739439  | 2.026739  | 0.000000 |
| C | 2.267467  | -0.036986 | 0.000000 |
| H | 3.344690  | 0.071969  | 0.000000 |
| N | 1.629130  | -1.182087 | 0.000000 |

SI-17

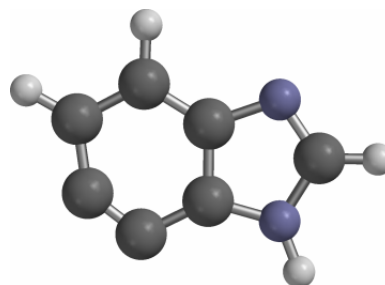

|   |           |           |          |
|---|-----------|-----------|----------|
| H | -1.174415 | -2.358845 | 0.000000 |
| C | -1.117038 | -1.274398 | 0.000000 |
| C | -0.921662 | 1.507547  | 0.000000 |
| C | 0.148779  | -0.646299 | 0.000000 |
| C | -2.297755 | -0.511987 | 0.000000 |
| C | -1.980782 | 0.839198  | 0.000000 |
| C | 0.262937  | 0.778951  | 0.000000 |
| H | -3.286090 | -0.955088 | 0.000000 |
| N | 1.620518  | 1.027903  | 0.000000 |
| H | 2.066661  | 1.933131  | 0.000000 |
| C | 2.242880  | -0.201132 | 0.000000 |
| H | 3.322728  | -0.282104 | 0.000000 |
| N | 1.415004  | -1.215215 | 0.000000 |



SI-18

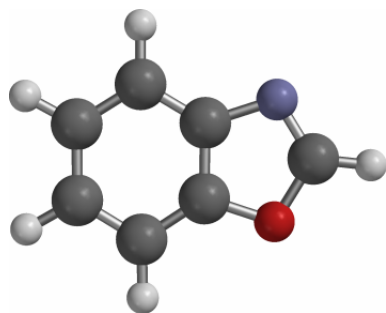

|   |           |           |          |
|---|-----------|-----------|----------|
| H | -0.933123 | -2.522706 | 0.000000 |
| C | -0.926882 | -1.437477 | 0.000000 |
| C | -0.896639 | 1.434753  | 0.000000 |
| C | 0.276878  | -0.728234 | 0.000000 |
| C | -2.106531 | -0.694794 | 0.000000 |
| C | -2.092383 | 0.712815  | 0.000000 |
| C | 0.262349  | 0.672766  | 0.000000 |
| H | -3.061802 | -1.211816 | 0.000000 |
| H | -3.035041 | 1.252624  | 0.000000 |
| H | -0.873782 | 2.519250  | 0.000000 |
| O | 1.570134  | 1.099402  | 0.000000 |
| C | 2.287097  | -0.068213 | 0.000000 |
| H | 3.362444  | 0.044815  | 0.000000 |
| N | 1.607511  | -1.164251 | 0.000000 |

SI-20

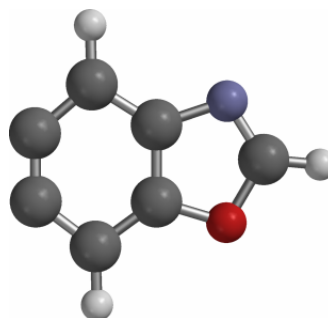

|   |           |           |          |
|---|-----------|-----------|----------|
| H | -1.070857 | -2.579363 | 0.000000 |
| C | -1.050854 | -1.495750 | 0.000000 |
| C | -1.015329 | 1.495396  | 0.000000 |
| C | 0.143676  | -0.739305 | 0.000000 |
| C | -2.109478 | -0.608703 | 0.000000 |
| C | -2.109099 | 0.644716  | 0.000000 |
| C | 0.130611  | 0.684533  | 0.000000 |
| H | -0.997595 | 2.579320  | 0.000000 |
| O | 1.441851  | 1.094893  | 0.000000 |
| C | 2.155840  | -0.074475 | 0.000000 |
| H | 3.231796  | 0.034897  | 0.000000 |
| N | 1.472395  | -1.167275 | 0.000000 |

SI-19

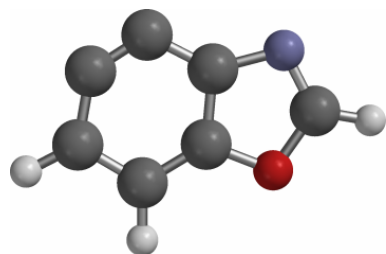

|   |           |           |          |
|---|-----------|-----------|----------|
| C | -0.921033 | -1.489046 | 0.000000 |
| C | -1.074132 | 1.270420  | 0.000000 |
| C | 0.302150  | -0.824390 | 0.000000 |
| C | -1.991360 | -0.842926 | 0.000000 |
| C | -2.266385 | 0.518823  | 0.000000 |
| C | 0.146513  | 0.584426  | 0.000000 |
| H | -3.243735 | 0.987153  | 0.000000 |
| H | -1.103065 | 2.355277  | 0.000000 |
| O | 1.413011  | 1.117992  | 0.000000 |
| C | 2.231781  | 0.019942  | 0.000000 |
| H | 3.292264  | 0.229395  | 0.000000 |
| N | 1.655589  | -1.136273 | 0.000000 |

SI-21

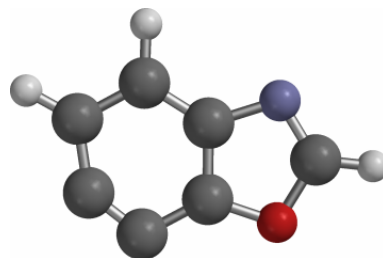

|   |           |           |          |
|---|-----------|-----------|----------|
| H | -1.162187 | -2.364978 | 0.000000 |
| C | -1.099292 | -1.281145 | 0.000000 |
| C | -0.891077 | 1.514507  | 0.000000 |
| C | 0.158555  | -0.647048 | 0.000000 |
| C | -2.276309 | -0.506224 | 0.000000 |
| C | -1.947769 | 0.837536  | 0.000000 |
| C | 0.268175  | 0.763451  | 0.000000 |
| H | -3.268173 | -0.940982 | 0.000000 |
| O | 1.602343  | 1.079580  | 0.000000 |
| C | 2.216961  | -0.145380 | 0.000000 |
| H | 3.297846  | -0.124398 | 0.000000 |
| N | 1.448873  | -1.183301 | 0.000000 |

SI-22

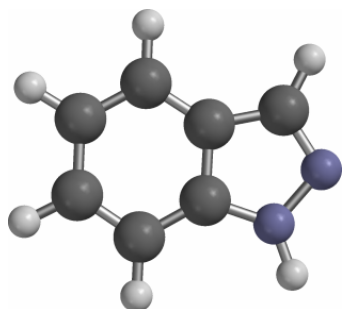

|   |           |           |          |
|---|-----------|-----------|----------|
| H | -0.999303 | -2.519540 | 0.000000 |
| C | -0.973118 | -1.433152 | 0.000000 |
| C | -0.926134 | 1.426835  | 0.000000 |
| C | 0.254464  | -0.744808 | 0.000000 |
| C | -2.145529 | -0.695014 | 0.000000 |
| C | -2.118729 | 0.720014  | 0.000000 |
| C | 0.259450  | 0.674257  | 0.000000 |
| H | -3.104670 | -1.204949 | 0.000000 |
| H | -3.058300 | 1.265971  | 0.000000 |
| H | -0.912681 | 2.513073  | 0.000000 |
| C | 1.638698  | -1.101084 | 0.000000 |
| H | 2.081609  | -2.088683 | 0.000000 |
| N | 2.418863  | -0.034746 | 0.000000 |
| N | 1.578649  | 1.035284  | 0.000000 |
| H | 1.976291  | 1.961543  | 0.000000 |

SI-24

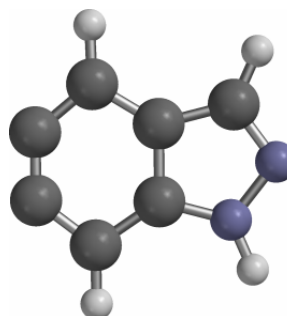

|   |           |           |          |
|---|-----------|-----------|----------|
| H | -1.139314 | -2.572536 | 0.000000 |
| C | -1.098367 | -1.488268 | 0.000000 |
| C | -1.044230 | 1.488055  | 0.000000 |
| C | 0.123362  | -0.753535 | 0.000000 |
| C | -2.148628 | -0.604734 | 0.000000 |
| C | -2.136389 | 0.652820  | 0.000000 |
| C | 0.131592  | 0.684109  | 0.000000 |
| H | -1.031198 | 2.573350  | 0.000000 |
| N | 1.454723  | 1.030731  | 0.000000 |
| H | 1.856791  | 1.955007  | 0.000000 |
| N | 2.291588  | -0.041948 | 0.000000 |
| C | 1.508766  | -1.105906 | 0.000000 |
| H | 1.949766  | -2.094210 | 0.000000 |

SI-23

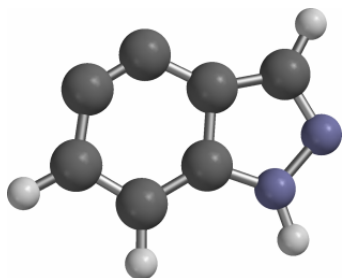

|   |           |           |          |
|---|-----------|-----------|----------|
| C | -0.975395 | -1.478955 | 0.000000 |
| C | -1.116485 | 1.252269  | 0.000000 |
| C | 0.273281  | -0.851378 | 0.000000 |
| C | -2.057795 | -0.863846 | 0.000000 |
| C | -2.305383 | 0.512689  | 0.000000 |
| C | 0.130562  | 0.580745  | 0.000000 |
| H | -3.277569 | 0.993179  | 0.000000 |
| H | -1.158872 | 2.338154  | 0.000000 |
| C | 1.675822  | -1.078329 | 0.000000 |
| H | 2.212297  | -2.017242 | 0.000000 |
| N | 2.346275  | 0.064014  | 0.000000 |
| N | 1.413935  | 1.051045  | 0.000000 |
| H | 1.732450  | 2.007862  | 0.000000 |

SI-25

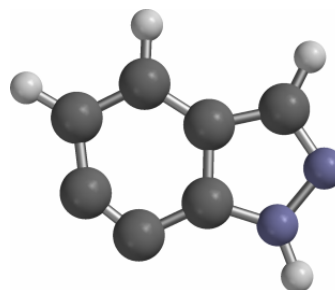

|   |           |           |          |
|---|-----------|-----------|----------|
| H | -1.249819 | -2.345974 | 0.000000 |
| C | -1.158061 | -1.262722 | 0.000000 |
| C | -0.917883 | 1.510424  | 0.000000 |
| C | 0.124125  | -0.660191 | 0.000000 |
| C | -2.324651 | -0.485174 | 0.000000 |
| C | -1.986991 | 0.865228  | 0.000000 |
| C | 0.266774  | 0.768369  | 0.000000 |
| H | -3.318843 | -0.914363 | 0.000000 |
| N | 1.605219  | 1.014635  | 0.000000 |
| H | 2.078659  | 1.904912  | 0.000000 |
| N | 2.344156  | -0.128272 | 0.000000 |
| C | 1.473983  | -1.125317 | 0.000000 |
| H | 1.838605  | -2.144678 | 0.000000 |

SI-26

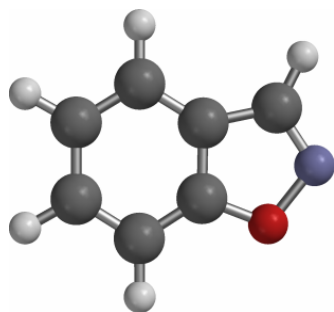

|   |           |           |          |
|---|-----------|-----------|----------|
| H | -0.999503 | -2.531250 | 0.000000 |
| C | -0.968355 | -1.445592 | 0.000000 |
| C | -0.897814 | 1.419067  | 0.000000 |
| C | 0.253405  | -0.753862 | 0.000000 |
| C | -2.136708 | -0.695311 | 0.000000 |
| C | -2.098263 | 0.716209  | 0.000000 |
| C | 0.265213  | 0.647388  | 0.000000 |
| H | -3.099479 | -1.197638 | 0.000000 |
| H | -3.033458 | 1.269149  | 0.000000 |
| H | -0.860841 | 2.502956  | 0.000000 |
| O | 1.542655  | 1.098898  | 0.000000 |
| N | 2.408238  | -0.017411 | 0.000000 |
| C | 1.649712  | -1.080069 | 0.000000 |
| H | 2.121958  | -2.055212 | 0.000000 |

SI-28

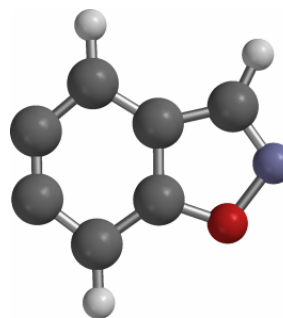

|   |           |           |          |
|---|-----------|-----------|----------|
| C | 2.112681  | -0.626035 | 0.000000 |
| C | 2.124611  | 0.629725  | 0.000000 |
| C | 1.063475  | 1.506844  | 0.000000 |
| H | 1.095336  | 2.591010  | 0.000000 |
| C | -0.140308 | 0.753110  | 0.000000 |
| C | -0.136262 | -0.667031 | 0.000000 |
| C | 1.026059  | -1.474220 | 0.000000 |
| H | 1.002588  | -2.557618 | 0.000000 |
| O | -1.411693 | -1.123029 | 0.000000 |
| N | -2.289029 | -0.016441 | 0.000000 |
| C | -1.541890 | 1.054319  | 0.000000 |
| H | -2.027341 | 2.022707  | 0.000000 |

SI-27

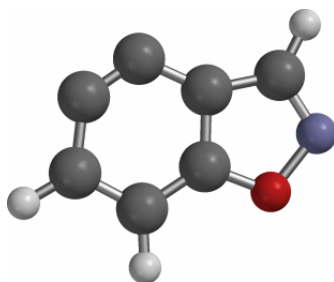

|   |           |           |          |
|---|-----------|-----------|----------|
| H | 3.254364  | -0.988418 | 0.000000 |
| C | 2.280028  | -0.513092 | 0.000000 |
| C | -0.283332 | 0.838389  | 0.000000 |
| C | 1.089275  | -1.256422 | 0.000000 |
| C | 2.022273  | 0.856927  | 0.000000 |
| C | 0.949352  | 1.492414  | 0.000000 |
| C | -0.143235 | -0.572259 | 0.000000 |
| H | 1.113686  | -2.341185 | 0.000000 |
| O | -1.372350 | -1.136815 | 0.000000 |
| N | -2.342934 | -0.109623 | 0.000000 |
| C | -1.698993 | 1.028093  | 0.000000 |
| H | -2.267028 | 1.949588  | 0.000000 |

SI-29

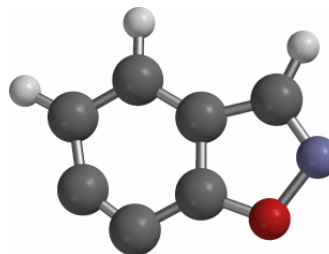

|   |           |           |          |
|---|-----------|-----------|----------|
| C | 1.961199  | -0.833422 | 0.000000 |
| C | -0.145042 | 0.664513  | 0.000000 |
| C | 0.898309  | -1.493065 | 0.000000 |
| C | 2.295087  | 0.513029  | 0.000000 |
| C | 1.122788  | 1.288073  | 0.000000 |
| C | -0.273957 | -0.747286 | 0.000000 |
| H | 3.287296  | 0.946399  | 0.000000 |
| H | 1.205457  | 2.371546  | 0.000000 |
| O | -1.573944 | -1.101292 | 0.000000 |
| N | -2.349513 | 0.081139  | 0.000000 |
| C | -1.513360 | 1.086355  | 0.000000 |
| H | -1.920033 | 2.090693  | 0.000000 |

SI-30

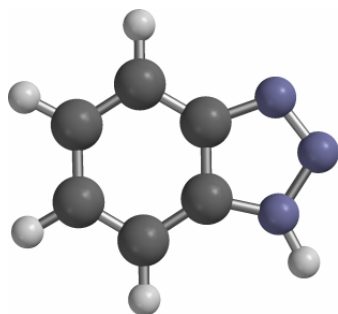

|   |           |           |          |
|---|-----------|-----------|----------|
| H | -0.936129 | -2.514189 | 0.000000 |
| C | -0.936883 | -1.428955 | 0.000000 |
| C | -0.911917 | 1.445163  | 0.000000 |
| C | 0.272326  | -0.715167 | 0.000000 |
| C | -2.111653 | -0.694094 | 0.000000 |
| C | -2.096085 | 0.722163  | 0.000000 |
| C | 0.273445  | 0.695456  | 0.000000 |
| H | -3.068211 | -1.208399 | 0.000000 |
| H | -3.041316 | 1.257887  | 0.000000 |
| H | -0.909411 | 2.530831  | 0.000000 |
| N | 1.580122  | -1.160660 | 0.000000 |
| N | 2.365426  | -0.135220 | 0.000000 |
| N | 1.604321  | 0.998129  | 0.000000 |
| H | 2.067931  | 1.894848  | 0.000000 |

SI-32\*

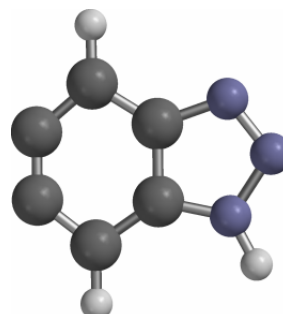

|   |           |           |          |
|---|-----------|-----------|----------|
| C | 2.111054  | -0.657535 | 0.000000 |
| C | -0.140580 | 0.726025  | 0.000000 |
| C | 1.027571  | -1.507014 | 0.000000 |
| C | 2.115777  | 0.600063  | 0.000000 |
| C | 1.065897  | 1.483101  | 0.000000 |
| C | -0.145104 | -0.705099 | 0.000000 |
| H | 1.026985  | -2.591785 | 0.000000 |
| H | 1.081753  | 2.566853  | 0.000000 |
| N | -1.479626 | -0.990074 | 0.000000 |
| H | -1.949564 | -1.883508 | 0.000000 |
| N | -2.235856 | 0.147012  | 0.000000 |
| N | -1.444734 | 1.168288  | 0.000000 |

SI-31\*

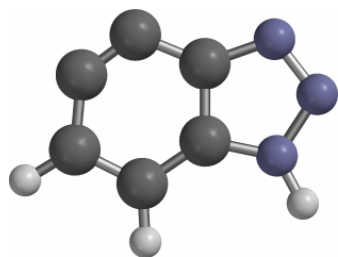

|   |           |           |          |
|---|-----------|-----------|----------|
| H | 3.246004  | -0.990687 | 0.000000 |
| C | 2.267555  | -0.524056 | 0.000000 |
| C | -0.303016 | 0.812434  | 0.000000 |
| C | 1.087424  | -1.280382 | 0.000000 |
| C | 1.997465  | 0.845170  | 0.000000 |
| C | 0.924923  | 1.479359  | 0.000000 |
| C | -0.157550 | -0.610908 | 0.000000 |
| H | 1.142002  | -2.365071 | 0.000000 |
| N | -1.455634 | -1.026632 | 0.000000 |
| H | -1.841442 | -1.960010 | 0.000000 |
| N | -2.318159 | 0.030173  | 0.000000 |
| N | -1.635252 | 1.130937  | 0.000000 |

SI-33\*

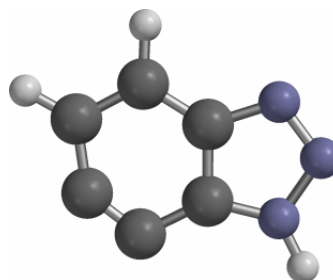

|   |           |           |          |
|---|-----------|-----------|----------|
| C | 1.960354  | -0.853015 | 0.000000 |
| C | -0.152171 | 0.637795  | 0.000000 |
| C | 0.903190  | -1.518541 | 0.000000 |
| C | 2.285749  | 0.501842  | 0.000000 |
| C | 1.115547  | 1.270513  | 0.000000 |
| C | -0.281550 | -0.780817 | 0.000000 |
| H | 3.277641  | 0.936236  | 0.000000 |
| H | 1.176123  | 2.354495  | 0.000000 |
| N | -1.627314 | -0.974688 | 0.000000 |
| H | -2.161204 | -1.831811 | 0.000000 |
| N | -2.287774 | 0.220885  | 0.000000 |
| N | -1.418394 | 1.180748  | 0.000000 |

SI-34

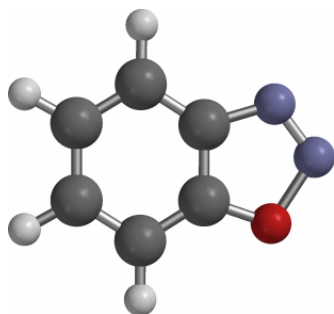

|   |           |           |          |
|---|-----------|-----------|----------|
| H | -0.905502 | -2.525113 | 0.000000 |
| C | -0.914277 | -1.440423 | 0.000000 |
| C | -0.893226 | 1.437103  | 0.000000 |
| C | 0.277618  | -0.708839 | 0.000000 |
| C | -2.093870 | -0.707271 | 0.000000 |
| C | -2.077047 | 0.705796  | 0.000000 |
| C | 0.288306  | 0.691327  | 0.000000 |
| H | -3.048659 | -1.223899 | 0.000000 |
| H | -3.022850 | 1.240363  | 0.000000 |
| H | -0.882883 | 2.521104  | 0.000000 |
| N | 1.605206  | -1.114851 | 0.000000 |
| N | 2.373414  | -0.134781 | 0.000000 |
| O | 1.559592  | 1.109484  | 0.000000 |

SI-36

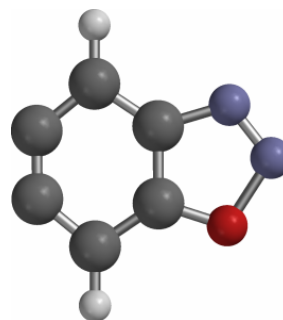

|   |           |           |          |
|---|-----------|-----------|----------|
| C | 2.080315  | -0.624393 | 0.000000 |
| C | 2.096422  | 0.631131  | 0.000000 |
| C | 1.028931  | 1.500466  | 0.000000 |
| H | 1.031549  | 2.584350  | 0.000000 |
| C | -0.154132 | 0.720348  | 0.000000 |
| C | -0.161472 | -0.702672 | 0.000000 |
| C | 1.010689  | -1.494637 | 0.000000 |
| H | 1.009987  | -2.577787 | 0.000000 |
| N | -1.478640 | 1.113308  | 0.000000 |
| N | -2.250173 | 0.136266  | 0.000000 |
| O | -1.433910 | -1.111030 | 0.000000 |

SI-35

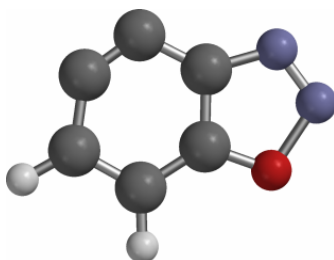

|   |           |           |          |
|---|-----------|-----------|----------|
| C | -0.886904 | -1.518760 | 0.000000 |
| C | -1.086328 | 1.264110  | 0.000000 |
| C | 0.304950  | -0.800420 | 0.000000 |
| C | -1.954175 | -0.869713 | 0.000000 |
| C | -2.256351 | 0.486295  | 0.000000 |
| C | 0.164735  | 0.612466  | 0.000000 |
| H | -3.244213 | 0.932016  | 0.000000 |
| H | -1.143562 | 2.347220  | 0.000000 |
| N | 1.660910  | -1.069062 | 0.000000 |
| N | 2.329630  | -0.023048 | 0.000000 |
| O | 1.380376  | 1.153982  | 0.000000 |

SI-37

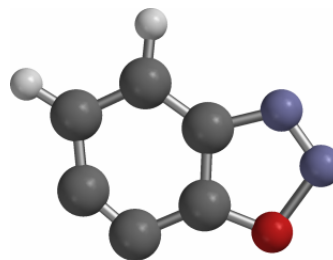

|   |           |           |          |
|---|-----------|-----------|----------|
| H | -1.156787 | -2.354485 | 0.000000 |
| C | -1.100883 | -1.270490 | 0.000000 |
| C | -0.876032 | 1.513961  | 0.000000 |
| C | 0.154521  | -0.625707 | 0.000000 |
| C | -2.271272 | -0.497698 | 0.000000 |
| C | -1.936153 | 0.851632  | 0.000000 |
| C | 0.307259  | 0.783458  | 0.000000 |
| H | -3.264527 | -0.928323 | 0.000000 |
| N | 1.436030  | -1.146131 | 0.000000 |
| N | 2.296597  | -0.247045 | 0.000000 |
| O | 1.600420  | 1.086861  | 0.000000 |

SI-38

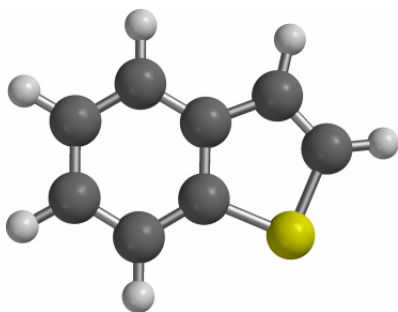

|   |           |           |          |
|---|-----------|-----------|----------|
| H | -0.899493 | -2.505831 | 0.000000 |
| C | -1.037730 | -1.428432 | 0.000000 |
| C | -1.403072 | 1.376939  | 0.000000 |
| C | 0.061047  | -0.563518 | 0.000000 |
| C | -2.313621 | -0.875370 | 0.000000 |
| C | -2.494585 | 0.519883  | 0.000000 |
| C | -0.100360 | 0.844853  | 0.000000 |
| H | -3.180588 | -1.530295 | 0.000000 |
| H | -3.501230 | 0.928780  | 0.000000 |
| H | -1.546493 | 2.454484  | 0.000000 |
| C | 1.166869  | 1.531402  | 0.000000 |
| H | 1.262214  | 2.612224  | 0.000000 |
| C | 2.228432  | 0.685436  | 0.000000 |
| H | 3.279705  | 0.942647  | 0.000000 |
| S | 1.763672  | -1.003957 | 0.000000 |

SI-40

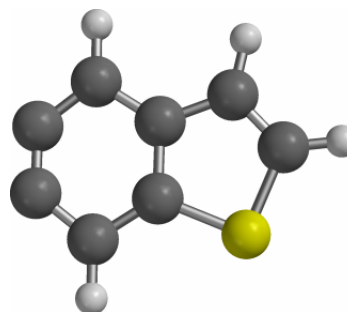

|   |           |           |          |
|---|-----------|-----------|----------|
| H | -1.753502 | -2.450830 | 0.000000 |
| C | -1.569734 | -1.381101 | 0.000000 |
| C | -1.097197 | 1.533036  | 0.000000 |
| C | -0.253135 | -0.835598 | 0.000000 |
| C | -2.499716 | -0.368148 | 0.000000 |
| C | -2.305943 | 0.871319  | 0.000000 |
| C | -0.045535 | 0.584193  | 0.000000 |
| H | -0.927170 | 2.604849  | 0.000000 |
| S | 1.675566  | 0.960362  | 0.000000 |
| C | 2.085329  | -0.743813 | 0.000000 |
| H | 3.128078  | -1.034963 | 0.000000 |
| C | 0.997540  | -1.554113 | 0.000000 |
| H | 1.058263  | -2.637263 | 0.000000 |

SI-39

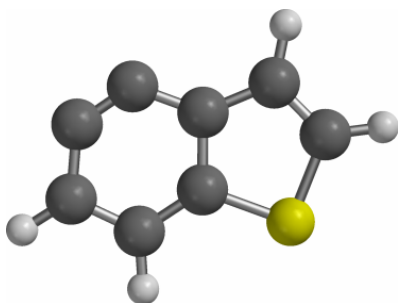

|   |           |           |          |
|---|-----------|-----------|----------|
| C | -1.442077 | -1.403698 | 0.000000 |
| C | -1.211176 | 1.284790  | 0.000000 |
| C | -0.115006 | -0.975945 | 0.000000 |
| C | -2.443392 | -0.661077 | 0.000000 |
| C | -2.502992 | 0.730041  | 0.000000 |
| C | -0.066122 | 0.461571  | 0.000000 |
| H | -3.395649 | 1.345546  | 0.000000 |
| H | -1.098656 | 2.366030  | 0.000000 |
| S | 1.608343  | 0.996988  | 0.000000 |
| C | 2.182454  | -0.655847 | 0.000000 |
| H | 3.249219  | -0.838378 | 0.000000 |
| C | 1.184831  | -1.579812 | 0.000000 |
| H | 1.350836  | -2.650620 | 0.000000 |

SI-41

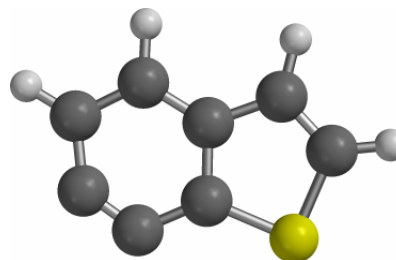

|   |           |           |          |
|---|-----------|-----------|----------|
| H | -1.792994 | -2.254537 | 0.000000 |
| C | -1.581148 | -1.187757 | 0.000000 |
| C | -1.023267 | 1.480767  | 0.000000 |
| C | -0.231910 | -0.753280 | 0.000000 |
| C | -2.657970 | -0.285806 | 0.000000 |
| C | -2.183487 | 1.018397  | 0.000000 |
| C | 0.084472  | 0.648413  | 0.000000 |
| H | -3.692584 | -0.608409 | 0.000000 |
| S | 1.813658  | 0.926812  | 0.000000 |
| C | 2.107328  | -0.800997 | 0.000000 |
| H | 3.128753  | -1.158956 | 0.000000 |
| C | 0.971373  | -1.546444 | 0.000000 |
| H | 0.973932  | -2.631337 | 0.000000 |

SI-42

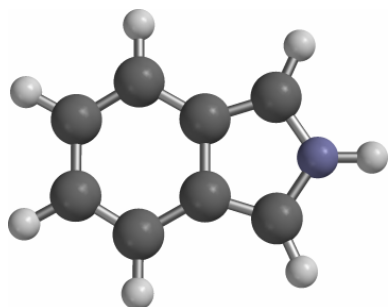

|   |           |          |           |
|---|-----------|----------|-----------|
| C | 0.714999  | 0.000000 | 2.153016  |
| H | 1.238782  | 0.000000 | 3.105450  |
| C | 1.430766  | 0.000000 | 0.980872  |
| H | 2.518142  | 0.000000 | 0.992527  |
| C | -0.714999 | 0.000000 | 2.153016  |
| H | -1.238782 | 0.000000 | 3.105450  |
| C | -1.430766 | 0.000000 | 0.980872  |
| H | -2.518142 | 0.000000 | 0.992527  |
| C | 0.726058  | 0.000000 | -0.255083 |
| C | -0.726058 | 0.000000 | -0.255083 |
| C | 1.134924  | 0.000000 | -1.587443 |
| H | 2.117187  | 0.000000 | -2.036008 |
| C | -1.134924 | 0.000000 | -1.587443 |
| H | -2.117187 | 0.000000 | -2.036008 |
| N | 0.000000  | 0.000000 | -2.354387 |
| H | 0.000000  | 0.000000 | -3.363930 |

SI-44

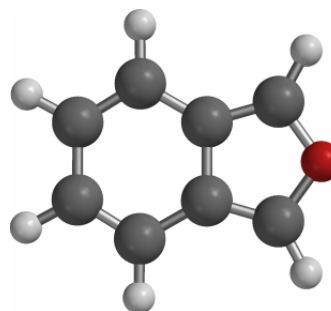

|   |           |          |           |
|---|-----------|----------|-----------|
| C | -1.437862 | 0.000000 | 0.981922  |
| H | -2.524388 | 0.000000 | 0.993307  |
| C | -0.719051 | 0.000000 | 2.146076  |
| H | -1.238232 | 0.000000 | 3.100707  |
| C | 0.719051  | 0.000000 | 2.146076  |
| H | 1.238232  | 0.000000 | 3.100707  |
| C | 1.437862  | 0.000000 | 0.981922  |
| H | 2.524388  | 0.000000 | 0.993307  |
| C | 0.727608  | 0.000000 | -0.258078 |
| C | -0.727608 | 0.000000 | -0.258078 |
| C | -1.103412 | 0.000000 | -1.581820 |
| H | -2.052316 | 0.000000 | -2.094975 |
| C | 1.103412  | 0.000000 | -1.581820 |
| H | 2.052316  | 0.000000 | -2.094975 |
| O | 0.000000  | 0.000000 | -2.373275 |

SI-43

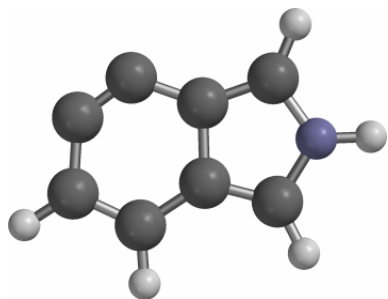

|   |           |           |          |
|---|-----------|-----------|----------|
| C | -0.987781 | -1.455736 | 0.000000 |
| C | -2.070407 | -0.851822 | 0.000000 |
| C | -2.333624 | 0.535957  | 0.000000 |
| H | -3.312355 | 1.002831  | 0.000000 |
| C | -1.158667 | 1.274216  | 0.000000 |
| H | -1.217946 | 2.360398  | 0.000000 |
| C | 0.127893  | 0.644704  | 0.000000 |
| C | 0.271838  | -0.825035 | 0.000000 |
| C | 1.626709  | -1.116069 | 0.000000 |
| H | 2.160843  | -2.053482 | 0.000000 |
| C | 1.425233  | 1.152611  | 0.000000 |
| H | 1.795303  | 2.167469  | 0.000000 |
| N | 2.285838  | 0.088489  | 0.000000 |
| H | 3.291301  | 0.178124  | 0.000000 |

SI-45

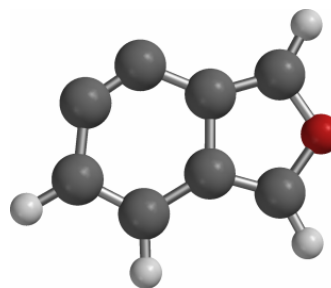

|   |           |           |          |
|---|-----------|-----------|----------|
| C | 1.148545  | -1.278632 | 0.000000 |
| H | 1.211275  | -2.363931 | 0.000000 |
| C | 2.313730  | -0.534985 | 0.000000 |
| H | 3.295453  | -0.994617 | 0.000000 |
| C | 2.043174  | 0.856214  | 0.000000 |
| C | 0.968509  | 1.469001  | 0.000000 |
| C | -0.290919 | 0.826503  | 0.000000 |
| C | -0.144496 | -0.647293 | 0.000000 |
| C | -1.635862 | 1.083434  | 0.000000 |
| H | -2.234415 | 1.979996  | 0.000000 |
| C | -1.433876 | -1.124356 | 0.000000 |
| H | -1.869391 | -2.111880 | 0.000000 |
| O | -2.317760 | -0.094660 | 0.000000 |

SI-46

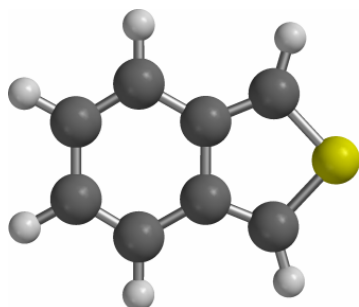

|   |           |          |           |
|---|-----------|----------|-----------|
| C | -1.426903 | 0.000000 | 1.306048  |
| H | -2.513713 | 0.000000 | 1.311467  |
| C | -0.716954 | 0.000000 | 2.475314  |
| H | -1.241222 | 0.000000 | 3.427216  |
| C | 0.716954  | 0.000000 | 2.475314  |
| H | 1.241222  | 0.000000 | 3.427216  |
| C | 1.426903  | 0.000000 | 1.306048  |
| H | 2.513713  | 0.000000 | 1.311467  |
| C | -0.727176 | 0.000000 | 0.056999  |
| C | 0.727176  | 0.000000 | 0.056999  |
| C | 1.248444  | 0.000000 | -1.226762 |
| H | 2.287221  | 0.000000 | -1.527599 |
| C | -1.248444 | 0.000000 | -1.226762 |
| H | -2.287221 | 0.000000 | -1.527599 |
| S | 0.000000  | 0.000000 | -2.407968 |

SI-48

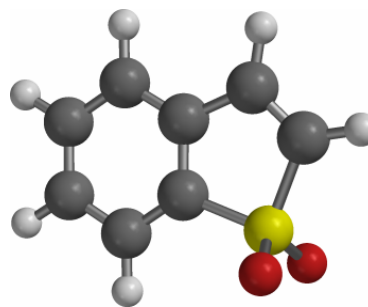

|   |           |           |           |
|---|-----------|-----------|-----------|
| H | 2.572660  | -2.153310 | 0.000000  |
| C | 2.159369  | -1.148150 | 0.000000  |
| C | 1.095469  | 1.472599  | 0.000000  |
| C | 0.779400  | -0.951912 | 0.000000  |
| C | 3.004363  | -0.031581 | 0.000000  |
| C | 2.482444  | 1.263916  | 0.000000  |
| C | 0.278474  | 0.356931  | 0.000000  |
| H | 4.080921  | -0.176051 | 0.000000  |
| H | 3.153379  | 2.117899  | 0.000000  |
| H | 0.678631  | 2.475128  | 0.000000  |
| C | -0.284734 | -1.973525 | 0.000000  |
| H | -0.050258 | -3.034000 | 0.000000  |
| C | -1.531543 | -1.487306 | 0.000000  |
| H | -2.476553 | -2.014479 | 0.000000  |
| S | -1.524537 | 0.310849  | 0.000000  |
| O | -2.059964 | 0.825665  | -1.268547 |
| O | -2.059964 | 0.825665  | 1.268547  |

SI-47

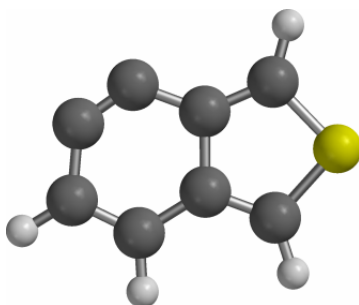

|   |           |           |          |
|---|-----------|-----------|----------|
| C | 1.467868  | 1.278860  | 0.000000 |
| H | 1.502876  | 2.365699  | 0.000000 |
| C | 2.650536  | 0.565431  | 0.000000 |
| H | 3.622468  | 1.045699  | 0.000000 |
| C | 2.406260  | -0.828826 | 0.000000 |
| C | 1.336829  | -1.449816 | 0.000000 |
| C | 0.056152  | -0.844600 | 0.000000 |
| C | 0.177322  | 0.632288  | 0.000000 |
| C | -1.251931 | -1.276419 | 0.000000 |
| H | -1.624650 | -2.290627 | 0.000000 |
| C | -1.072572 | 1.225912  | 0.000000 |
| H | -1.312627 | 2.280577  | 0.000000 |
| S | -2.338359 | 0.060563  | 0.000000 |

SI-49

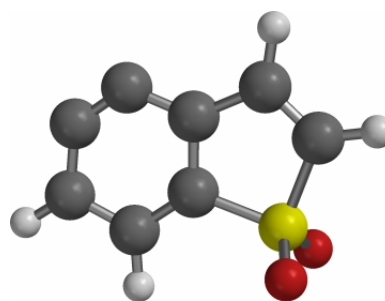

|   |           |           |           |
|---|-----------|-----------|-----------|
| C | 2.181325  | -1.165656 | 0.000000  |
| C | 1.265635  | 1.375674  | 0.000000  |
| C | 0.801104  | -1.071327 | 0.000000  |
| C | 2.956528  | -0.180711 | 0.000000  |
| C | 2.671926  | 1.169276  | 0.000000  |
| C | 0.395623  | 0.288676  | 0.000000  |
| H | 3.375642  | 1.993608  | 0.000000  |
| H | 0.876561  | 2.390250  | 0.000000  |
| S | -1.412121 | 0.336804  | 0.000000  |
| O | -1.918560 | 0.875503  | 1.269398  |
| O | -1.918560 | 0.875503  | -1.269398 |
| C | -1.523451 | -1.459105 | 0.000000  |
| H | -2.501051 | -1.923758 | 0.000000  |
| C | -0.312448 | -2.030016 | 0.000000  |
| H | -0.142551 | -3.101493 | 0.000000  |



SI-50

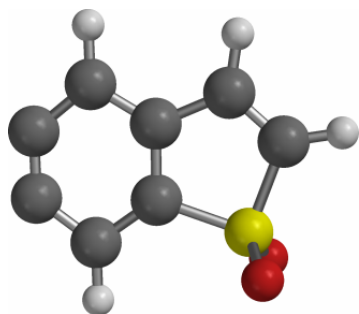

|   |           |           |           |
|---|-----------|-----------|-----------|
| S | -1.433466 | 0.277308  | 0.000000  |
| O | -1.985238 | 0.770032  | -1.269179 |
| O | -1.985238 | 0.770032  | 1.269179  |
| C | -1.359252 | -1.516677 | 0.000000  |
| H | -2.277888 | -2.089407 | 0.000000  |
| C | -0.090427 | -1.944448 | 0.000000  |
| H | 0.188155  | -2.994170 | 0.000000  |
| C | 0.935574  | -0.884484 | 0.000000  |
| C | 2.456916  | 1.288218  | 0.000000  |
| C | 0.372510  | 0.413964  | 0.000000  |
| C | 2.335372  | -1.074424 | 0.000000  |
| C | 2.979924  | 0.152857  | 0.000000  |
| C | 1.105046  | 1.605938  | 0.000000  |
| H | 2.791932  | -2.059096 | 0.000000  |
| H | 0.649663  | 2.590115  | 0.000000  |

SI-52

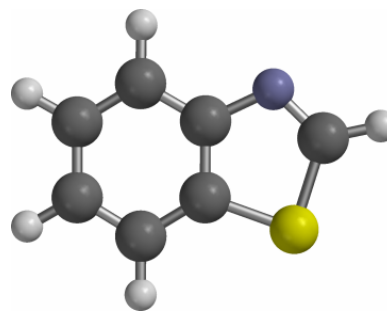

|   |           |           |          |
|---|-----------|-----------|----------|
| H | -1.489381 | -2.454492 | 0.000000 |
| C | -1.373124 | -1.375369 | 0.000000 |
| C | -1.023525 | 1.441413  | 0.000000 |
| C | -0.082921 | -0.825308 | 0.000000 |
| C | -2.468176 | -0.521130 | 0.000000 |
| C | -2.294780 | 0.874581  | 0.000000 |
| C | 0.078276  | 0.581963  | 0.000000 |
| H | -3.472903 | -0.934073 | 0.000000 |
| H | -3.166380 | 1.523227  | 0.000000 |
| H | -0.895658 | 2.519553  | 0.000000 |
| S | 1.789875  | 0.965111  | 0.000000 |
| C | 2.118829  | -0.772856 | 0.000000 |
| H | 3.146868  | -1.119380 | 0.000000 |
| N | 1.096359  | -1.560254 | 0.000000 |

SI-51

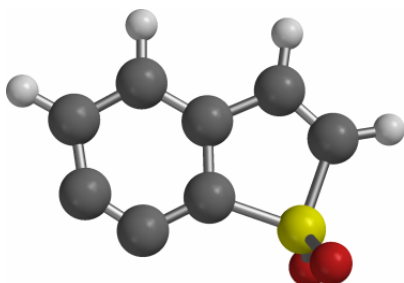

|   |           |           |           |
|---|-----------|-----------|-----------|
| H | 2.719526  | -1.947495 | 0.000000  |
| C | 2.276825  | -0.954543 | 0.000000  |
| C | 1.151898  | 1.519672  | 0.000000  |
| C | 0.879419  | -0.815840 | 0.000000  |
| C | 3.134414  | 0.174593  | 0.000000  |
| C | 2.392648  | 1.334900  | 0.000000  |
| C | 0.274620  | 0.466220  | 0.000000  |
| H | 4.214449  | 0.083342  | 0.000000  |
| S | -1.526524 | 0.306888  | 0.000000  |
| O | -2.090788 | 0.779816  | 1.270506  |
| O | -2.090788 | 0.779816  | -1.270506 |
| C | -1.401645 | -1.487939 | 0.000000  |
| H | -2.308001 | -2.079622 | 0.000000  |
| C | -0.126768 | -1.897031 | 0.000000  |
| H | 0.166429  | -2.942831 | 0.000000  |

SI-53

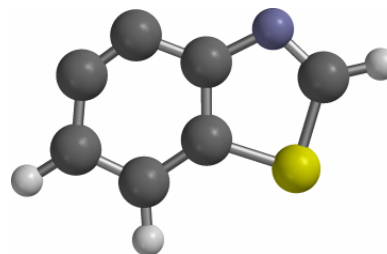

|   |           |           |          |
|---|-----------|-----------|----------|
| C | -1.373162 | -1.430147 | 0.000000 |
| C | -1.203575 | 1.290227  | 0.000000 |
| C | -0.066255 | -0.947902 | 0.000000 |
| C | -2.374265 | -0.684821 | 0.000000 |
| C | -2.480613 | 0.699153  | 0.000000 |
| C | -0.044380 | 0.490272  | 0.000000 |
| H | -3.390888 | 1.287663  | 0.000000 |
| H | -1.119535 | 2.373588  | 0.000000 |
| S | 1.631356  | 1.006437  | 0.000000 |
| C | 2.108835  | -0.693714 | 0.000000 |
| H | 3.163239  | -0.947552 | 0.000000 |
| N | 1.161034  | -1.573230 | 0.000000 |

SI-54

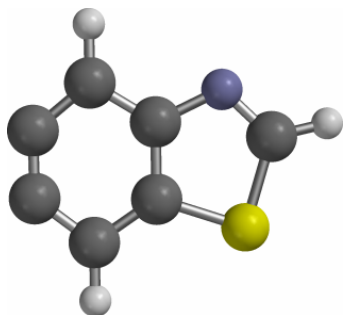

|   |           |           |          |
|---|-----------|-----------|----------|
| H | -1.652665 | -2.480422 | 0.000000 |
| C | -1.512542 | -1.405482 | 0.000000 |
| C | -1.101969 | 1.529547  | 0.000000 |
| C | -0.216749 | -0.821647 | 0.000000 |
| C | -2.461639 | -0.409606 | 0.000000 |
| C | -2.293591 | 0.832776  | 0.000000 |
| C | -0.034195 | 0.604210  | 0.000000 |
| H | -0.963925 | 2.605446  | 0.000000 |
| S | 1.687474  | 0.949683  | 0.000000 |
| C | 1.989392  | -0.793223 | 0.000000 |
| H | 3.012237  | -1.155654 | 0.000000 |
| N | 0.954847  | -1.563219 | 0.000000 |

SI-56

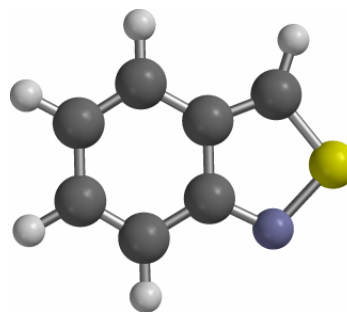

|   |           |           |          |
|---|-----------|-----------|----------|
| C | 1.266471  | -1.417250 | 0.000000 |
| H | 1.246032  | -2.502213 | 0.000000 |
| C | 2.439502  | -0.710333 | 0.000000 |
| H | 3.387446  | -1.241723 | 0.000000 |
| C | 2.455180  | 0.722932  | 0.000000 |
| H | 3.412705  | 1.236309  | 0.000000 |
| C | 1.292829  | 1.447019  | 0.000000 |
| H | 1.307355  | 2.533396  | 0.000000 |
| C | 0.045558  | 0.750798  | 0.000000 |
| C | 0.030125  | -0.699819 | 0.000000 |
| N | -1.172303 | -1.287324 | 0.000000 |
| S | -2.331232 | -0.097969 | 0.000000 |
| C | -1.257338 | 1.229012  | 0.000000 |
| H | -1.598580 | 2.256457  | 0.000000 |

SI-55

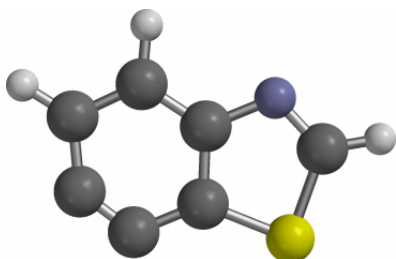

|   |           |           |          |
|---|-----------|-----------|----------|
| H | -1.709902 | -2.247667 | 0.000000 |
| C | -1.534154 | -1.176145 | 0.000000 |
| C | -1.002752 | 1.511027  | 0.000000 |
| C | -0.195345 | -0.714750 | 0.000000 |
| C | -2.618245 | -0.285176 | 0.000000 |
| C | -2.152966 | 1.022423  | 0.000000 |
| C | 0.109509  | 0.687463  | 0.000000 |
| H | -3.650766 | -0.613799 | 0.000000 |
| S | 1.845531  | 0.918008  | 0.000000 |
| C | 2.007318  | -0.843667 | 0.000000 |
| H | 2.998817  | -1.283732 | 0.000000 |
| N | 0.918546  | -1.539326 | 0.000000 |

SI-57

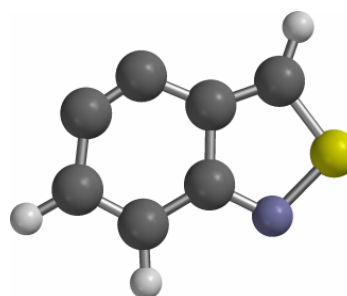

|   |           |           |          |
|---|-----------|-----------|----------|
| C | 2.630099  | 0.514878  | 0.000000 |
| H | 3.608812  | 0.981611  | 0.000000 |
| C | 1.457615  | 1.242615  | 0.000000 |
| H | 1.480929  | 2.327943  | 0.000000 |
| C | 2.374224  | -0.878063 | 0.000000 |
| C | 1.302687  | -1.496916 | 0.000000 |
| C | 0.163402  | 0.599029  | 0.000000 |
| C | 0.035171  | -0.873165 | 0.000000 |
| N | -0.987898 | 1.271898  | 0.000000 |
| C | -1.296228 | -1.237919 | 0.000000 |
| H | -1.724773 | -2.231109 | 0.000000 |
| S | -2.246535 | 0.184546  | 0.000000 |

SI-58

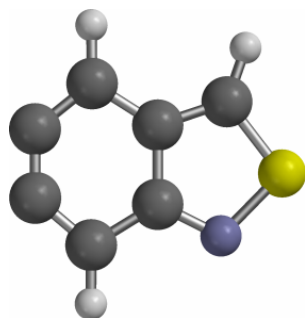

|   |           |           |          |
|---|-----------|-----------|----------|
| C | 1.136110  | -1.227667 | 0.000000 |
| H | 1.479949  | -2.254170 | 0.000000 |
| S | 2.211691  | 0.097381  | 0.000000 |
| N | 1.058049  | 1.286591  | 0.000000 |
| C | -0.170256 | -0.759794 | 0.000000 |
| C | -0.148462 | 0.714249  | 0.000000 |
| C | -1.413163 | -1.503676 | 0.000000 |
| H | -1.444739 | -2.588514 | 0.000000 |
| C | -2.456852 | -0.633652 | 0.000000 |
| C | -2.430362 | 0.632052  | 0.000000 |
| C | -1.380314 | 1.487800  | 0.000000 |
| H | -1.367778 | 2.571568  | 0.000000 |

SI-60

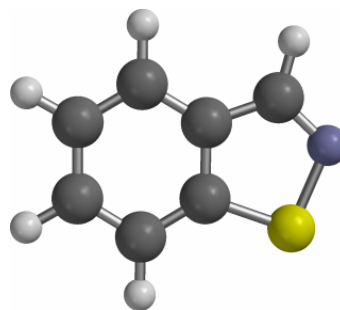

|   |           |           |          |
|---|-----------|-----------|----------|
| H | -1.569175 | -2.440009 | 0.000000 |
| C | -1.418433 | -1.363724 | 0.000000 |
| C | -1.018942 | 1.447614  | 0.000000 |
| C | -0.115571 | -0.832955 | 0.000000 |
| C | -2.497496 | -0.493818 | 0.000000 |
| C | -2.296047 | 0.901930  | 0.000000 |
| C | 0.072821  | 0.569082  | 0.000000 |
| H | -3.510290 | -0.886299 | 0.000000 |
| H | -3.157464 | 1.564251  | 0.000000 |
| H | -0.875590 | 2.524005  | 0.000000 |
| S | 1.790481  | 0.896219  | 0.000000 |
| N | 2.233064  | -0.747947 | 0.000000 |
| C | 1.162915  | -1.495627 | 0.000000 |
| H | 1.289931  | -2.576277 | 0.000000 |

SI-59

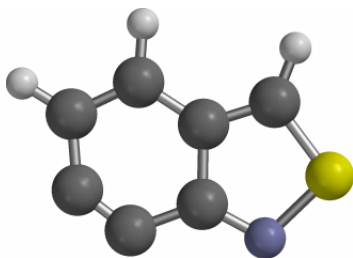

|   |           |           |          |
|---|-----------|-----------|----------|
| C | 2.634978  | 0.481423  | 0.000000 |
| H | 3.629668  | 0.911814  | 0.000000 |
| C | 1.486191  | 1.251144  | 0.000000 |
| H | 1.568129  | 2.335081  | 0.000000 |
| C | 2.316357  | -0.893997 | 0.000000 |
| C | 1.231870  | -1.491090 | 0.000000 |
| C | 0.176377  | 0.653719  | 0.000000 |
| C | -0.014456 | -0.814506 | 0.000000 |
| C | -1.071343 | 1.254720  | 0.000000 |
| H | -1.311717 | 2.310470  | 0.000000 |
| N | -1.260727 | -1.265828 | 0.000000 |
| S | -2.283195 | 0.047886  | 0.000000 |

SI-61

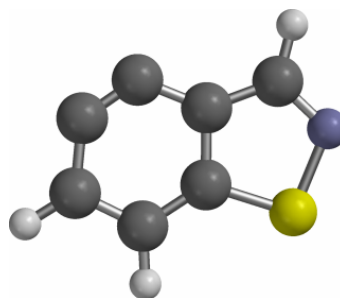

|   |           |           |          |
|---|-----------|-----------|----------|
| C | 2.510649  | 0.684893  | 0.000000 |
| H | 3.422828  | 1.270993  | 0.000000 |
| C | 1.239078  | 1.282643  | 0.000000 |
| H | 1.163627  | 2.366733  | 0.000000 |
| C | 2.408366  | -0.703029 | 0.000000 |
| C | 1.398399  | -1.433581 | 0.000000 |
| C | 0.090617  | -0.944298 | 0.000000 |
| C | 0.069378  | 0.491304  | 0.000000 |
| S | -1.605350 | 0.984083  | 0.000000 |
| N | -2.220065 | -0.599943 | 0.000000 |
| C | -1.243273 | -1.469040 | 0.000000 |
| H | -1.487797 | -2.527748 | 0.000000 |

SI-62

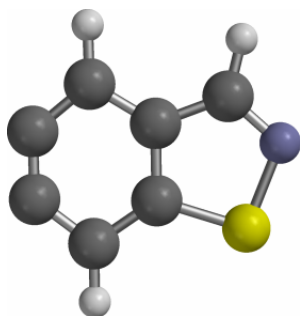

|   |           |           |          |
|---|-----------|-----------|----------|
| C | 2.316456  | -0.816487 | 0.000000 |
| C | 2.482104  | 0.428287  | 0.000000 |
| C | 1.525411  | 1.413436  | 0.000000 |
| H | 1.676199  | 2.488200  | 0.000000 |
| C | 0.228605  | 0.819782  | 0.000000 |
| C | 0.052314  | -0.599791 | 0.000000 |
| C | 1.133438  | -1.519931 | 0.000000 |
| H | 0.999975  | -2.596442 | 0.000000 |
| S | -1.667818 | -0.933254 | 0.000000 |
| N | -2.124588 | 0.708342  | 0.000000 |
| C | -1.060289 | 1.463266  | 0.000000 |
| H | -1.197296 | 2.542663  | 0.000000 |

SI-64

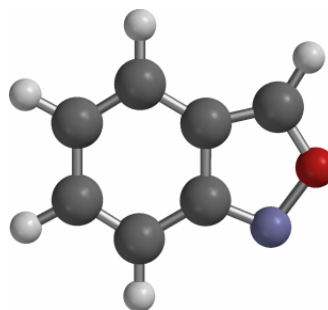

|   |           |           |          |
|---|-----------|-----------|----------|
| C | 0.915939  | -1.448130 | 0.000000 |
| H | 0.881874  | -2.532527 | 0.000000 |
| C | 2.095275  | -0.753723 | 0.000000 |
| H | 3.035763  | -1.298092 | 0.000000 |
| C | 2.139907  | 0.683412  | 0.000000 |
| H | 3.109857  | 1.172239  | 0.000000 |
| C | 0.996852  | 1.436749  | 0.000000 |
| H | 1.035174  | 2.522073  | 0.000000 |
| C | -0.252387 | 0.749948  | 0.000000 |
| C | -0.295848 | -0.691578 | 0.000000 |
| N | -1.540988 | -1.156530 | 0.000000 |
| O | -2.337756 | -0.009778 | 0.000000 |
| C | -1.583038 | 1.095198  | 0.000000 |
| H | -2.118116 | 2.033995  | 0.000000 |

SI-63

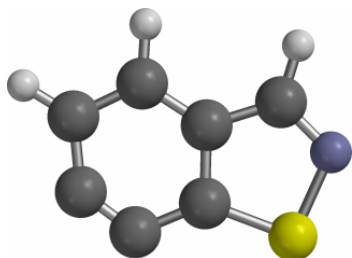

|   |           |           |          |
|---|-----------|-----------|----------|
| C | 2.167467  | 1.008952  | 0.000000 |
| C | 1.018021  | 1.494558  | 0.000000 |
| C | 2.624966  | -0.303850 | 0.000000 |
| H | 3.655184  | -0.639263 | 0.000000 |
| C | 1.536715  | -1.189551 | 0.000000 |
| H | 1.728220  | -2.259920 | 0.000000 |
| C | 0.198203  | -0.723497 | 0.000000 |
| C | -0.105434 | 0.678266  | 0.000000 |
| S | -1.833447 | 0.890537  | 0.000000 |
| N | -2.154203 | -0.780843 | 0.000000 |
| C | -1.037379 | -1.460180 | 0.000000 |
| H | -1.102615 | -2.546220 | 0.000000 |

SI-65

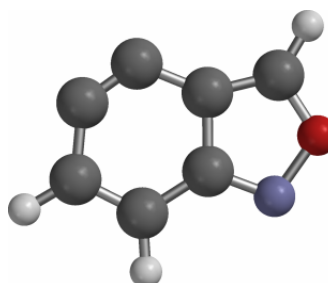

|   |           |           |          |
|---|-----------|-----------|----------|
| C | 2.016840  | 0.897412  | 0.000000 |
| C | 0.942278  | 1.511429  | 0.000000 |
| C | 2.299192  | -0.491126 | 0.000000 |
| H | 3.287065  | -0.937731 | 0.000000 |
| C | 1.145825  | -1.250662 | 0.000000 |
| H | 1.199508  | -2.334726 | 0.000000 |
| C | -0.299614 | 0.841301  | 0.000000 |
| C | -0.148905 | -0.615767 | 0.000000 |
| C | -1.657358 | 1.019280  | 0.000000 |
| H | -2.308206 | 1.880876  | 0.000000 |
| N | -1.330066 | -1.218184 | 0.000000 |
| O | -2.261259 | -0.178463 | 0.000000 |

SI-66

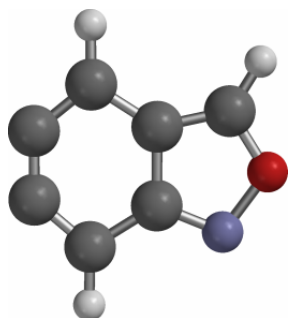

|   |           |           |          |
|---|-----------|-----------|----------|
| N | 1.395181  | -1.208174 | 0.000000 |
| O | 2.226340  | -0.089651 | 0.000000 |
| C | 1.509660  | 1.040791  | 0.000000 |
| H | 2.078011  | 1.959680  | 0.000000 |
| C | 0.165816  | 0.749804  | 0.000000 |
| C | 0.163034  | -0.711759 | 0.000000 |
| C | -1.056417 | 1.526396  | 0.000000 |
| H | -1.071552 | 2.611163  | 0.000000 |
| C | -2.109296 | 0.668933  | 0.000000 |
| C | -2.102103 | -0.598928 | 0.000000 |
| C | -1.072826 | -1.479096 | 0.000000 |
| H | -1.086124 | -2.562632 | 0.000000 |

SI-68

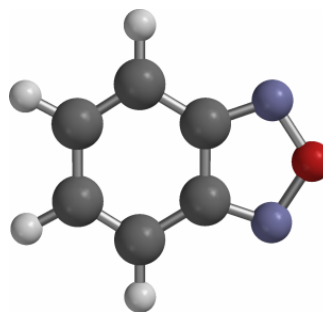

|   |           |          |           |
|---|-----------|----------|-----------|
| C | 0.720345  | 0.000000 | 2.078185  |
| H | 1.232909  | 0.000000 | 3.035809  |
| C | 1.451187  | 0.000000 | 0.921510  |
| H | 2.535637  | 0.000000 | 0.916825  |
| C | 0.718347  | 0.000000 | -0.302124 |
| C | -0.718347 | 0.000000 | -0.302124 |
| C | -1.451187 | 0.000000 | 0.921510  |
| H | -2.535637 | 0.000000 | 0.916825  |
| C | -0.720345 | 0.000000 | 2.078185  |
| H | -1.232909 | 0.000000 | 3.035809  |
| N | 1.143822  | 0.000000 | -1.554690 |
| N | -1.143822 | 0.000000 | -1.554690 |
| O | 0.000000  | 0.000000 | -2.306189 |

SI-67

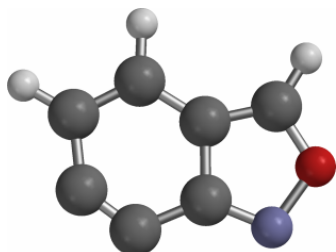

|   |           |           |          |
|---|-----------|-----------|----------|
| C | 1.970199  | 0.892785  | 0.000000 |
| C | 0.890472  | 1.498075  | 0.000000 |
| C | 2.301380  | -0.481945 | 0.000000 |
| H | 3.300005  | -0.902086 | 0.000000 |
| C | 1.161444  | -1.265809 | 0.000000 |
| H | 1.255600  | -2.348317 | 0.000000 |
| C | -0.335755 | 0.790221  | 0.000000 |
| C | -0.141532 | -0.663817 | 0.000000 |
| N | -1.610604 | 1.136626  | 0.000000 |
| C | -1.436710 | -1.118801 | 0.000000 |
| H | -1.891662 | -2.099446 | 0.000000 |
| O | -2.290193 | -0.086468 | 0.000000 |

SI-69

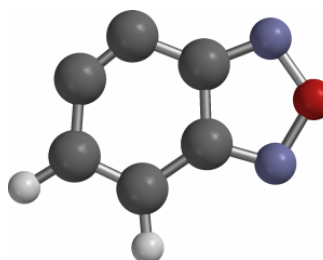

|   |           |           |          |
|---|-----------|-----------|----------|
| C | 1.103863  | -1.284942 | 0.000000 |
| H | 1.156735  | -2.368694 | 0.000000 |
| C | 2.254403  | -0.521853 | 0.000000 |
| H | 3.245348  | -0.960128 | 0.000000 |
| C | 1.956689  | 0.862895  | 0.000000 |
| C | 0.898782  | 1.505208  | 0.000000 |
| C | -0.333981 | 0.813808  | 0.000000 |
| C | -0.182373 | -0.638409 | 0.000000 |
| N | -1.388548 | -1.171286 | 0.000000 |
| N | -1.614953 | 1.115742  | 0.000000 |
| O | -2.247140 | -0.101280 | 0.000000 |

SI-70

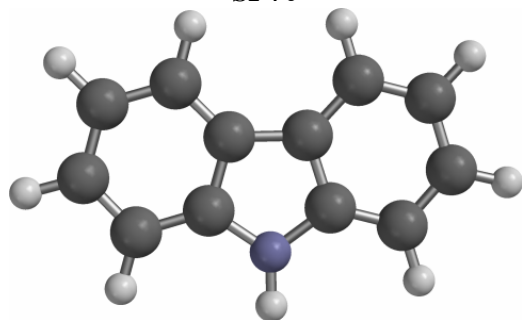

|   |           |          |           |
|---|-----------|----------|-----------|
| H | -1.406069 | 0.000000 | 2.558366  |
| C | -1.698575 | 0.000000 | 1.511352  |
| C | -2.481856 | 0.000000 | -1.219974 |
| C | -0.725217 | 0.000000 | 0.505213  |
| C | -3.044395 | 0.000000 | 1.154675  |
| C | -3.428441 | 0.000000 | -0.197894 |
| C | -1.133657 | 0.000000 | -0.855344 |
| H | -3.807626 | 0.000000 | 1.927725  |
| H | -4.484561 | 0.000000 | -0.454109 |
| H | -2.785201 | 0.000000 | -2.263745 |
| C | 0.725217  | 0.000000 | 0.505213  |
| C | 3.428441  | 0.000000 | -0.197894 |
| C | 1.698575  | 0.000000 | 1.511352  |
| C | 1.133657  | 0.000000 | -0.855344 |
| C | 2.481856  | 0.000000 | -1.219974 |
| C | 3.044395  | 0.000000 | 1.154675  |
| H | 1.406069  | 0.000000 | 2.558366  |
| H | 2.785201  | 0.000000 | -2.263745 |
| H | 3.807626  | 0.000000 | 1.927725  |
| H | 4.484561  | 0.000000 | -0.454109 |
| N | 0.000000  | 0.000000 | -1.653872 |
| H | 0.000000  | 0.000000 | -2.661728 |

SI-72

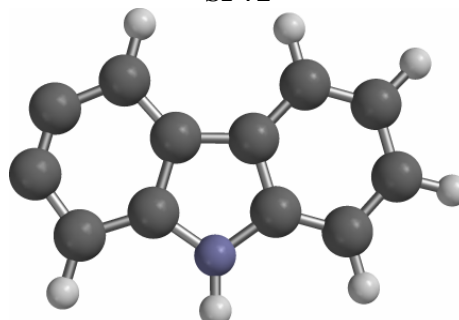

|   |           |           |          |
|---|-----------|-----------|----------|
| H | -1.457794 | -2.662883 | 0.000000 |
| C | -1.757343 | -1.619762 | 0.000000 |
| C | -2.626627 | 1.210583  | 0.000000 |
| C | -0.827344 | -0.551794 | 0.000000 |
| C | -3.041901 | -1.116348 | 0.000000 |
| C | -3.419739 | 0.078847  | 0.000000 |
| C | -1.266667 | 0.819828  | 0.000000 |
| H | -2.949454 | 2.247467  | 0.000000 |
| C | 0.623510  | -0.518045 | 0.000000 |
| C | 1.007362  | 0.848663  | 0.000000 |
| N | -0.139931 | 1.628330  | 0.000000 |
| H | -0.154330 | 2.636086  | 0.000000 |
| C | 1.615109  | -1.506720 | 0.000000 |
| H | 1.342567  | -2.559004 | 0.000000 |
| H | 3.730666  | -1.885330 | 0.000000 |
| C | 2.954005  | -1.125948 | 0.000000 |
| H | 4.364799  | 0.508604  | 0.000000 |
| C | 3.313592  | 0.233273  | 0.000000 |
| H | 2.632149  | 2.287180  | 0.000000 |
| C | 2.348555  | 1.237935  | 0.000000 |

SI-71

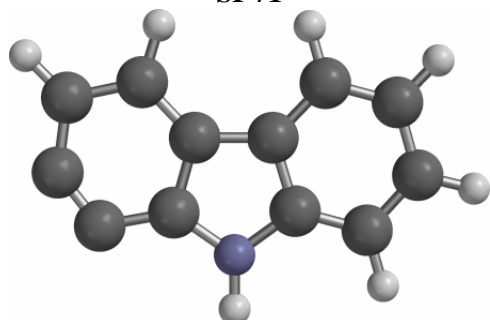

|   |           |           |          |
|---|-----------|-----------|----------|
| H | -1.557930 | -2.466489 | 0.000000 |
| C | -1.840311 | -1.416133 | 0.000000 |
| C | -2.549936 | 1.252796  | 0.000000 |
| C | -0.840250 | -0.423874 | 0.000000 |
| C | -3.211389 | -1.087978 | 0.000000 |
| C | -3.350201 | 0.289971  | 0.000000 |
| C | -1.188817 | 0.969856  | 0.000000 |
| H | -3.996332 | -1.834035 | 0.000000 |
| C | 0.609876  | -0.466759 | 0.000000 |
| C | 1.066677  | 0.880031  | 0.000000 |
| N | -0.035089 | 1.725298  | 0.000000 |
| H | -0.003485 | 2.732813  | 0.000000 |
| H | 1.226659  | -2.540637 | 0.000000 |
| C | 1.552342  | -1.503540 | 0.000000 |
| H | 3.645132  | -1.989347 | 0.000000 |
| C | 2.908410  | -1.191000 | 0.000000 |
| H | 4.402679  | 0.367905  | 0.000000 |
| C | 3.338644  | 0.147665  | 0.000000 |
| H | 2.762297  | 2.233050  | 0.000000 |
| C | 2.426241  | 1.199464  | 0.000000 |

SI-73

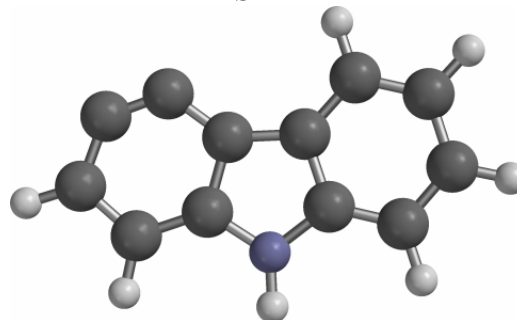

|   |           |           |          |
|---|-----------|-----------|----------|
| C | 1.782008  | -1.558426 | 0.000000 |
| C | 2.607360  | 1.030209  | 0.000000 |
| C | 0.734863  | -0.643399 | 0.000000 |
| C | 2.991240  | -1.247724 | 0.000000 |
| C | 3.580111  | 0.012456  | 0.000000 |
| C | 1.236320  | 0.706718  | 0.000000 |
| H | 4.641684  | 0.234671  | 0.000000 |
| H | 2.924430  | 2.070341  | 0.000000 |
| C | -0.702986 | -0.571544 | 0.000000 |
| C | -1.033081 | 0.811650  | 0.000000 |
| N | 0.137644  | 1.553828  | 0.000000 |
| H | 0.179547  | 2.561023  | 0.000000 |
| H | -1.485911 | -2.585480 | 0.000000 |
| C | -1.728541 | -1.526373 | 0.000000 |
| H | -3.855444 | -1.825314 | 0.000000 |
| C | -3.050347 | -1.096146 | 0.000000 |
| H | -4.400699 | 0.589831  | 0.000000 |
| C | -3.359917 | 0.277364  | 0.000000 |
| H | -2.607924 | 2.305496  | 0.000000 |
| C | -2.361348 | 1.246959  | 0.000000 |

SI-74

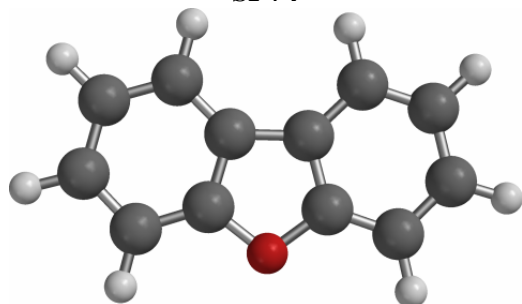

|   |           |          |           |
|---|-----------|----------|-----------|
| H | -1.469879 | 0.000000 | 2.570018  |
| C | -1.726383 | 0.000000 | 1.514170  |
| C | -2.419614 | 0.000000 | -1.249272 |
| C | -0.726178 | 0.000000 | 0.535458  |
| C | -3.059550 | 0.000000 | 1.107228  |
| C | -3.400461 | 0.000000 | -0.255695 |
| C | -1.099272 | 0.000000 | -0.822026 |
| H | -3.848369 | 0.000000 | 1.854115  |
| H | -4.447596 | 0.000000 | -0.545218 |
| H | -2.668604 | 0.000000 | -2.305273 |
| C | 0.726178  | 0.000000 | 0.535458  |
| C | 3.400461  | 0.000000 | -0.255695 |
| C | 1.726383  | 0.000000 | 1.514170  |
| C | 1.099272  | 0.000000 | -0.822026 |
| C | 2.419614  | 0.000000 | -1.249272 |
| C | 3.059550  | 0.000000 | 1.107228  |
| H | 1.469879  | 0.000000 | 2.570018  |
| H | 2.668604  | 0.000000 | -2.305273 |
| H | 3.848369  | 0.000000 | 1.854115  |
| H | 4.447596  | 0.000000 | -0.545218 |
| O | 0.000000  | 0.000000 | -1.651381 |

SI-76

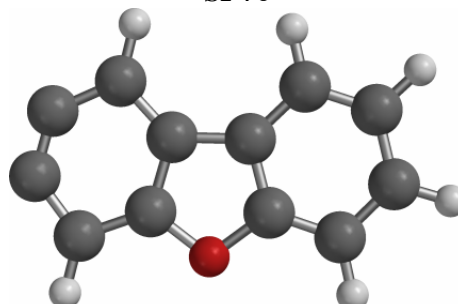

|   |           |           |          |
|---|-----------|-----------|----------|
| H | -1.528968 | -2.672800 | 0.000000 |
| C | -1.789690 | -1.619693 | 0.000000 |
| C | -2.561397 | 1.247240  | 0.000000 |
| C | -0.831310 | -0.580222 | 0.000000 |
| C | -3.056896 | -1.067424 | 0.000000 |
| C | -3.391590 | 0.139586  | 0.000000 |
| C | -1.231263 | 0.791624  | 0.000000 |
| H | -2.829515 | 2.297744  | 0.000000 |
| C | 0.621216  | -0.547971 | 0.000000 |
| C | 3.282950  | 0.287152  | 0.000000 |
| C | 1.637923  | -1.510088 | 0.000000 |
| C | 0.973045  | 0.814677  | 0.000000 |
| C | 2.285863  | 1.264148  | 0.000000 |
| C | 2.963803  | -1.081163 | 0.000000 |
| H | 1.399929  | -2.570159 | 0.000000 |
| H | 2.516115  | 2.324346  | 0.000000 |
| H | 3.764358  | -1.815339 | 0.000000 |
| H | 4.325156  | 0.593586  | 0.000000 |
| O | -0.139349 | 1.627492  | 0.000000 |

SI-75

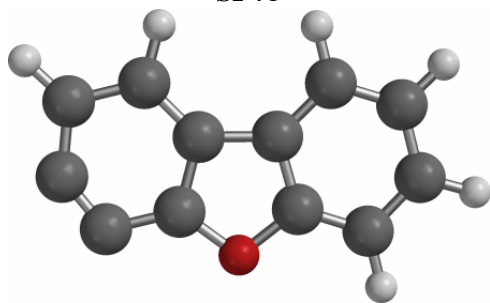

|   |           |           |          |
|---|-----------|-----------|----------|
| H | -1.619628 | -2.468636 | 0.000000 |
| C | -1.863522 | -1.409227 | 0.000000 |
| C | -2.482899 | 1.296251  | 0.000000 |
| C | -0.836766 | -0.446060 | 0.000000 |
| C | -3.222280 | -1.026745 | 0.000000 |
| C | -3.307626 | 0.351527  | 0.000000 |
| C | -1.147035 | 0.944254  | 0.000000 |
| H | -4.035031 | -1.742367 | 0.000000 |
| C | 0.614850  | -0.497341 | 0.000000 |
| C | 3.319637  | 0.193470  | 0.000000 |
| C | 1.579545  | -1.512130 | 0.000000 |
| C | 1.041528  | 0.845664  | 0.000000 |
| C | 2.377046  | 1.222514  | 0.000000 |
| C | 2.926563  | -1.155391 | 0.000000 |
| H | 1.284173  | -2.557742 | 0.000000 |
| H | 2.664282  | 2.268696  | 0.000000 |
| H | 3.686304  | -1.931795 | 0.000000 |
| H | 4.376916  | 0.442846  | 0.000000 |
| O | -0.021946 | 1.723688  | 0.000000 |

SI-77

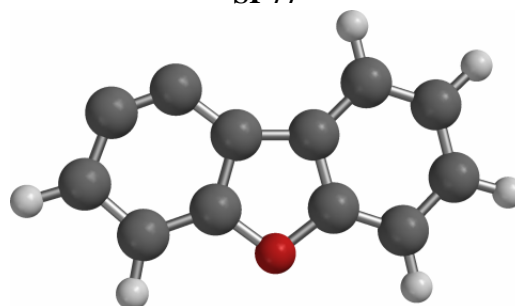

|   |           |           |          |
|---|-----------|-----------|----------|
| C | 1.807598  | -1.568551 | 0.000000 |
| C | 2.551130  | 1.057251  | 0.000000 |
| C | 0.740040  | -0.676906 | 0.000000 |
| C | 3.002185  | -1.202952 | 0.000000 |
| C | 3.557645  | 0.070945  | 0.000000 |
| C | 1.203597  | 0.670472  | 0.000000 |
| H | 4.612269  | 0.322350  | 0.000000 |
| H | 2.811419  | 2.111137  | 0.000000 |
| C | -0.701973 | -0.605442 | 0.000000 |
| C | -3.325323 | 0.331541  | 0.000000 |
| C | -1.753220 | -1.530208 | 0.000000 |
| C | -0.997063 | 0.772779  | 0.000000 |
| C | -2.293134 | 1.270524  | 0.000000 |
| C | -3.059936 | -1.049408 | 0.000000 |
| H | -1.548767 | -2.596828 | 0.000000 |
| H | -2.483794 | 2.338548  | 0.000000 |
| H | -3.889415 | -1.750694 | 0.000000 |
| H | -4.355235 | 0.677063  | 0.000000 |
| O | 0.142717  | 1.546761  | 0.000000 |

SI-78

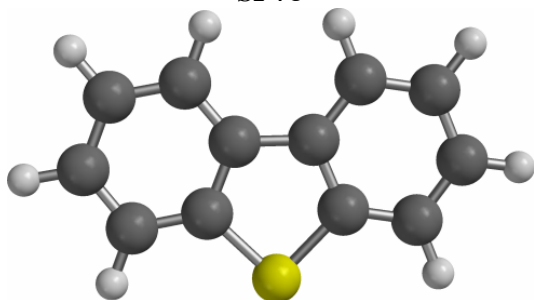

|   |           |          |           |
|---|-----------|----------|-----------|
| H | -1.226895 | 0.000000 | 2.670699  |
| C | -1.613205 | 0.000000 | 1.654878  |
| C | -2.637744 | 0.000000 | -0.973243 |
| C | -0.727675 | 0.000000 | 0.566358  |
| C | -2.985508 | 0.000000 | 1.430923  |
| C | -3.495678 | 0.000000 | 0.123581  |
| C | -1.260639 | 0.000000 | -0.742513 |
| H | -3.668824 | 0.000000 | 2.275472  |
| H | -4.570227 | 0.000000 | -0.037067 |
| H | -3.031679 | 0.000000 | -1.985564 |
| C | 0.727675  | 0.000000 | 0.566358  |
| C | 3.495678  | 0.000000 | 0.123581  |
| C | 1.613205  | 0.000000 | 1.654878  |
| C | 1.260639  | 0.000000 | -0.742513 |
| C | 2.637744  | 0.000000 | -0.973243 |
| C | 2.985508  | 0.000000 | 1.430923  |
| H | 1.226895  | 0.000000 | 2.670699  |
| H | 3.031679  | 0.000000 | -1.985564 |
| H | 3.668824  | 0.000000 | 2.275472  |
| H | 4.570227  | 0.000000 | -0.037067 |
| S | 0.000000  | 0.000000 | -1.982579 |

SI-80

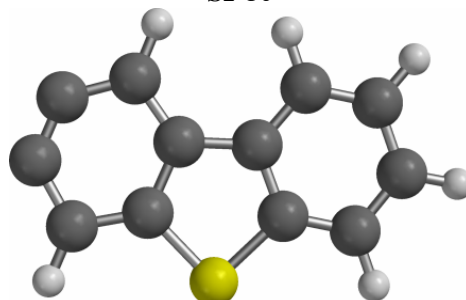

|   |           |           |          |
|---|-----------|-----------|----------|
| H | -1.214968 | -2.797946 | 0.000000 |
| C | -1.627211 | -1.794139 | 0.000000 |
| C | -2.782503 | 0.914266  | 0.000000 |
| C | -0.807902 | -0.633179 | 0.000000 |
| C | -2.959218 | -1.442144 | 0.000000 |
| C | -3.454001 | -0.291011 | 0.000000 |
| C | -1.389083 | 0.673838  | 0.000000 |
| H | -3.209600 | 1.911812  | 0.000000 |
| C | 0.648425  | -0.577914 | 0.000000 |
| C | 3.401613  | -0.046923 | 0.000000 |
| C | 1.569032  | -1.637680 | 0.000000 |
| C | 1.140315  | 0.745623  | 0.000000 |
| C | 2.508825  | 1.021479  | 0.000000 |
| C | 2.933307  | -1.369814 | 0.000000 |
| H | 1.217051  | -2.665795 | 0.000000 |
| H | 2.869199  | 2.046274  | 0.000000 |
| H | 3.642969  | -2.192214 | 0.000000 |
| H | 4.470353  | 0.148223  | 0.000000 |
| S | -0.157962 | 1.947166  | 0.000000 |

SI-79

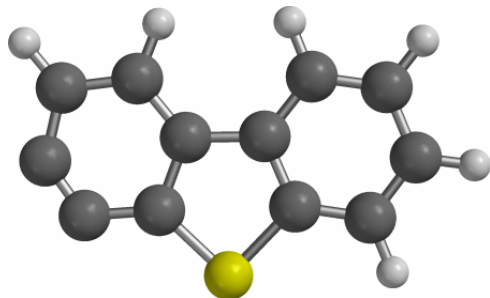

|   |           |           |          |
|---|-----------|-----------|----------|
| H | -1.357650 | -2.601631 | 0.000000 |
| C | -1.741409 | -1.584285 | 0.000000 |
| C | -2.687375 | 0.963880  | 0.000000 |
| C | -0.832974 | -0.501741 | 0.000000 |
| C | -3.136691 | -1.397331 | 0.000000 |
| C | -3.427129 | -0.043380 | 0.000000 |
| C | -1.308636 | 0.849324  | 0.000000 |
| H | -3.838443 | -2.223007 | 0.000000 |
| C | 0.622496  | -0.539796 | 0.000000 |
| C | 3.405453  | -0.179173 | 0.000000 |
| C | 1.478083  | -1.653516 | 0.000000 |
| C | 1.196317  | 0.753335  | 0.000000 |
| C | 2.580348  | 0.941713  | 0.000000 |
| C | 2.855798  | -1.470575 | 0.000000 |
| H | 1.063072  | -2.657769 | 0.000000 |
| H | 3.003397  | 1.942184  | 0.000000 |
| H | 3.513070  | -2.335495 | 0.000000 |
| H | 4.484189  | -0.050655 | 0.000000 |
| S | -0.015171 | 2.043391  | 0.000000 |

SI-81

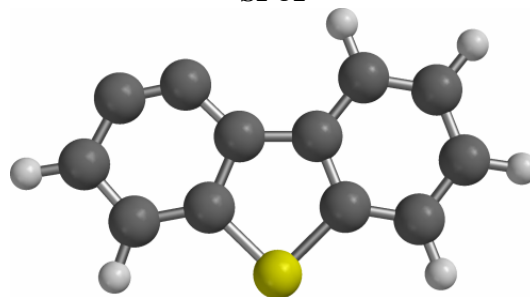

|   |           |           |          |
|---|-----------|-----------|----------|
| H | 3.148661  | -1.792929 | 0.000000 |
| C | 2.737324  | -0.786708 | 0.000000 |
| C | 1.670496  | 1.694962  | 0.000000 |
| C | 1.341626  | -0.602029 | 0.000000 |
| C | 3.617089  | 0.313670  | 0.000000 |
| C | 2.904453  | 1.504900  | 0.000000 |
| C | 0.712814  | 0.684565  | 0.000000 |
| H | 4.694582  | 0.193006  | 0.000000 |
| C | -0.729483 | 0.615627  | 0.000000 |
| C | -3.461715 | 0.035609  | 0.000000 |
| C | -1.187752 | -0.720822 | 0.000000 |
| C | -1.662719 | 1.663470  | 0.000000 |
| C | -3.020456 | 1.369466  | 0.000000 |
| C | -2.552387 | -1.018854 | 0.000000 |
| H | -1.312584 | 2.692203  | 0.000000 |
| H | -3.747817 | 2.176234  | 0.000000 |
| H | -2.897880 | -2.048700 | 0.000000 |
| H | -4.526801 | -0.179026 | 0.000000 |
| S | 0.135115  | -1.896938 | 0.000000 |



SI-82

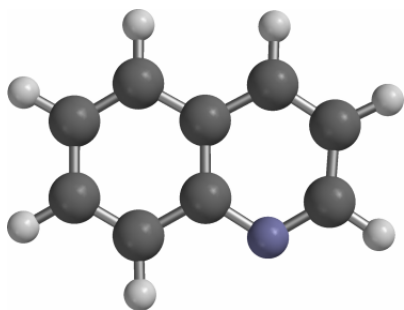

|   |           |           |          |
|---|-----------|-----------|----------|
| H | 3.397968  | -1.132760 | 0.000000 |
| C | 2.421728  | -0.657021 | 0.000000 |
| H | 1.289647  | -2.484344 | 0.000000 |
| C | 1.263204  | -1.396797 | 0.000000 |
| N | 1.189343  | 1.425076  | 0.000000 |
| C | 0.012125  | -0.729011 | 0.000000 |
| C | 2.325518  | 0.757952  | 0.000000 |
| C | 0.029192  | 0.703234  | 0.000000 |
| C | -1.235014 | -1.407397 | 0.000000 |
| H | 3.236056  | 1.357068  | 0.000000 |
| H | -1.167263 | 2.490006  | 0.000000 |
| C | -2.415297 | -0.698458 | 0.000000 |
| H | -1.242434 | -2.495141 | 0.000000 |
| H | -3.366133 | -1.224392 | 0.000000 |
| C | -2.399171 | 0.718935  | 0.000000 |
| H | -3.339302 | 1.263974  | 0.000000 |
| C | -1.205510 | 1.405089  | 0.000000 |

SI-84\*

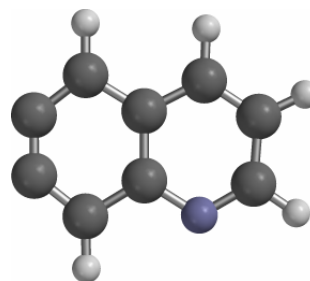

|   |           |           |          |
|---|-----------|-----------|----------|
| H | 3.273607  | -1.130427 | 0.000000 |
| C | 2.298311  | -0.653102 | 0.000000 |
| H | 1.172187  | -2.481141 | 0.000000 |
| C | 1.140894  | -1.394033 | 0.000000 |
| N | 1.064605  | 1.424177  | 0.000000 |
| C | -0.118224 | -0.738278 | 0.000000 |
| C | 2.202828  | 0.760261  | 0.000000 |
| C | -0.097861 | 0.712555  | 0.000000 |
| C | -1.353649 | -1.472098 | 0.000000 |
| H | 3.111151  | 1.362296  | 0.000000 |
| H | -1.292357 | 2.555496  | 0.000000 |
| C | -2.423259 | -0.622197 | 0.000000 |
| H | -1.370354 | -2.558288 | 0.000000 |
| C | -2.402059 | 0.637523  | 0.000000 |
| C | -1.324895 | 1.472043  | 0.000000 |

SI-85\*

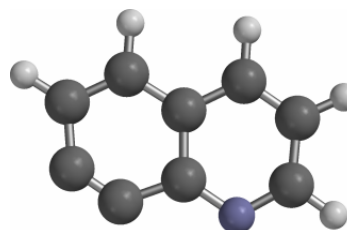

|   |           |           |          |
|---|-----------|-----------|----------|
| C | 0.055910  | -0.829680 | 0.000000 |
| C | -0.112972 | 0.620670  | 0.000000 |
| C | -1.410008 | 1.228747  | 0.000000 |
| H | -1.463581 | 2.315583  | 0.000000 |
| C | -2.588578 | 0.492763  | 0.000000 |
| H | -3.569143 | 0.956477  | 0.000000 |
| C | -2.314304 | -0.883432 | 0.000000 |
| C | -1.209675 | -1.449707 | 0.000000 |
| N | 1.257633  | -1.441671 | 0.000000 |
| C | 2.333307  | -0.672745 | 0.000000 |
| H | 3.291819  | -1.190380 | 0.000000 |
| C | 2.301847  | 0.740025  | 0.000000 |
| H | 3.231527  | 1.300861  | 0.000000 |
| C | 1.082229  | 1.381434  | 0.000000 |
| H | 1.026118  | 2.467479  | 0.000000 |

SI-83\*

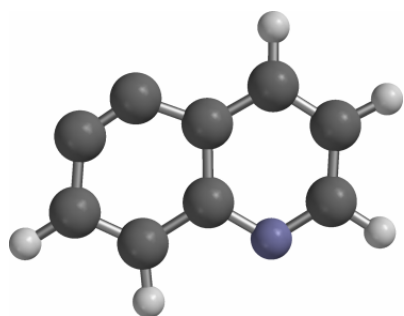

|   |           |           |          |
|---|-----------|-----------|----------|
| H | 3.417249  | -0.961824 | 0.000000 |
| C | 2.403627  | -0.572153 | 0.000000 |
| H | 1.430072  | -2.496043 | 0.000000 |
| C | 1.314497  | -1.416405 | 0.000000 |
| N | 0.998660  | 1.399473  | 0.000000 |
| C | 0.022956  | -0.850361 | 0.000000 |
| C | 2.188102  | 0.826205  | 0.000000 |
| C | -0.103528 | 0.601221  | 0.000000 |
| C | -1.248049 | -1.449976 | 0.000000 |
| H | 3.043932  | 1.500474  | 0.000000 |
| H | -1.400907 | 2.319381  | 0.000000 |
| C | -2.340455 | -0.860831 | 0.000000 |
| C | -2.586128 | 0.523333  | 0.000000 |
| H | -3.558922 | 1.003239  | 0.000000 |
| C | -1.394818 | 1.233572  | 0.000000 |

SI-86

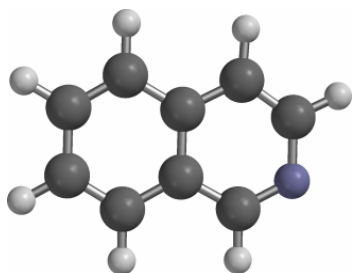

|   |           |           |          |
|---|-----------|-----------|----------|
| H | 3.401837  | -1.081834 | 0.000000 |
| C | 2.421846  | -0.609449 | 0.000000 |
| H | 1.335556  | -2.457244 | 0.000000 |
| C | 1.276440  | -1.371833 | 0.000000 |
| C | 1.263171  | 1.362652  | 0.000000 |
| C | 0.011285  | -0.729664 | 0.000000 |
| N | 2.430161  | 0.752978  | 0.000000 |
| C | 0.004925  | 0.698560  | 0.000000 |
| C | -1.229482 | -1.421080 | 0.000000 |
| H | -1.226258 | 2.481035  | 0.000000 |
| H | 1.281951  | 2.453830  | 0.000000 |
| C | -2.415324 | -0.721022 | 0.000000 |
| H | -1.228436 | -2.508320 | 0.000000 |
| H | -3.360750 | -1.256924 | 0.000000 |
| C | -2.419481 | 0.696898  | 0.000000 |
| H | -3.366202 | 1.229866  | 0.000000 |
| C | -1.231929 | 1.393511  | 0.000000 |

SI-88

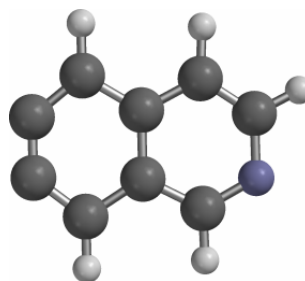

|   |           |           |          |
|---|-----------|-----------|----------|
| H | 3.277555  | -1.078799 | 0.000000 |
| C | 2.298317  | -0.605472 | 0.000000 |
| H | 1.217425  | -2.453808 | 0.000000 |
| C | 1.154243  | -1.369028 | 0.000000 |
| C | 1.139407  | 1.366411  | 0.000000 |
| C | -0.116526 | -0.735179 | 0.000000 |
| N | 2.304568  | 0.755110  | 0.000000 |
| C | -0.123853 | 0.706896  | 0.000000 |
| C | -1.348095 | -1.485332 | 0.000000 |
| H | -1.355378 | 2.542461  | 0.000000 |
| H | 1.158811  | 2.456980  | 0.000000 |
| C | -2.423556 | -0.646194 | 0.000000 |
| H | -1.348932 | -2.570917 | 0.000000 |
| C | -2.425388 | 0.614874  | 0.000000 |
| C | -1.353123 | 1.456569  | 0.000000 |

SI-87

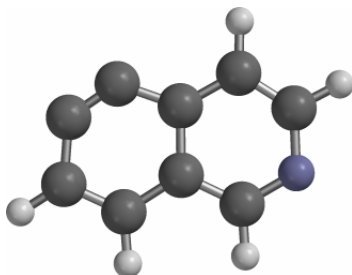

|   |           |           |          |
|---|-----------|-----------|----------|
| H | 3.418129  | -0.899305 | 0.000000 |
| C | 2.400143  | -0.515560 | 0.000000 |
| H | 1.479029  | -2.459477 | 0.000000 |
| C | 1.328803  | -1.384884 | 0.000000 |
| C | 1.073706  | 1.354517  | 0.000000 |
| C | 0.026003  | -0.847164 | 0.000000 |
| N | 2.287943  | 0.838184  | 0.000000 |
| C | -0.129129 | 0.596922  | 0.000000 |
| C | -1.238554 | -1.463739 | 0.000000 |
| H | -1.465314 | 2.303191  | 0.000000 |
| H | 1.011767  | 2.443502  | 0.000000 |
| C | -2.337942 | -0.887740 | 0.000000 |
| C | -2.605061 | 0.490114  | 0.000000 |
| H | -3.582128 | 0.960483  | 0.000000 |
| C | -1.419465 | 1.216205  | 0.000000 |

SI-89

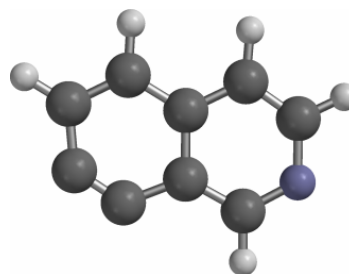

|   |           |           |          |
|---|-----------|-----------|----------|
| H | 3.234784  | -1.254043 | 0.000000 |
| C | 2.300314  | -0.697139 | 0.000000 |
| H | 1.072528  | -2.452058 | 0.000000 |
| C | 1.094174  | -1.365462 | 0.000000 |
| C | 1.322047  | 1.375600  | 0.000000 |
| C | -0.116936 | -0.628660 | 0.000000 |
| N | 2.428309  | 0.655064  | 0.000000 |
| C | 0.023887  | 0.815896  | 0.000000 |
| C | -1.410314 | -1.246693 | 0.000000 |
| H | 1.434090  | 2.458868  | 0.000000 |
| C | -2.594889 | -0.518075 | 0.000000 |
| H | -1.459113 | -2.333282 | 0.000000 |
| H | -3.571257 | -0.990818 | 0.000000 |
| C | -2.334830 | 0.860290  | 0.000000 |
| C | -1.237819 | 1.439887  | 0.000000 |

SI-90

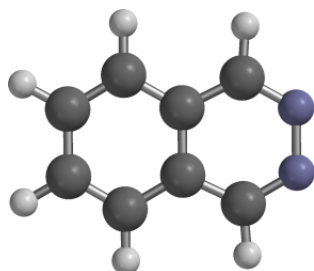

|   |           |          |           |
|---|-----------|----------|-----------|
| N | 0.684733  | 0.000000 | 2.437193  |
| H | 2.415792  | 0.000000 | 1.368043  |
| C | 1.328591  | 0.000000 | 1.292434  |
| C | -1.328591 | 0.000000 | 1.292434  |
| C | 0.708706  | 0.000000 | 0.010185  |
| N | -0.684733 | 0.000000 | 2.437193  |
| C | -0.708706 | 0.000000 | 0.010185  |
| C | 1.411033  | 0.000000 | -1.218437 |
| H | -2.498073 | 0.000000 | -1.213840 |
| H | -2.415792 | 0.000000 | 1.368043  |
| C | 0.708236  | 0.000000 | -2.405560 |
| H | 2.498073  | 0.000000 | -1.213840 |
| H | 1.241026  | 0.000000 | -3.352364 |
| C | -0.708236 | 0.000000 | -2.405560 |
| H | -1.241026 | 0.000000 | -3.352364 |
| C | -1.411033 | 0.000000 | -1.218437 |

SI-92

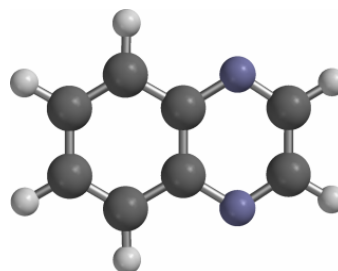

|   |           |          |           |
|---|-----------|----------|-----------|
| H | -1.255283 | 0.000000 | 3.262032  |
| C | -0.710773 | 0.000000 | 2.318524  |
| N | -1.421038 | 0.000000 | 1.210595  |
| N | 1.421038  | 0.000000 | 1.210595  |
| C | -0.715519 | 0.000000 | 0.041912  |
| C | 0.710773  | 0.000000 | 2.318524  |
| C | 0.715519  | 0.000000 | 0.041912  |
| C | -1.411356 | 0.000000 | -1.194109 |
| H | 1.255283  | 0.000000 | 3.262032  |
| H | 2.496704  | 0.000000 | -1.166927 |
| C | -0.709419 | 0.000000 | -2.378726 |
| H | -2.496704 | 0.000000 | -1.166927 |
| H | -1.242586 | 0.000000 | -3.325439 |
| C | 0.709419  | 0.000000 | -2.378726 |
| H | 1.242586  | 0.000000 | -3.325439 |
| C | 1.411356  | 0.000000 | -1.194109 |

SI-91

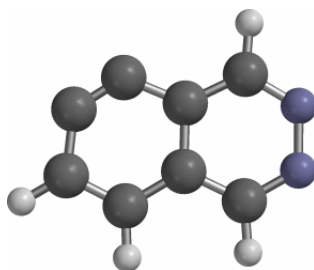

|   |           |           |          |
|---|-----------|-----------|----------|
| N | 2.428991  | 0.572514  | 0.000000 |
| H | 1.524818  | 2.403585  | 0.000000 |
| C | 1.351013  | 1.329811  | 0.000000 |
| C | 1.104919  | -1.331009 | 0.000000 |
| C | 0.029588  | 0.821632  | 0.000000 |
| N | 2.302373  | -0.784230 | 0.000000 |
| C | -0.121971 | -0.608910 | 0.000000 |
| C | -1.221220 | 1.461669  | 0.000000 |
| H | -1.457889 | -2.317812 | 0.000000 |
| H | 1.094269  | -2.420321 | 0.000000 |
| C | -2.317972 | 0.878146  | 0.000000 |
| C | -2.589973 | -0.495059 | 0.000000 |
| H | -3.569039 | -0.961497 | 0.000000 |
| C | -1.406420 | -1.231502 | 0.000000 |

SI-93

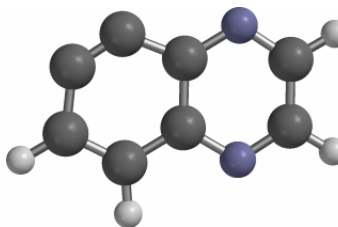

|   |           |           |          |
|---|-----------|-----------|----------|
| H | 3.307889  | -1.083631 | 0.000000 |
| C | 2.320531  | -0.624601 | 0.000000 |
| N | 1.278136  | -1.435032 | 0.000000 |
| N | 1.021570  | 1.395554  | 0.000000 |
| C | 0.066086  | -0.843944 | 0.000000 |
| C | 2.191603  | 0.786220  | 0.000000 |
| C | -0.085749 | 0.607475  | 0.000000 |
| C | -1.197806 | -1.462999 | 0.000000 |
| H | 3.080149  | 1.415510  | 0.000000 |
| H | -1.394995 | 2.318250  | 0.000000 |
| C | -2.291653 | -0.875246 | 0.000000 |
| C | -2.557850 | 0.504885  | 0.000000 |
| H | -3.537787 | 0.969700  | 0.000000 |
| C | -1.378059 | 1.232518  | 0.000000 |

SI-94

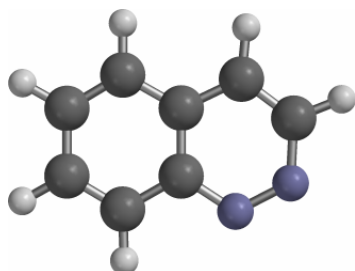

|   |           |           |          |
|---|-----------|-----------|----------|
| H | 3.408599  | -0.952523 | 0.000000 |
| C | 2.400512  | -0.548089 | 0.000000 |
| H | 1.388440  | -2.446626 | 0.000000 |
| C | 1.292219  | -1.363623 | 0.000000 |
| N | 1.183361  | 1.415075  | 0.000000 |
| C | 0.024125  | -0.748159 | 0.000000 |
| N | 2.342322  | 0.814153  | 0.000000 |
| C | 0.030287  | 0.679226  | 0.000000 |
| C | -1.218420 | -1.436745 | 0.000000 |
| H | -1.162482 | 2.471520  | 0.000000 |
| C | -2.396461 | -0.726522 | 0.000000 |
| H | -1.222203 | -2.524015 | 0.000000 |
| H | -3.346523 | -1.253795 | 0.000000 |
| C | -2.389590 | 0.694691  | 0.000000 |
| H | -3.334133 | 1.231295  | 0.000000 |
| C | -1.202109 | 1.386830  | 0.000000 |

SI-96

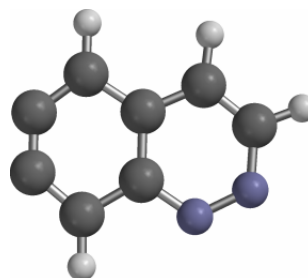

|   |           |           |          |
|---|-----------|-----------|----------|
| H | 3.285121  | -0.943776 | 0.000000 |
| C | 2.277642  | -0.538150 | 0.000000 |
| H | 1.274360  | -2.438638 | 0.000000 |
| C | 1.170842  | -1.356664 | 0.000000 |
| N | 1.058515  | 1.420212  | 0.000000 |
| C | -0.104557 | -0.754936 | 0.000000 |
| N | 2.218649  | 0.821097  | 0.000000 |
| C | -0.096810 | 0.689897  | 0.000000 |
| C | -1.335268 | -1.502452 | 0.000000 |
| H | -1.295127 | 2.535149  | 0.000000 |
| C | -2.403834 | -0.654389 | 0.000000 |
| H | -1.344068 | -2.588241 | 0.000000 |
| C | -2.389711 | 0.607394  | 0.000000 |
| C | -1.324087 | 1.451646  | 0.000000 |

SI-95

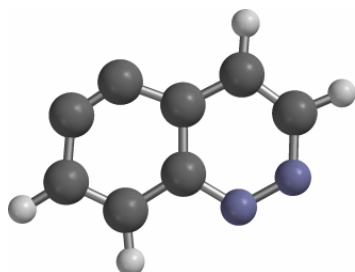

|   |           |           |          |
|---|-----------|-----------|----------|
| H | 3.416761  | -0.805337 | 0.000000 |
| C | 2.381642  | -0.476186 | 0.000000 |
| H | 1.514636  | -2.451921 | 0.000000 |
| C | 1.338912  | -1.380938 | 0.000000 |
| N | 1.022967  | 1.392172  | 0.000000 |
| C | 0.039957  | -0.855469 | 0.000000 |
| N | 2.223219  | 0.873609  | 0.000000 |
| C | -0.080222 | 0.591533  | 0.000000 |
| C | -1.233589 | -1.450314 | 0.000000 |
| H | -1.357451 | 2.327811  | 0.000000 |
| C | -2.318817 | -0.848537 | 0.000000 |
| C | -2.556167 | 0.539704  | 0.000000 |
| H | -3.525908 | 1.024959  | 0.000000 |
| C | -1.362401 | 1.242210  | 0.000000 |

SI-97

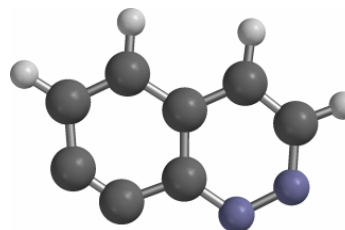

|   |           |           |          |
|---|-----------|-----------|----------|
| H | 3.258220  | -1.146578 | 0.000000 |
| C | 2.294345  | -0.645952 | 0.000000 |
| H | 1.120221  | -2.447307 | 0.000000 |
| C | 1.112918  | -1.360253 | 0.000000 |
| N | 1.268252  | 1.424279  | 0.000000 |
| C | -0.097158 | -0.642064 | 0.000000 |
| N | 2.368116  | 0.709396  | 0.000000 |
| C | 0.067644  | 0.803406  | 0.000000 |
| C | -1.393745 | -1.254167 | 0.000000 |
| C | -2.567033 | -0.512434 | 0.000000 |
| H | -1.448770 | -2.340464 | 0.000000 |
| H | -3.549118 | -0.973019 | 0.000000 |
| C | -2.292350 | 0.865855  | 0.000000 |
| C | -1.191948 | 1.436991  | 0.000000 |

SI-98

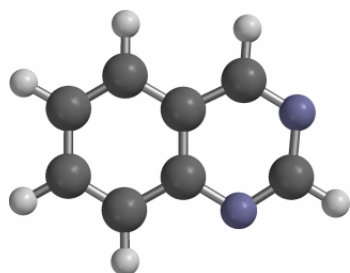

|   |           |           |          |
|---|-----------|-----------|----------|
| N | 2.419423  | 0.703643  | 0.000000 |
| H | 1.329072  | 2.448766  | 0.000000 |
| C | 1.276642  | 1.358493  | 0.000000 |
| N | 1.232388  | -1.388762 | 0.000000 |
| C | 0.013134  | 0.714328  | 0.000000 |
| C | 2.324563  | -0.656766 | 0.000000 |
| C | 0.046140  | -0.711585 | 0.000000 |
| C | -1.230616 | 1.394610  | 0.000000 |
| H | 3.273771  | -1.189211 | 0.000000 |
| H | -1.134442 | -2.513585 | 0.000000 |
| C | -2.403720 | 0.674163  | 0.000000 |
| H | -1.242368 | 2.482108  | 0.000000 |
| H | -3.360644 | 1.188236  | 0.000000 |
| C | -2.372885 | -0.744430 | 0.000000 |
| H | -3.310067 | -1.294576 | 0.000000 |
| C | -1.177286 | -1.429091 | 0.000000 |

SI-100

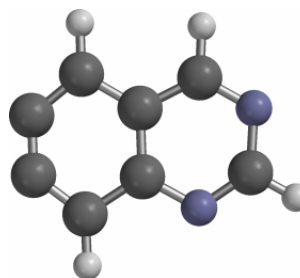

|   |           |           |          |
|---|-----------|-----------|----------|
| N | 2.292893  | 0.702878  | 0.000000 |
| H | 1.206827  | 2.449212  | 0.000000 |
| C | 1.151719  | 1.359659  | 0.000000 |
| N | 1.108530  | -1.385410 | 0.000000 |
| C | -0.118077 | 0.723609  | 0.000000 |
| C | 2.202615  | -0.654685 | 0.000000 |
| C | -0.079925 | -0.720401 | 0.000000 |
| C | -1.352096 | 1.455721  | 0.000000 |
| H | 3.150651  | -1.188561 | 0.000000 |
| H | -1.254360 | -2.580608 | 0.000000 |
| C | -2.409589 | 0.591516  | 0.000000 |
| H | -1.377981 | 2.541560  | 0.000000 |
| C | -2.377907 | -0.668944 | 0.000000 |
| C | -1.295247 | -1.497587 | 0.000000 |

SI-99

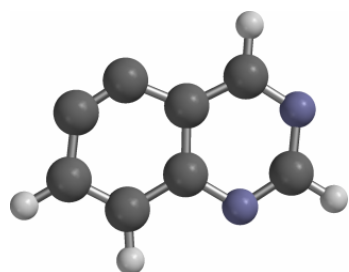

|   |           |           |          |
|---|-----------|-----------|----------|
| N | 2.417448  | 0.598340  | 0.000000 |
| H | 1.490093  | 2.442506  | 0.000000 |
| C | 1.341055  | 1.363459  | 0.000000 |
| N | 1.047481  | -1.380239 | 0.000000 |
| C | 0.035619  | 0.827823  | 0.000000 |
| C | 2.201692  | -0.743338 | 0.000000 |
| C | -0.079018 | -0.616926 | 0.000000 |
| C | -1.229502 | 1.440536  | 0.000000 |
| H | 3.098095  | -1.360100 | 0.000000 |
| H | -1.366851 | -2.346654 | 0.000000 |
| C | -2.312265 | 0.833686  | 0.000000 |
| C | -2.554131 | -0.549768 | 0.000000 |
| H | -3.526063 | -1.031408 | 0.000000 |
| C | -1.362174 | -1.261047 | 0.000000 |

SI-101

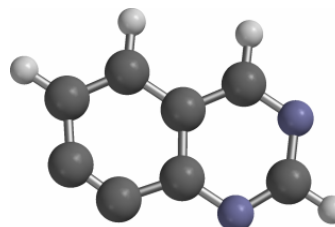

|   |           |           |          |
|---|-----------|-----------|----------|
| N | 2.290669  | 0.794314  | 0.000000 |
| H | 1.058326  | 2.440526  | 0.000000 |
| C | 1.093079  | 1.350215  | 0.000000 |
| N | 1.299844  | -1.396501 | 0.000000 |
| C | -0.112958 | 0.606348  | 0.000000 |
| C | 2.323221  | -0.562729 | 0.000000 |
| C | 0.074261  | -0.834698 | 0.000000 |
| C | -1.408460 | 1.210654  | 0.000000 |
| H | 3.315732  | -1.008292 | 0.000000 |
| C | -2.578685 | 0.460378  | 0.000000 |
| H | -1.470895 | 2.296829  | 0.000000 |
| H | -3.565127 | 0.910657  | 0.000000 |
| C | -2.284570 | -0.911392 | 0.000000 |
| C | -1.178931 | -1.477238 | 0.000000 |

SI-102

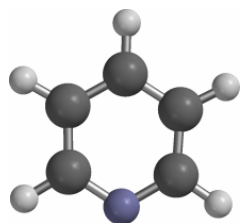

|   |           |          |           |
|---|-----------|----------|-----------|
| H | 2.157893  | 0.000000 | -1.180546 |
| C | 1.198748  | 0.000000 | -0.670841 |
| C | -1.142285 | 0.000000 | 0.724114  |
| C | 1.142285  | 0.000000 | 0.724114  |
| C | 0.000000  | 0.000000 | -1.383231 |
| C | -1.198748 | 0.000000 | -0.670841 |
| N | 0.000000  | 0.000000 | 1.422944  |
| H | 2.059750  | 0.000000 | 1.311063  |
| H | 0.000000  | 0.000000 | -2.470159 |
| H | -2.157893 | 0.000000 | -1.180546 |
| H | -2.059750 | 0.000000 | 1.311063  |

SI-105

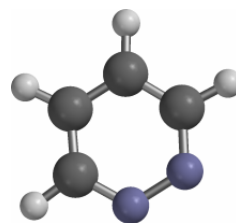

|   |           |          |           |
|---|-----------|----------|-----------|
| H | 1.272030  | 0.000000 | 2.095067  |
| C | 0.692022  | 0.000000 | 1.176795  |
| N | -0.668236 | 0.000000 | -1.236408 |
| C | 1.323035  | 0.000000 | -0.071790 |
| C | -0.692022 | 0.000000 | 1.176795  |
| C | -1.323035 | 0.000000 | -0.071790 |
| N | 0.668236  | 0.000000 | -1.236408 |
| H | 2.407245  | 0.000000 | -0.156040 |
| H | -1.272030 | 0.000000 | 2.095067  |
| H | -2.407245 | 0.000000 | -0.156040 |

SI-103\*

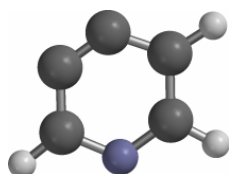

|   |           |           |           |
|---|-----------|-----------|-----------|
| C | 0.676457  | -1.197022 | 0.000000  |
| C | -0.662355 | 1.034551  | -0.000000 |
| C | 1.414698  | -0.020590 | 0.000000  |
| C | -0.580771 | -1.253776 | 0.000000  |
| C | -1.426420 | -0.165545 | -0.000000 |
| N | 0.667732  | 1.100300  | 0.000000  |
| H | 2.494944  | 0.077167  | 0.000000  |
| H | -2.511276 | -0.152871 | -0.000000 |
| H | -1.187450 | 1.987886  | -0.000000 |

SI-106\*

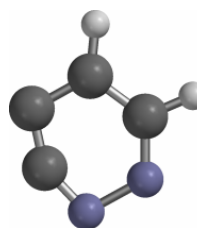

|   |           |           |          |
|---|-----------|-----------|----------|
| C | 0.117577  | -1.478973 | 0.000000 |
| N | -0.299202 | 1.296307  | 0.000000 |
| C | -0.922600 | -0.732774 | 0.000000 |
| C | 1.229094  | -0.631346 | 0.000000 |
| C | 0.915223  | 0.763998  | 0.000000 |
| N | -1.418118 | 0.433400  | 0.000000 |
| H | 2.265535  | -0.965902 | 0.000000 |
| H | 1.709610  | 1.506570  | 0.000000 |

SI-104\*

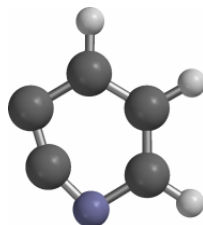

|   |           |           |          |
|---|-----------|-----------|----------|
| C | 0.135156  | -1.533551 | 0.000000 |
| C | -0.345784 | 1.244114  | 0.000000 |
| C | -0.890673 | -0.774999 | 0.000000 |
| C | 1.233202  | -0.626745 | 0.000000 |
| C | 0.966903  | 0.763711  | 0.000000 |
| N | -1.419451 | 0.373928  | 0.000000 |
| H | 2.265024  | -0.978229 | 0.000000 |
| H | 1.785211  | 1.477501  | 0.000000 |
| H | -0.591922 | 2.300797  | 0.000000 |

SI-107

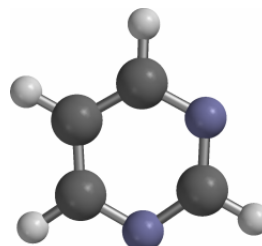

|   |           |          |           |
|---|-----------|----------|-----------|
| N | -1.199190 | 0.000000 | -0.717565 |
| C | 1.184475  | 0.000000 | 0.621298  |
| C | 0.000000  | 0.000000 | -1.310466 |
| C | -1.184475 | 0.000000 | 0.621298  |
| C | 0.000000  | 0.000000 | 1.355217  |
| N | 1.199190  | 0.000000 | -0.717565 |
| H | 0.000000  | 0.000000 | -2.398906 |
| H | -2.154491 | 0.000000 | 1.116389  |
| H | 0.000000  | 0.000000 | 2.440526  |
| H | 2.154491  | 0.000000 | 1.116389  |

**SI-108\***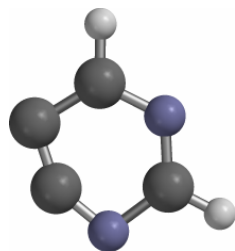

|   |           |           |          |
|---|-----------|-----------|----------|
| N | 1.435253  | -0.140692 | 0.000000 |
| C | -1.284055 | 0.349476  | 0.000000 |
| C | 0.471585  | -1.148780 | 0.000000 |
| C | 0.760700  | 0.927724  | 0.000000 |
| C | -0.399142 | 1.467007  | 0.000000 |
| N | -0.827504 | -0.924569 | 0.000000 |
| H | 0.849694  | -2.164927 | 0.000000 |
| H | -2.365797 | 0.467080  | 0.000000 |

**SI-111\***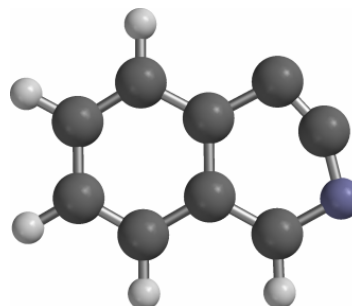

|   |           |           |          |
|---|-----------|-----------|----------|
| C | 2.219409  | 0.648498  | 0.000000 |
| C | 1.327756  | 1.540945  | 0.000000 |
| C | 1.406472  | -1.279447 | 0.000000 |
| C | 0.068078  | 0.825752  | 0.000000 |
| N | 2.568554  | -0.588586 | 0.000000 |
| C | 0.136103  | -0.628110 | 0.000000 |
| C | -1.205972 | 1.446606  | 0.000000 |
| H | -1.024487 | -2.461973 | 0.000000 |
| H | 1.484683  | -2.363538 | 0.000000 |
| C | -2.353972 | 0.682779  | 0.000000 |
| H | -1.249468 | 2.530929  | 0.000000 |
| H | -3.325587 | 1.169880  | 0.000000 |
| C | -2.289680 | -0.732553 | 0.000000 |
| H | -3.209651 | -1.310242 | 0.000000 |
| C | -1.072901 | -1.375653 | 0.000000 |

**SI-109**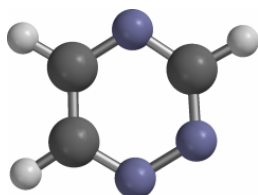

|   |           |           |          |
|---|-----------|-----------|----------|
| N | 0.309867  | -1.351235 | 0.000000 |
| N | -0.972326 | -0.974817 | 0.000000 |
| C | -1.242058 | 0.333445  | 0.000000 |
| H | -2.297332 | 0.594740  | 0.000000 |
| N | -0.359476 | 1.344298  | 0.000000 |
| C | 0.912431  | 0.958465  | 0.000000 |
| H | 1.676803  | 1.733967  | 0.000000 |
| C | 1.245564  | -0.400409 | 0.000000 |
| H | 2.276995  | -0.743015 | 0.000000 |

**SI-112\***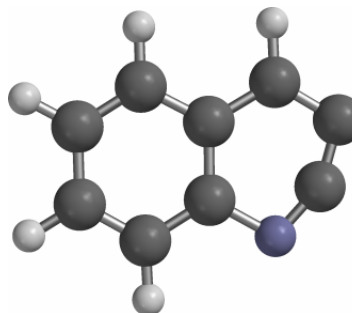

|   |           |           |          |
|---|-----------|-----------|----------|
| C | 2.590094  | 0.696050  | 0.000000 |
| H | 1.357111  | 2.504052  | 0.000000 |
| C | 1.385378  | 1.412744  | 0.000000 |
| N | 1.355722  | -1.439809 | 0.000000 |
| C | 0.131146  | 0.699234  | 0.000000 |
| C | 2.219051  | -0.537614 | 0.000000 |
| C | 0.125626  | -0.741212 | 0.000000 |
| C | -1.123746 | 1.360860  | 0.000000 |
| H | -1.046941 | -2.543485 | 0.000000 |
| C | -2.302089 | 0.644159  | 0.000000 |
| H | -1.140714 | 2.447959  | 0.000000 |
| H | -3.254470 | 1.166586  | 0.000000 |
| C | -2.282441 | -0.769222 | 0.000000 |
| H | -3.219672 | -1.318718 | 0.000000 |
| C | -1.085864 | -1.459104 | 0.000000 |

**SI-110\***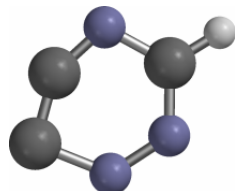

|   |           |           |          |
|---|-----------|-----------|----------|
| N | -0.445087 | -1.139143 | 0.000000 |
| N | -1.308825 | -0.183672 | 0.000000 |
| C | -0.986513 | 1.268868  | 0.000000 |
| C | 0.335869  | 1.132744  | 0.000000 |
| C | 0.866903  | -0.934152 | 0.000000 |
| H | 1.571995  | -1.755687 | 0.000000 |
| N | 1.314896  | 0.362946  | 0.000000 |

SI-113\*

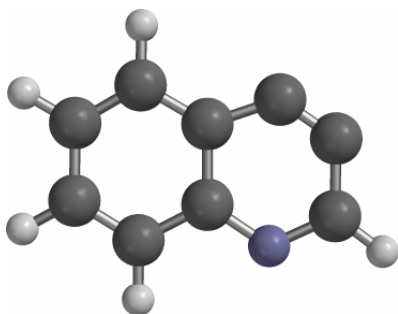

|   |           |           |          |
|---|-----------|-----------|----------|
| C | 2.368529  | 0.844729  | 0.000000 |
| C | 1.272111  | 1.439458  | 0.000000 |
| N | 1.369827  | -1.237788 | 0.000000 |
| C | 0.002986  | 0.850930  | 0.000000 |
| C | 2.506137  | -0.561910 | 0.000000 |
| C | 0.163534  | -0.610496 | 0.000000 |
| C | -1.287564 | 1.420407  | 0.000000 |
| H | 3.442036  | -1.111603 | 0.000000 |
| H | -0.908012 | -2.475342 | 0.000000 |
| C | -2.400429 | 0.604602  | 0.000000 |
| H | -1.385406 | 2.501318  | 0.000000 |
| H | -3.393269 | 1.045552  | 0.000000 |
| C | -2.263332 | -0.802357 | 0.000000 |
| H | -3.154208 | -1.424233 | 0.000000 |
| C | -1.018731 | -1.396068 | 0.000000 |

SI-115\*

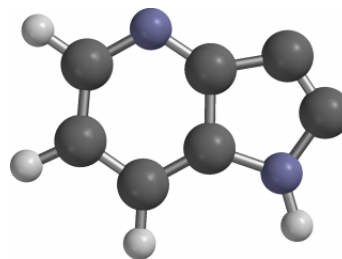

|   |           |           |          |
|---|-----------|-----------|----------|
| C | 0.334735  | -0.637410 | 0.000000 |
| C | -1.994956 | 0.769108  | 0.000000 |
| C | 0.271660  | 0.817973  | 0.000000 |
| C | -0.844965 | -1.366450 | 0.000000 |
| C | -2.034777 | -0.633197 | 0.000000 |
| N | -0.867403 | 1.488266  | 0.000000 |
| H | -0.849428 | -2.453892 | 0.000000 |
| H | -2.992862 | -1.143499 | 0.000000 |
| H | -2.922370 | 1.337676  | 0.000000 |
| N | 1.691303  | -1.019594 | 0.000000 |
| H | 2.032637  | -1.970029 | 0.000000 |
| C | 2.426746  | 0.137697  | 0.000000 |
| C | 1.670483  | 1.139575  | 0.000000 |

SI-116\*

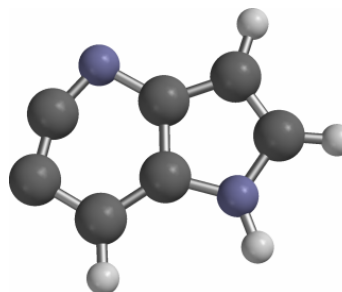

|   |           |           |          |
|---|-----------|-----------|----------|
| N | 1.095429  | -1.475247 | 0.000000 |
| C | -0.105352 | -0.780094 | 0.000000 |
| C | -0.111323 | 0.659624  | 0.000000 |
| H | 1.047538  | 2.514768  | 0.000000 |
| C | 1.079406  | 1.424314  | 0.000000 |
| C | 2.283914  | 0.686258  | 0.000000 |
| C | 1.957563  | -0.550586 | 0.000000 |
| N | -1.440287 | 1.028483  | 0.000000 |
| H | -1.781095 | 1.977379  | 0.000000 |
| C | -2.236263 | -0.097876 | 0.000000 |
| H | -3.313584 | -0.004158 | 0.000000 |
| C | -1.455742 | -1.230076 | 0.000000 |
| H | -1.801501 | -2.253219 | 0.000000 |

SI-114

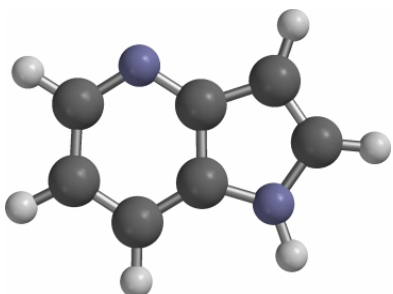

|   |           |           |          |
|---|-----------|-----------|----------|
| C | 0.230276  | -0.696663 | 0.000000 |
| C | -2.054906 | 0.754076  | 0.000000 |
| C | 0.213823  | 0.730457  | 0.000000 |
| C | -0.965082 | -1.413316 | 0.000000 |
| C | -2.130521 | -0.653822 | 0.000000 |
| N | -0.921272 | 1.453814  | 0.000000 |
| H | -0.991476 | -2.500268 | 0.000000 |
| H | -3.102720 | -1.137368 | 0.000000 |
| H | -2.974998 | 1.336866  | 0.000000 |
| C | 1.580445  | 1.168476  | 0.000000 |
| H | 1.927976  | 2.191541  | 0.000000 |
| C | 2.355903  | 0.039413  | 0.000000 |
| H | 3.432095  | -0.065055 | 0.000000 |
| N | 1.550578  | -1.087682 | 0.000000 |
| H | 1.883932  | -2.039099 | 0.000000 |



SI-117\*

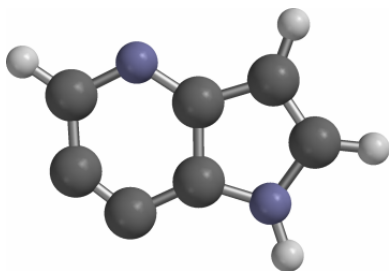

|   |           |           |          |
|---|-----------|-----------|----------|
| N | 1.108932  | -1.263614 | 0.000000 |
| C | -0.081719 | -0.649267 | 0.000000 |
| C | -0.235139 | 0.795272  | 0.000000 |
| C | 0.958404  | 1.492901  | 0.000000 |
| C | 2.028711  | 0.828673  | 0.000000 |
| H | 3.193633  | -1.069493 | 0.000000 |
| C | 2.242311  | -0.550828 | 0.000000 |
| N | -1.579309 | 1.066272  | 0.000000 |
| H | -1.989117 | 1.987282  | 0.000000 |
| C | -2.279855 | -0.128648 | 0.000000 |
| H | -3.360710 | -0.121433 | 0.000000 |
| C | -1.411282 | -1.189111 | 0.000000 |
| H | -1.678195 | -2.235929 | 0.000000 |

SI-119\*

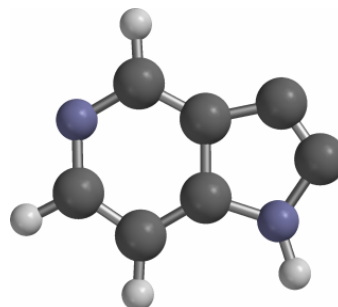

|   |           |           |          |
|---|-----------|-----------|----------|
| C | 0.307605  | -0.811172 | 0.000000 |
| C | -2.021863 | 0.601077  | 0.000000 |
| C | -0.939620 | -1.437209 | 0.000000 |
| C | 0.342758  | 0.636521  | 0.000000 |
| C | -0.848836 | 1.355799  | 0.000000 |
| N | -2.080493 | -0.745097 | 0.000000 |
| H | -1.020428 | -2.522678 | 0.000000 |
| H | -0.879578 | 2.441952  | 0.000000 |
| H | -2.983037 | 1.111210  | 0.000000 |
| N | 1.689597  | 1.037565  | 0.000000 |
| H | 2.019648  | 1.991226  | 0.000000 |
| C | 2.444439  | -0.113987 | 0.000000 |
| C | 1.706425  | -1.121603 | 0.000000 |

SI-118

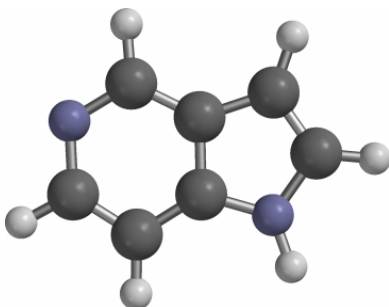

|   |           |           |          |
|---|-----------|-----------|----------|
| C | 0.237122  | -0.739323 | 0.000000 |
| C | -2.126241 | 0.631638  | 0.000000 |
| C | -1.010976 | -1.382750 | 0.000000 |
| C | 0.237607  | 0.681812  | 0.000000 |
| C | -0.964924 | 1.394690  | 0.000000 |
| N | -2.164926 | -0.719978 | 0.000000 |
| H | -1.075091 | -2.470782 | 0.000000 |
| H | -1.003803 | 2.480355  | 0.000000 |
| H | -3.095074 | 1.127398  | 0.000000 |
| C | 1.610533  | -1.163031 | 0.000000 |
| H | 1.980328  | -2.179039 | 0.000000 |
| C | 2.374305  | -0.028196 | 0.000000 |
| H | 3.448993  | 0.089807  | 0.000000 |
| N | 1.550398  | 1.088577  | 0.000000 |
| H | 1.868315  | 2.045407  | 0.000000 |

SI-120\*

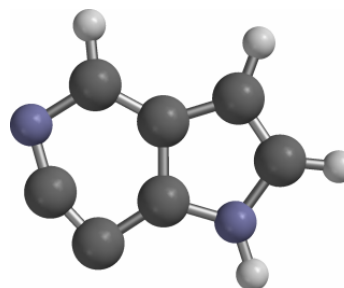

|   |           |           |          |
|---|-----------|-----------|----------|
| N | 2.292795  | 0.527054  | 0.000000 |
| H | 1.309106  | 2.376001  | 0.000000 |
| C | 1.159935  | 1.301315  | 0.000000 |
| C | -0.103849 | 0.687956  | 0.000000 |
| C | -0.168611 | -0.761129 | 0.000000 |
| C | 0.990732  | -1.579676 | 0.000000 |
| C | 1.897331  | -0.679947 | 0.000000 |
| N | -1.499383 | -1.094062 | 0.000000 |
| H | -1.846775 | -2.041348 | 0.000000 |
| C | -2.269545 | 0.058273  | 0.000000 |
| H | -3.348754 | -0.008510 | 0.000000 |
| C | -1.460438 | 1.161770  | 0.000000 |
| H | -1.794613 | 2.190058  | 0.000000 |

SI-121

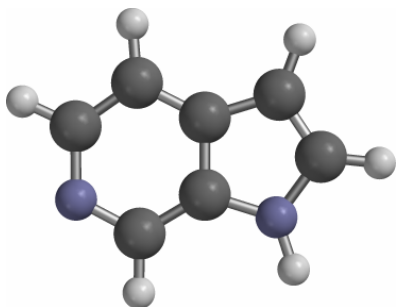

|   |           |           |          |
|---|-----------|-----------|----------|
| C | 0.239074  | -0.660636 | 0.000000 |
| C | -2.151077 | 0.590284  | 0.000000 |
| C | -0.958599 | -1.381362 | 0.000000 |
| C | 0.233750  | 0.760409  | 0.000000 |
| C | -1.019978 | 1.394896  | 0.000000 |
| N | -2.136319 | -0.762910 | 0.000000 |
| H | -0.969844 | -2.471685 | 0.000000 |
| H | -1.110560 | 2.477540  | 0.000000 |
| H | -3.140356 | 1.043559  | 0.000000 |
| C | 1.603630  | 1.184029  | 0.000000 |
| H | 1.974029  | 2.199795  | 0.000000 |
| C | 2.371201  | 0.046624  | 0.000000 |
| H | 3.447066  | -0.063353 | 0.000000 |
| N | 1.558234  | -1.068121 | 0.000000 |
| H | 1.879042  | -2.023816 | 0.000000 |

SI-123\*

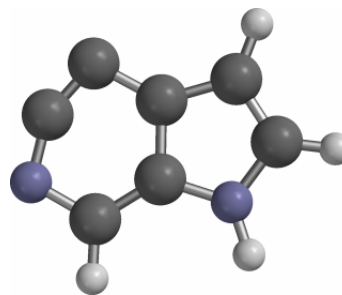

|   |           |           |          |
|---|-----------|-----------|----------|
| C | -1.038406 | -1.566237 | 0.000000 |
| C | -1.109882 | 1.296712  | 0.000000 |
| C | 0.192756  | -0.836651 | 0.000000 |
| C | -1.922542 | -0.654279 | 0.000000 |
| N | -2.272224 | 0.574340  | 0.000000 |
| C | 0.113448  | 0.612593  | 0.000000 |
| C | 1.583013  | -1.170680 | 0.000000 |
| H | 2.008465  | -2.163826 | 0.000000 |
| C | 2.280653  | 0.012360  | 0.000000 |
| H | 3.348595  | 0.184304  | 0.000000 |
| N | 1.410176  | 1.082257  | 0.000000 |
| H | 1.687213  | 2.051610  | 0.000000 |
| H | -1.202753 | 2.378347  | 0.000000 |

SI-124

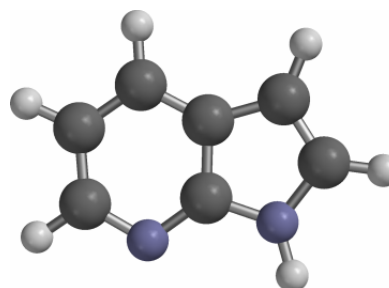

|   |           |           |          |
|---|-----------|-----------|----------|
| C | 0.230554  | -0.778267 | 0.000000 |
| C | -2.026743 | 0.788279  | 0.000000 |
| C | 0.210803  | 0.647319  | 0.000000 |
| C | -1.016858 | -1.416536 | 0.000000 |
| C | -2.153682 | -0.613794 | 0.000000 |
| N | -0.859326 | 1.440051  | 0.000000 |
| H | -1.096418 | -2.500813 | 0.000000 |
| H | -3.144799 | -1.057330 | 0.000000 |
| H | -2.918579 | 1.412297  | 0.000000 |
| C | 1.609221  | -1.175558 | 0.000000 |
| H | 2.000646  | -2.183693 | 0.000000 |
| C | 2.354638  | -0.024150 | 0.000000 |
| H | 3.427922  | 0.105746  | 0.000000 |
| N | 1.518354  | 1.076530  | 0.000000 |

SI-122\*

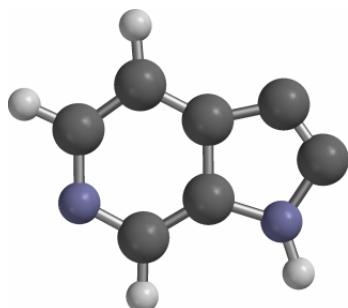

|   |           |           |          |
|---|-----------|-----------|----------|
| C | 0.353290  | -0.616104 | 0.000000 |
| C | -2.059942 | 0.611563  | 0.000000 |
| C | -0.831773 | -1.345538 | 0.000000 |
| C | 0.308370  | 0.832495  | 0.000000 |
| C | -0.945058 | 1.446416  | 0.000000 |
| N | -2.020290 | -0.735924 | 0.000000 |
| H | -0.833203 | -2.435972 | 0.000000 |
| H | -1.053480 | 2.526318  | 0.000000 |
| H | -3.056917 | 1.047224  | 0.000000 |
| N | 1.710503  | -1.011424 | 0.000000 |
| H | 2.048455  | -1.962186 | 0.000000 |
| C | 2.448622  | 0.142584  | 0.000000 |
| C | 1.700598  | 1.146030  | 0.000000 |

SI-125\*

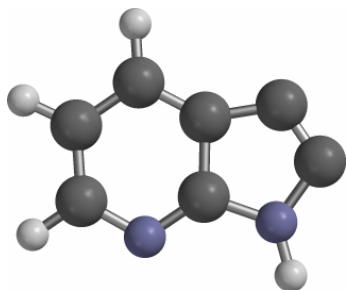

|   |           |           |          |
|---|-----------|-----------|----------|
| C | 0.312378  | -0.862952 | 0.000000 |
| C | -1.920405 | 0.750632  | 0.000000 |
| C | 0.328864  | 0.599645  | 0.000000 |
| C | -0.938451 | -1.472290 | 0.000000 |
| C | -2.064735 | -0.643167 | 0.000000 |
| N | -0.729000 | 1.369626  | 0.000000 |
| H | -1.038237 | -2.553506 | 0.000000 |
| H | -3.060738 | -1.074774 | 0.000000 |
| H | -2.795597 | 1.395573  | 0.000000 |
| N | 1.674593  | 1.022945  | 0.000000 |
| H | 1.967430  | 1.989524  | 0.000000 |
| C | 2.444261  | -0.115915 | 0.000000 |
| C | 1.707645  | -1.133365 | 0.000000 |

SI-127\*

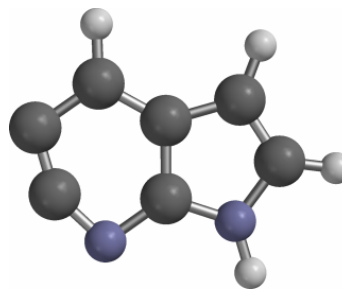

|   |           |           |          |
|---|-----------|-----------|----------|
| H | -1.169342 | -2.513799 | 0.000000 |
| C | -1.136286 | -1.424670 | 0.000000 |
| N | -1.017741 | 1.479876  | 0.000000 |
| C | 0.106311  | -0.738579 | 0.000000 |
| C | -2.296932 | -0.617256 | 0.000000 |
| C | -1.947303 | 0.603517  | 0.000000 |
| C | 0.106942  | 0.699308  | 0.000000 |
| C | 1.492099  | -1.124699 | 0.000000 |
| H | 1.883025  | -2.132787 | 0.000000 |
| C | 2.240546  | 0.021295  | 0.000000 |
| H | 3.313407  | 0.153575  | 0.000000 |
| N | 1.402852  | 1.129968  | 0.000000 |
| H | 1.687295  | 2.097619  | 0.000000 |

SI-126\*

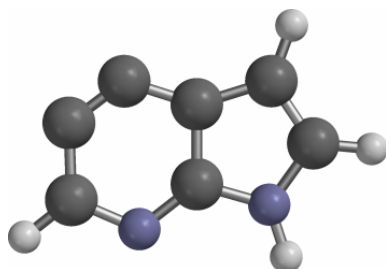

|   |           |           |          |
|---|-----------|-----------|----------|
| C | -1.019176 | -1.452085 | 0.000000 |
| N | -1.050878 | 1.256190  | 0.000000 |
| C | 0.244872  | -0.887963 | 0.000000 |
| C | -2.097846 | -0.811925 | 0.000000 |
| C | -2.214404 | 0.583929  | 0.000000 |
| C | 0.082766  | 0.560812  | 0.000000 |
| H | -3.134990 | 1.156764  | 0.000000 |
| C | 1.644940  | -1.156716 | 0.000000 |
| H | 2.125966  | -2.124038 | 0.000000 |
| C | 2.280057  | 0.062048  | 0.000000 |
| H | 3.337531  | 0.285476  | 0.000000 |
| N | 1.354262  | 1.085585  | 0.000000 |
| H | 1.558631  | 2.073267  | 0.000000 |

SI-128\*

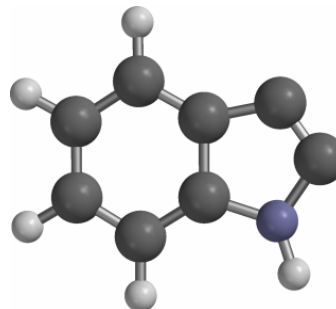

|   |           |           |          |
|---|-----------|-----------|----------|
| H | -0.955078 | -2.566511 | 0.000000 |
| C | -0.909617 | -1.481663 | 0.000000 |
| C | -0.815439 | 1.378124  | 0.000000 |
| C | 0.322385  | -0.824155 | 0.000000 |
| C | -2.073912 | -0.716482 | 0.000000 |
| C | -2.028162 | 0.688590  | 0.000000 |
| C | 0.357380  | 0.627621  | 0.000000 |
| H | -3.038443 | -1.216179 | 0.000000 |
| H | -2.956693 | 1.252455  | 0.000000 |
| H | -0.789165 | 2.465238  | 0.000000 |
| C | 1.722783  | -1.122336 | 0.000000 |
| C | 2.467265  | -0.117525 | 0.000000 |
| N | 1.711292  | 1.029816  | 0.000000 |
| H | 2.039132  | 1.983915  | 0.000000 |

SI-129\*

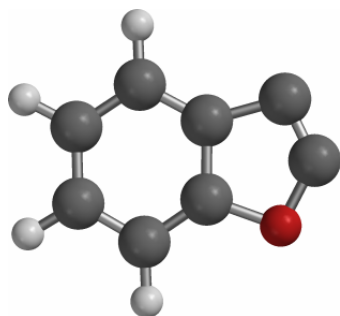

|   |           |           |          |
|---|-----------|-----------|----------|
| H | -0.724179 | -2.503237 | 0.000000 |
| C | -0.779898 | -1.419684 | 0.000000 |
| C | -0.891210 | 1.451392  | 0.000000 |
| C | 0.350708  | -0.631449 | 0.000000 |
| C | -2.000793 | -0.731184 | 0.000000 |
| C | -2.051223 | 0.670032  | 0.000000 |
| C | 0.342923  | 0.802267  | 0.000000 |
| H | -2.925831 | -1.300189 | 0.000000 |
| H | -3.019246 | 1.163074  | 0.000000 |
| H | -0.945538 | 2.535235  | 0.000000 |
| C | 1.761283  | 1.204392  | 0.000000 |
| C | 2.308303  | 0.091222  | 0.000000 |
| O | 1.704096  | -1.098421 | 0.000000 |

SI-131

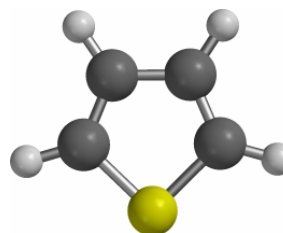

|   |           |          |           |
|---|-----------|----------|-----------|
| C | 0.714739  | 0.000000 | 1.267680  |
| H | 1.319482  | 0.000000 | 2.168299  |
| C | 1.243534  | 0.000000 | 0.006768  |
| H | 2.284636  | 0.000000 | -0.286596 |
| C | -0.714739 | 0.000000 | 1.267680  |
| H | -1.319482 | 0.000000 | 2.168299  |
| C | -1.243534 | 0.000000 | 0.006768  |
| H | -2.284636 | 0.000000 | -0.286596 |
| S | 0.000000  | 0.000000 | -1.204293 |

SI-132\*

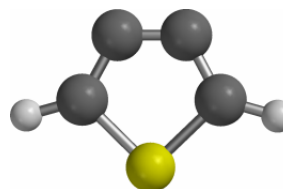

|   |           |          |           |
|---|-----------|----------|-----------|
| C | 0.637374  | 0.000000 | 1.363027  |
| C | 1.278310  | 0.000000 | 0.167900  |
| H | 2.319786  | 0.000000 | -0.124165 |
| C | -0.637374 | 0.000000 | 1.363027  |
| C | -1.278310 | 0.000000 | 0.167900  |
| H | -2.319786 | 0.000000 | -0.124165 |
| S | 0.000000  | 0.000000 | -1.069113 |

SI-130\*

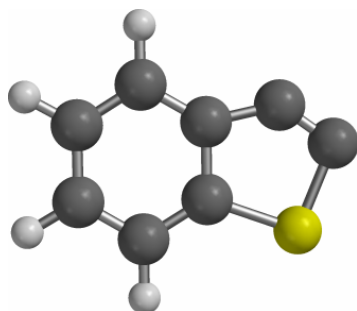

|   |           |           |          |
|---|-----------|-----------|----------|
| H | -0.781308 | -2.472060 | 0.000000 |
| C | -0.946336 | -1.397504 | 0.000000 |
| C | -1.392755 | 1.415172  | 0.000000 |
| C | 0.127610  | -0.513042 | 0.000000 |
| C | -2.238145 | -0.870921 | 0.000000 |
| C | -2.455617 | 0.516903  | 0.000000 |
| C | -0.091589 | 0.902841  | 0.000000 |
| H | -3.089165 | -1.545876 | 0.000000 |
| H | -3.472987 | 0.897167  | 0.000000 |
| H | -1.563706 | 2.486914  | 0.000000 |
| C | 1.235789  | 1.399299  | 0.000000 |
| C | 2.349911  | 0.833143  | 0.000000 |
| S | 1.907628  | -0.862472 | 0.000000 |

SI-133\*

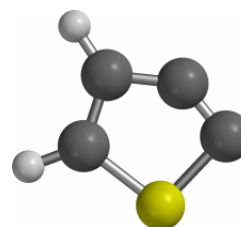

|   |           |           |          |
|---|-----------|-----------|----------|
| C | 1.000778  | 0.834889  | 0.000000 |
| C | -0.104263 | 1.438999  | 0.000000 |
| C | 1.410095  | -0.512513 | 0.000000 |
| H | 2.404679  | -0.933919 | 0.000000 |
| C | 0.204330  | -1.171916 | 0.000000 |
| H | 0.021088  | -2.241119 | 0.000000 |
| S | -1.125938 | 0.017570  | 0.000000 |

SI-134

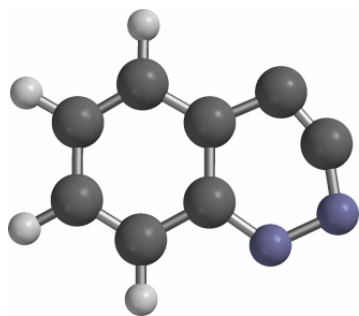

|   |           |           |          |
|---|-----------|-----------|----------|
| C | 2.233494  | 0.594894  | 0.000000 |
| C | 1.338159  | 1.485057  | 0.000000 |
| N | 1.325421  | -1.322381 | 0.000000 |
| C | 0.067390  | 0.840391  | 0.000000 |
| N | 2.517138  | -0.669201 | 0.000000 |
| C | 0.160747  | -0.618827 | 0.000000 |
| C | -1.210548 | 1.453755  | 0.000000 |
| H | -0.962415 | -2.465514 | 0.000000 |
| C | -2.343633 | 0.672738  | 0.000000 |
| H | -1.267741 | 2.537312  | 0.000000 |
| H | -3.322985 | 1.143312  | 0.000000 |
| C | -2.259078 | -0.746249 | 0.000000 |
| H | -3.174344 | -1.331248 | 0.000000 |
| C | -1.043028 | -1.383753 | 0.000000 |

SI-136

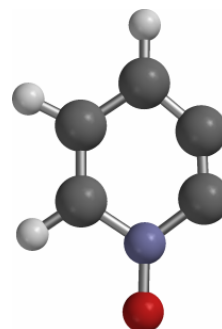

|   |           |           |          |
|---|-----------|-----------|----------|
| C | -0.911132 | -1.257399 | 0.000000 |
| C | 0.174736  | 1.076263  | 0.000000 |
| C | 0.334200  | -1.189921 | 0.000000 |
| C | -1.888359 | -0.285181 | 0.000000 |
| C | -1.210852 | 0.957630  | 0.000000 |
| H | -2.964558 | -0.394400 | 0.000000 |
| H | -1.786513 | 1.880521  | 0.000000 |
| H | 0.697482  | 2.023682  | 0.000000 |
| N | 1.048993  | -0.021130 | 0.000000 |
| O | 2.294319  | 0.125613  | 0.000000 |

SI-137

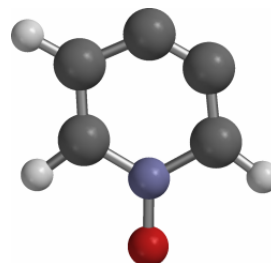

|   |           |           |          |
|---|-----------|-----------|----------|
| C | -1.050925 | -1.271657 | 0.000000 |
| C | 0.032534  | 1.138350  | 0.000000 |
| C | 0.317248  | -1.270615 | 0.000000 |
| C | -1.775688 | -0.251787 | 0.000000 |
| C | -1.357905 | 1.068814  | 0.000000 |
| H | 1.048606  | -2.066394 | 0.000000 |
| H | -1.974435 | 1.960777  | 0.000000 |
| H | 0.589658  | 2.065333  | 0.000000 |
| N | 0.861999  | 0.019677  | 0.000000 |
| O | 2.126003  | 0.161617  | 0.000000 |

SI-135

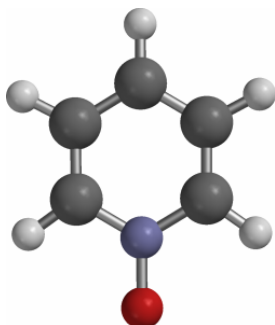

|   |           |           |          |
|---|-----------|-----------|----------|
| C | -0.280947 | -1.172238 | 0.000000 |
| H | -0.918779 | -2.045875 | 0.000000 |
| C | 1.101829  | -1.197442 | 0.000000 |
| H | 1.597909  | -2.163153 | 0.000000 |
| C | 1.833941  | -0.008525 | 0.000000 |
| H | 2.918331  | -0.017146 | 0.000000 |
| C | 1.120860  | 1.191907  | 0.000000 |
| H | 1.632488  | 2.149465  | 0.000000 |
| C | -0.262173 | 1.188768  | 0.000000 |
| H | -0.885962 | 2.072490  | 0.000000 |
| N | -0.975369 | 0.013894  | 0.000000 |
| O | -2.249704 | 0.024046  | 0.000000 |

SI-138

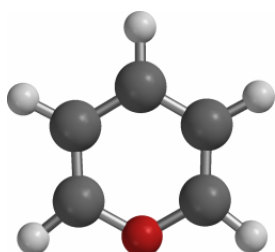

|   |           |          |           |
|---|-----------|----------|-----------|
| H | 0.000000  | 0.000000 | 2.498849  |
| C | 0.000000  | 0.000000 | 1.412619  |
| C | 1.211328  | 0.000000 | 0.707751  |
| C | -1.211328 | 0.000000 | 0.707751  |
| C | -1.164638 | 0.000000 | -0.667049 |
| C | 1.164638  | 0.000000 | -0.667049 |
| H | 2.171940  | 0.000000 | 1.210711  |
| H | -2.171940 | 0.000000 | 1.210711  |
| H | -2.011743 | 0.000000 | -1.343003 |
| H | 2.011743  | 0.000000 | -1.343003 |
| O | 0.000000  | 0.000000 | -1.314931 |

SI-141

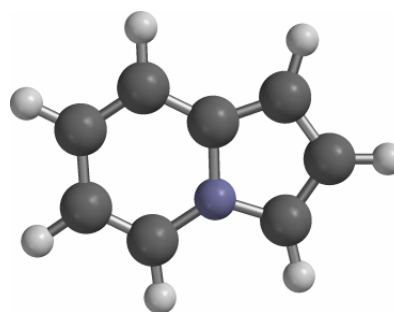

|   |           |           |          |
|---|-----------|-----------|----------|
| C | 0.985853  | -1.410868 | 0.000000 |
| H | 1.002258  | -2.496667 | 0.000000 |
| C | 2.147258  | -0.681094 | 0.000000 |
| H | 3.111246  | -1.179893 | 0.000000 |
| C | 2.089245  | 0.745491  | 0.000000 |
| H | 2.998524  | 1.336832  | 0.000000 |
| C | 0.885130  | 1.384807  | 0.000000 |
| H | 0.771230  | 2.462965  | 0.000000 |
| N | -0.284342 | 0.656645  | 0.000000 |
| C | -0.273123 | -0.760583 | 0.000000 |
| C | -1.602787 | -1.179063 | 0.000000 |
| H | -1.934435 | -2.208247 | 0.000000 |
| C | -2.410275 | -0.022979 | 0.000000 |
| H | -3.492191 | 0.005952  | 0.000000 |
| C | -1.588084 | 1.092018  | 0.000000 |
| H | -1.818780 | 2.147461  | 0.000000 |

SI-139

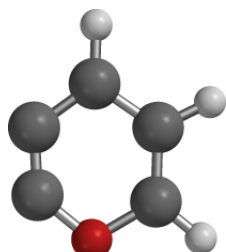

|   |           |           |          |
|---|-----------|-----------|----------|
| C | 0.454895  | -1.225561 | 0.000000 |
| C | -0.785266 | -1.155000 | 0.000000 |
| H | -2.550219 | 0.192683  | 0.000000 |
| C | -1.474050 | 0.044524  | 0.000000 |
| H | -0.913948 | 2.157912  | 0.000000 |
| C | -0.545853 | 1.134908  | 0.000000 |
| H | 1.585512  | 1.710206  | 0.000000 |
| C | 0.818547  | 0.944676  | 0.000000 |
| O | 1.377587  | -0.317977 | 0.000000 |

SI-142\*

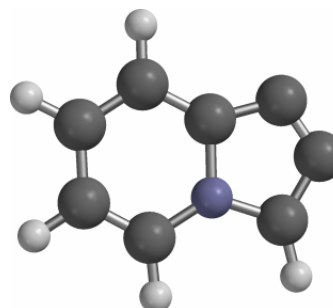

|   |           |           |          |
|---|-----------|-----------|----------|
| N | -0.362636 | -0.642801 | 0.000000 |
| C | -1.683130 | -1.103781 | 0.000000 |
| H | -1.914526 | -2.157179 | 0.000000 |
| C | -2.427388 | 0.063740  | 0.000000 |
| C | -1.733090 | 1.121371  | 0.000000 |
| C | -0.375337 | 0.803022  | 0.000000 |
| C | 0.865621  | 1.471486  | 0.000000 |
| H | 0.862039  | 2.556695  | 0.000000 |
| C | 2.040592  | 0.755744  | 0.000000 |
| H | 2.995118  | 1.272019  | 0.000000 |
| C | 2.009946  | -0.667397 | 0.000000 |
| H | 2.932884  | -1.237467 | 0.000000 |
| C | 0.821487  | -1.342826 | 0.000000 |
| H | 0.739942  | -2.424111 | 0.000000 |

SI-140

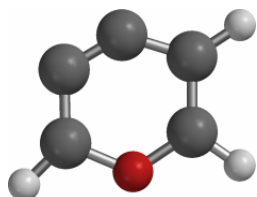

|   |           |           |          |
|---|-----------|-----------|----------|
| C | -0.937371 | -0.973150 | 0.000000 |
| C | -1.443687 | 0.302463  | 0.000000 |
| C | 0.234856  | -1.423301 | 0.000000 |
| C | 1.282754  | -0.558963 | 0.000000 |
| C | -0.344502 | 1.171646  | 0.000000 |
| H | -2.470079 | 0.651281  | 0.000000 |
| H | 2.358036  | -0.691729 | 0.000000 |
| H | -0.414822 | 2.255154  | 0.000000 |
| O | 0.917601  | 0.752772  | 0.000000 |

SI-143\*

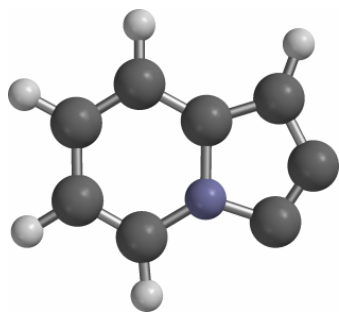

|   |           |           |          |
|---|-----------|-----------|----------|
| N | -0.360769 | -0.733120 | 0.000000 |
| C | -1.662703 | -1.173881 | 0.000000 |
| C | -2.381975 | -0.140655 | 0.000000 |
| C | -1.752135 | 1.114722  | 0.000000 |
| H | -2.133908 | 2.123515  | 0.000000 |
| C | -0.392903 | 0.712875  | 0.000000 |
| C | 0.845674  | 1.398380  | 0.000000 |
| H | 0.841256  | 2.484384  | 0.000000 |
| C | 2.021405  | 0.689426  | 0.000000 |
| H | 2.971623  | 1.214385  | 0.000000 |
| C | 2.010094  | -0.738760 | 0.000000 |
| H | 2.940124  | -1.296622 | 0.000000 |
| C | 0.830500  | -1.423327 | 0.000000 |
| H | 0.746478  | -2.503086 | 0.000000 |

SI-145

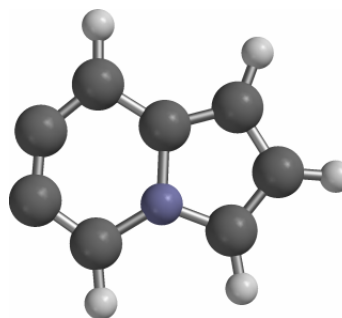

|   |           |           |          |
|---|-----------|-----------|----------|
| C | 1.052936  | -1.424746 | 0.000000 |
| H | 0.935602  | -2.502423 | 0.000000 |
| C | 2.176328  | -0.667379 | 0.000000 |
| C | 2.108449  | 0.598520  | 0.000000 |
| C | 1.091997  | 1.486800  | 0.000000 |
| H | 1.119618  | 2.569923  | 0.000000 |
| C | -0.153563 | 0.762776  | 0.000000 |
| N | -0.131351 | -0.671248 | 0.000000 |
| C | -1.492151 | 1.148650  | 0.000000 |
| H | -1.844650 | 2.170732  | 0.000000 |
| C | -2.274436 | -0.024387 | 0.000000 |
| H | -3.355872 | -0.074834 | 0.000000 |
| C | -1.429028 | -1.122196 | 0.000000 |
| H | -1.642203 | -2.181203 | 0.000000 |

SI-144

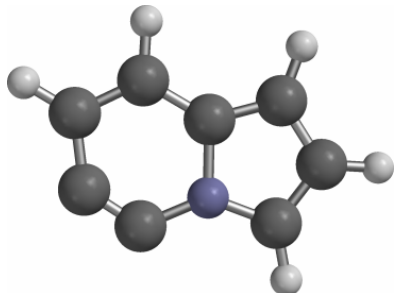

|   |           |           |          |
|---|-----------|-----------|----------|
| C | 1.975691  | -0.932453 | 0.000000 |
| C | -0.131848 | 0.667063  | 0.000000 |
| C | 0.855118  | -1.456005 | 0.000000 |
| N | -0.311203 | -0.767719 | 0.000000 |
| C | -1.417847 | 1.205674  | 0.000000 |
| H | -1.652384 | 2.261424  | 0.000000 |
| C | -2.340495 | 0.138699  | 0.000000 |
| H | -3.418844 | 0.227953  | 0.000000 |
| C | -1.646621 | -1.062995 | 0.000000 |
| H | -1.988984 | -2.086676 | 0.000000 |
| C | 2.342787  | 0.429443  | 0.000000 |
| H | 3.342333  | 0.844607  | 0.000000 |
| C | 1.189693  | 1.204036  | 0.000000 |
| H | 1.282330  | 2.287218  | 0.000000 |

SI-146

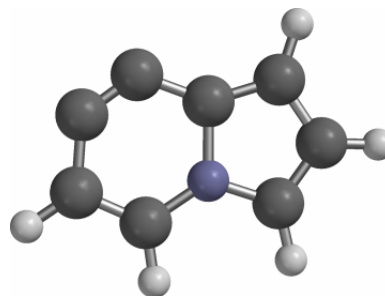

|   |           |           |          |
|---|-----------|-----------|----------|
| C | 2.293305  | 0.475883  | 0.000000 |
| H | 3.258616  | 0.965470  | 0.000000 |
| C | 2.019226  | -0.904714 | 0.000000 |
| C | 0.935122  | -1.503578 | 0.000000 |
| C | -0.314180 | -0.867349 | 0.000000 |
| C | 1.111611  | 1.186789  | 0.000000 |
| H | 1.090726  | 2.271151  | 0.000000 |
| N | -0.127107 | 0.575632  | 0.000000 |
| C | -1.676278 | -1.102138 | 0.000000 |
| H | -2.140749 | -2.077683 | 0.000000 |
| C | -2.326428 | 0.156399  | 0.000000 |
| H | -3.396127 | 0.319972  | 0.000000 |
| C | -1.376427 | 1.158451  | 0.000000 |
| H | -1.486269 | 2.233229  | 0.000000 |

SI-147

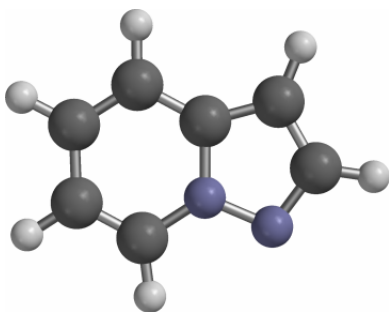

|   |           |           |          |
|---|-----------|-----------|----------|
| C | 0.955270  | -1.439384 | 0.000000 |
| H | 0.964631  | -2.524650 | 0.000000 |
| C | 0.881046  | 1.364490  | 0.000000 |
| H | 0.747977  | 2.438904  | 0.000000 |
| C | -0.292218 | -0.765912 | 0.000000 |
| C | -1.644662 | -1.115156 | 0.000000 |
| H | -2.057072 | -2.113273 | 0.000000 |
| C | -2.328768 | 0.107273  | 0.000000 |
| H | -3.399015 | 0.271347  | 0.000000 |
| N | -0.275309 | 0.634145  | 0.000000 |
| N | -1.515576 | 1.174320  | 0.000000 |
| C | 2.081704  | 0.711765  | 0.000000 |
| H | 2.998026  | 1.291301  | 0.000000 |
| C | 2.120550  | -0.712575 | 0.000000 |
| H | 3.079990  | -1.220602 | 0.000000 |

SI-149

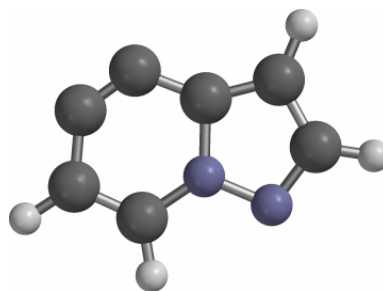

|   |           |           |          |
|---|-----------|-----------|----------|
| C | 2.275585  | 0.475868  | 0.000000 |
| H | 3.239677  | 0.967358  | 0.000000 |
| C | 2.005155  | -0.903983 | 0.000000 |
| C | 0.929434  | -1.519544 | 0.000000 |
| C | -0.316264 | -0.876635 | 0.000000 |
| C | 1.087939  | 1.179469  | 0.000000 |
| H | 1.027863  | 2.260720  | 0.000000 |
| N | -0.132066 | 0.544089  | 0.000000 |
| N | -1.316505 | 1.199983  | 0.000000 |
| C | -1.689103 | -1.069572 | 0.000000 |
| H | -2.210862 | -2.014291 | 0.000000 |
| C | -2.233930 | 0.226800  | 0.000000 |
| H | -3.280910 | 0.502594  | 0.000000 |

SI-150

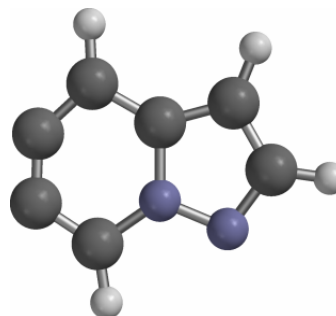

|   |           |           |          |
|---|-----------|-----------|----------|
| H | -1.157990 | -2.568816 | 0.000000 |
| C | -1.099548 | -1.487303 | 0.000000 |
| C | -2.094437 | -0.569447 | 0.000000 |
| C | -2.128015 | 0.695302  | 0.000000 |
| C | 0.154797  | -0.782953 | 0.000000 |
| H | 1.902468  | -2.147346 | 0.000000 |
| C | 1.503354  | -1.143932 | 0.000000 |
| C | -0.986664 | 1.430641  | 0.000000 |
| H | -0.816807 | 2.499762  | 0.000000 |
| N | 0.157881  | 0.636670  | 0.000000 |
| N | 1.406336  | 1.146356  | 0.000000 |
| H | 3.277695  | 0.215117  | 0.000000 |
| C | 2.204704  | 0.068149  | 0.000000 |

SI-148\*

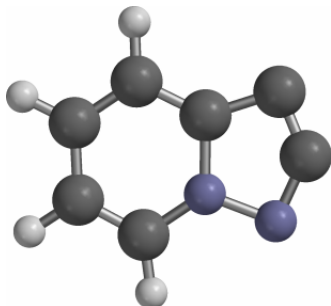

|   |           |           |          |
|---|-----------|-----------|----------|
| N | -0.367279 | -0.644900 | 0.000000 |
| N | -1.657701 | -1.163738 | 0.000000 |
| C | -2.225445 | 0.019824  | 0.000000 |
| C | -1.765628 | 1.205971  | 0.000000 |
| C | -0.405132 | 0.800988  | 0.000000 |
| C | 0.778545  | -1.380589 | 0.000000 |
| H | 0.655044  | -2.456258 | 0.000000 |
| C | 1.976566  | -0.713141 | 0.000000 |
| H | 2.895760  | -1.288301 | 0.000000 |
| C | 2.011241  | 0.706205  | 0.000000 |
| H | 2.971809  | 1.212306  | 0.000000 |
| C | 0.849465  | 1.448559  | 0.000000 |
| H | 0.866135  | 2.532780  | 0.000000 |



SI-151

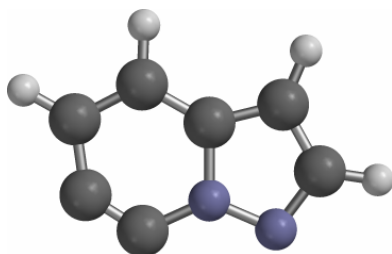

|   |           |           |          |
|---|-----------|-----------|----------|
| C | 1.934720  | -0.938155 | 0.000000 |
| C | 2.314615  | 0.414566  | 0.000000 |
| H | 3.320214  | 0.815954  | 0.000000 |
| C | 1.175967  | 1.213007  | 0.000000 |
| H | 1.284665  | 2.294112  | 0.000000 |
| C | -0.147201 | 0.681005  | 0.000000 |
| C | 0.807867  | -1.452730 | 0.000000 |
| N | -0.333607 | -0.737198 | 0.000000 |
| N | -1.623579 | -1.103545 | 0.000000 |
| C | -1.447399 | 1.188949  | 0.000000 |
| H | -1.737709 | 2.229426  | 0.000000 |
| C | -2.285928 | 0.065376  | 0.000000 |
| H | -3.368099 | 0.047320  | 0.000000 |

SI-153

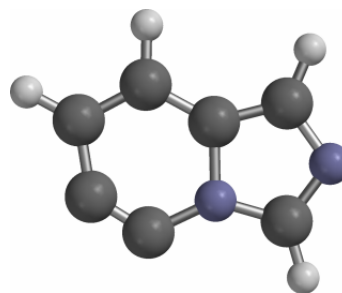

|   |           |           |          |
|---|-----------|-----------|----------|
| C | 1.944611  | 0.942233  | 0.000000 |
| C | 0.827925  | 1.472035  | 0.000000 |
| C | -0.138051 | -0.672631 | 0.000000 |
| C | -1.436359 | -1.166020 | 0.000000 |
| H | -1.746479 | -2.202665 | 0.000000 |
| N | -2.350837 | -0.155463 | 0.000000 |
| C | -1.673980 | 0.981945  | 0.000000 |
| H | -2.093674 | 1.977671  | 0.000000 |
| N | -0.329393 | 0.756956  | 0.000000 |
| C | 2.328441  | -0.417530 | 0.000000 |
| H | 3.333391  | -0.818837 | 0.000000 |
| C | 1.187801  | -1.205048 | 0.000000 |
| H | 1.291218  | -2.286973 | 0.000000 |

SI-152

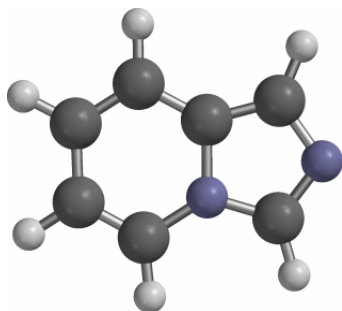

|   |           |           |          |
|---|-----------|-----------|----------|
| N | 0.281407  | -0.661682 | 0.000000 |
| C | -0.896857 | -1.382125 | 0.000000 |
| H | -0.797350 | -2.461452 | 0.000000 |
| C | -2.085499 | -0.719742 | 0.000000 |
| H | -3.006823 | -1.292105 | 0.000000 |
| C | -2.120971 | 0.712492  | 0.000000 |
| H | -3.079138 | 1.222143  | 0.000000 |
| C | -0.953930 | 1.429067  | 0.000000 |
| H | -0.956213 | 2.514605  | 0.000000 |
| C | 0.293047  | 0.751933  | 0.000000 |
| C | 1.641704  | 1.088772  | 0.000000 |
| H | 2.072389  | 2.081001  | 0.000000 |
| N | 2.418821  | -0.030433 | 0.000000 |
| C | 1.592483  | -1.061899 | 0.000000 |
| H | 1.875013  | -2.105766 | 0.000000 |

SI-154

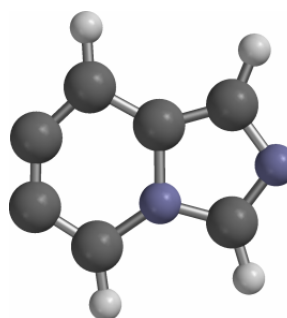

|   |           |           |          |
|---|-----------|-----------|----------|
| C | 2.093747  | 0.590816  | 0.000000 |
| C | 1.088443  | 1.488209  | 0.000000 |
| H | 1.123106  | 2.570950  | 0.000000 |
| C | 2.155528  | -0.677672 | 0.000000 |
| C | 1.035868  | -1.435382 | 0.000000 |
| H | 0.913654  | -2.512127 | 0.000000 |
| N | -0.144879 | -0.666672 | 0.000000 |
| C | -0.159761 | 0.763085  | 0.000000 |
| C | -1.509063 | 1.094349  | 0.000000 |
| H | -1.938430 | 2.087085  | 0.000000 |
| N | -2.285795 | -0.024155 | 0.000000 |
| C | -1.457653 | -1.055790 | 0.000000 |
| H | -1.744624 | -2.098361 | 0.000000 |

SI-155

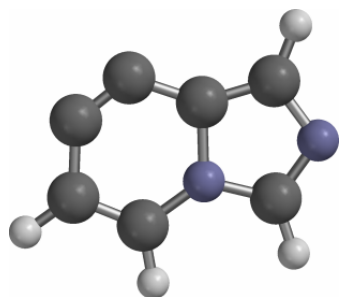

|   |           |           |          |
|---|-----------|-----------|----------|
| C | 2.281077  | 0.472816  | 0.000000 |
| H | 3.250501  | 0.954086  | 0.000000 |
| C | 1.108408  | 1.192372  | 0.000000 |
| H | 1.090572  | 2.276538  | 0.000000 |
| C | 2.000547  | -0.909577 | 0.000000 |
| C | 0.920951  | -1.514269 | 0.000000 |
| C | -0.323521 | -0.862460 | 0.000000 |
| C | -1.692028 | -1.030864 | 0.000000 |
| H | -2.239805 | -1.962602 | 0.000000 |
| N | -2.330125 | 0.179391  | 0.000000 |
| C | -1.396873 | 1.109504  | 0.000000 |
| H | -1.570575 | 2.177254  | 0.000000 |
| N | -0.131950 | 0.575992  | 0.000000 |

SI-157\*

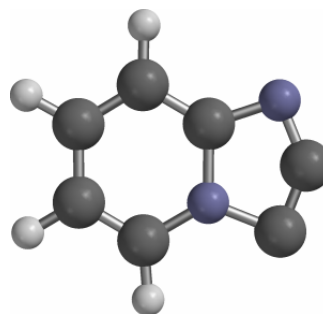

|   |           |           |          |
|---|-----------|-----------|----------|
| N | -0.387277 | -0.718795 | 0.000000 |
| C | -1.713263 | -1.249666 | 0.000000 |
| C | -2.192037 | -0.045979 | 0.000000 |
| N | -1.711198 | 1.148708  | 0.000000 |
| C | -0.406472 | 0.723768  | 0.000000 |
| C | 0.802570  | -1.400705 | 0.000000 |
| H | 0.720900  | -2.479883 | 0.000000 |
| C | 1.979120  | -0.698476 | 0.000000 |
| H | 2.913910  | -1.248406 | 0.000000 |
| C | 1.982898  | 0.721730  | 0.000000 |
| H | 2.930281  | 1.251498  | 0.000000 |
| C | 0.802716  | 1.435800  | 0.000000 |
| H | 0.774939  | 2.519556  | 0.000000 |

SI-156

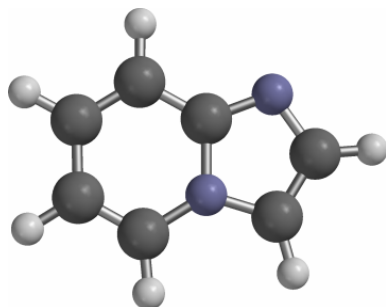

|   |           |           |          |
|---|-----------|-----------|----------|
| N | 0.301270  | -0.670655 | 0.000000 |
| C | -0.859527 | -1.405762 | 0.000000 |
| H | -0.748805 | -2.483977 | 0.000000 |
| C | -2.062688 | -0.758186 | 0.000000 |
| H | -2.974841 | -1.344854 | 0.000000 |
| C | -2.115384 | 0.665395  | 0.000000 |
| H | -3.079570 | 1.163992  | 0.000000 |
| C | -0.955621 | 1.401522  | 0.000000 |
| H | -0.954598 | 2.485917  | 0.000000 |
| C | 0.294799  | 0.740774  | 0.000000 |
| C | 1.626549  | -1.051249 | 0.000000 |
| H | 1.924399  | -2.088805 | 0.000000 |
| N | 1.534692  | 1.225608  | 0.000000 |
| C | 2.343221  | 0.128580  | 0.000000 |
| H | 3.421413  | 0.229373  | 0.000000 |

SI-158

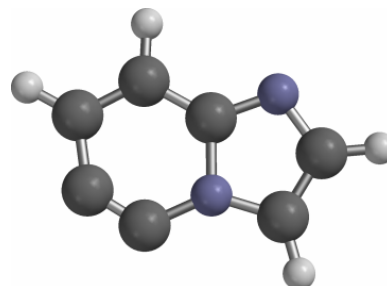

|   |           |           |          |
|---|-----------|-----------|----------|
| C | 1.956281  | 0.945218  | 0.000000 |
| C | 0.833957  | 1.469360  | 0.000000 |
| C | -0.153631 | -0.652219 | 0.000000 |
| C | -1.676252 | 1.018977  | 0.000000 |
| H | -2.079497 | 2.019369  | 0.000000 |
| N | -0.324416 | 0.776473  | 0.000000 |
| N | -1.342834 | -1.240959 | 0.000000 |
| C | -2.261706 | -0.233081 | 0.000000 |
| H | -3.322210 | -0.449552 | 0.000000 |
| C | 2.313169  | -0.418311 | 0.000000 |
| H | 3.314028  | -0.831601 | 0.000000 |
| C | 1.165603  | -1.198824 | 0.000000 |
| H | 1.240345  | -2.281542 | 0.000000 |

SI-159

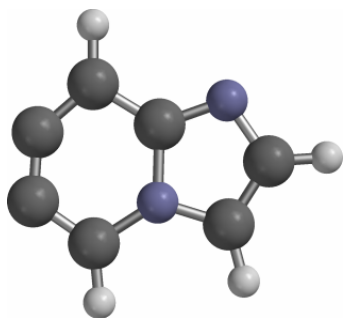

|   |           |           |          |
|---|-----------|-----------|----------|
| C | 2.078096  | 0.587768  | 0.000000 |
| C | 1.061667  | 1.479712  | 0.000000 |
| H | 1.068533  | 2.562072  | 0.000000 |
| C | 2.153808  | -0.675355 | 0.000000 |
| C | 1.030715  | -1.442329 | 0.000000 |
| H | 0.923821  | -2.520975 | 0.000000 |
| N | -0.142533 | -0.688086 | 0.000000 |
| C | -0.173426 | 0.744543  | 0.000000 |
| C | -1.461962 | -1.084555 | 0.000000 |
| H | -1.743680 | -2.126598 | 0.000000 |
| C | -2.205195 | 0.078945  | 0.000000 |
| H | -3.285565 | 0.155531  | 0.000000 |
| N | -1.421582 | 1.194032  | 0.000000 |

SI-161

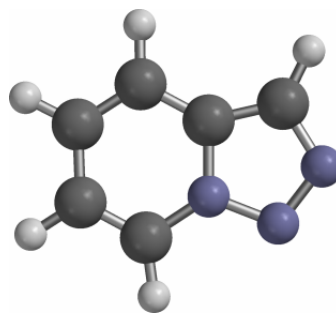

|   |           |           |          |
|---|-----------|-----------|----------|
| C | 0.884290  | -1.364703 | 0.000000 |
| H | 0.759331  | -2.440149 | 0.000000 |
| C | 0.933747  | 1.449014  | 0.000000 |
| H | 0.932503  | 2.533992  | 0.000000 |
| N | -0.274629 | -0.633293 | 0.000000 |
| C | -0.301904 | 0.755171  | 0.000000 |
| C | -1.668009 | 1.034773  | 0.000000 |
| H | -2.167270 | 1.992533  | 0.000000 |
| N | -2.355528 | -0.126783 | 0.000000 |
| N | -1.533143 | -1.151436 | 0.000000 |
| C | 2.102661  | 0.730107  | 0.000000 |
| H | 3.059057  | 1.243348  | 0.000000 |
| C | 2.075240  | -0.697735 | 0.000000 |
| H | 2.998968  | -1.265589 | 0.000000 |

SI-160

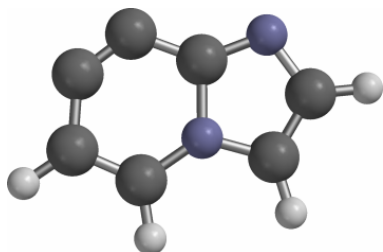

|   |           |           |          |
|---|-----------|-----------|----------|
| C | 2.265243  | 0.473680  | 0.000000 |
| H | 3.237113  | 0.949901  | 0.000000 |
| C | 1.090481  | 1.201514  | 0.000000 |
| H | 1.079827  | 2.285858  | 0.000000 |
| C | 1.970949  | -0.897483 | 0.000000 |
| C | 0.889313  | -1.504015 | 0.000000 |
| C | -0.348238 | -0.845880 | 0.000000 |
| C | -1.414793 | 1.133340  | 0.000000 |
| H | -1.583078 | 2.199636  | 0.000000 |
| N | -0.143814 | 0.590685  | 0.000000 |
| N | -1.629629 | -1.141037 | 0.000000 |
| C | -2.280658 | 0.063444  | 0.000000 |
| H | -3.362126 | 0.107719  | 0.000000 |

SI-162

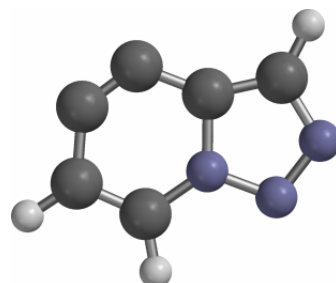

|   |           |           |          |
|---|-----------|-----------|----------|
| C | 2.269703  | 0.453028  | 0.000000 |
| H | 3.241310  | 0.929689  | 0.000000 |
| C | 1.982415  | -0.924738 | 0.000000 |
| C | 0.901625  | -1.530288 | 0.000000 |
| C | -0.328865 | -0.858663 | 0.000000 |
| C | 1.095716  | 1.176782  | 0.000000 |
| H | 1.050098  | 2.258833  | 0.000000 |
| N | -0.130171 | 0.547081  | 0.000000 |
| C | -1.708347 | -0.976019 | 0.000000 |
| H | -2.316551 | -1.867714 | 0.000000 |
| N | -2.257364 | 0.263051  | 0.000000 |
| N | -1.330590 | 1.188938  | 0.000000 |

SI-163

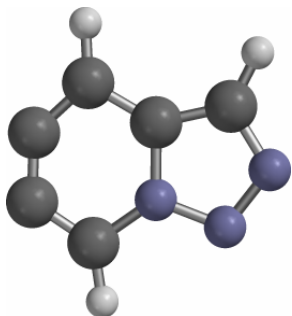

|   |           |           |          |
|---|-----------|-----------|----------|
| C | 1.026232  | -1.414449 | 0.000000 |
| H | 0.884907  | -2.487577 | 0.000000 |
| C | 2.142561  | -0.645165 | 0.000000 |
| C | 2.079622  | 0.619607  | 0.000000 |
| C | 1.062555  | 1.511251  | 0.000000 |
| H | 1.090486  | 2.593881  | 0.000000 |
| N | -0.136135 | -0.640064 | 0.000000 |
| C | -0.168352 | 0.766107  | 0.000000 |
| C | -1.536126 | 1.033418  | 0.000000 |
| H | -2.038230 | 1.989639  | 0.000000 |
| N | -2.220628 | -0.129386 | 0.000000 |
| N | -1.391536 | -1.150999 | 0.000000 |

SI-165

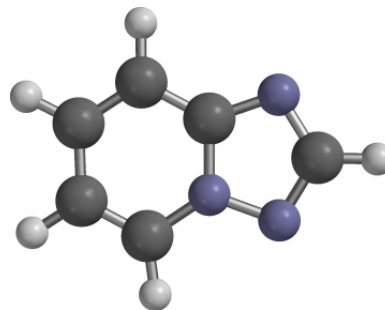

|   |           |           |          |
|---|-----------|-----------|----------|
| N | -0.310224 | -0.636561 | 0.000000 |
| N | -1.590937 | -1.088647 | 0.000000 |
| C | -2.275659 | 0.058107  | 0.000000 |
| H | -3.358178 | 0.046425  | 0.000000 |
| N | -1.558798 | 1.202375  | 0.000000 |
| C | -0.297361 | 0.756648  | 0.000000 |
| C | 0.954012  | 1.411926  | 0.000000 |
| H | 0.973509  | 2.495787  | 0.000000 |
| C | 2.100509  | 0.650426  | 0.000000 |
| H | 3.072191  | 1.134560  | 0.000000 |
| C | 2.032534  | -0.770617 | 0.000000 |
| H | 2.937977  | -1.366898 | 0.000000 |
| C | 0.817748  | -1.403457 | 0.000000 |
| H | 0.663277  | -2.474905 | 0.000000 |

SI-164

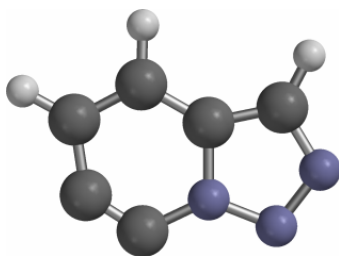

|   |           |           |          |
|---|-----------|-----------|----------|
| C | 1.913232  | -0.928176 | 0.000000 |
| C | -0.157344 | 0.682186  | 0.000000 |
| C | 0.793614  | -1.456871 | 0.000000 |
| N | -0.342082 | -0.724266 | 0.000000 |
| C | -1.473339 | 1.134446  | 0.000000 |
| H | -1.846520 | 2.148372  | 0.000000 |
| N | -2.316625 | 0.077573  | 0.000000 |
| N | -1.649217 | -1.057234 | 0.000000 |
| C | 2.298290  | 0.424049  | 0.000000 |
| H | 3.304807  | 0.822239  | 0.000000 |
| C | 1.161859  | 1.223900  | 0.000000 |
| H | 1.269925  | 2.304823  | 0.000000 |

SI-166

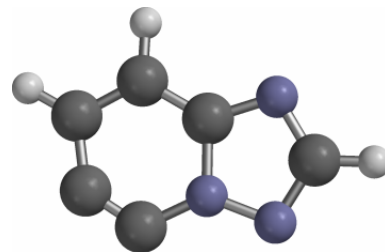

|   |           |           |          |
|---|-----------|-----------|----------|
| C | 1.909945  | -0.945109 | 0.000000 |
| C | -0.169918 | 0.665755  | 0.000000 |
| C | 0.785252  | -1.469555 | 0.000000 |
| N | -0.345829 | -0.744625 | 0.000000 |
| N | -1.380563 | 1.222595  | 0.000000 |
| C | -2.215867 | 0.158621  | 0.000000 |
| H | -3.292524 | 0.265799  | 0.000000 |
| N | -1.658494 | -1.056289 | 0.000000 |
| C | 2.282746  | 0.407950  | 0.000000 |
| H | 3.289116  | 0.808164  | 0.000000 |
| C | 1.146872  | 1.210712  | 0.000000 |
| H | 1.238209  | 2.291854  | 0.000000 |

SI-167

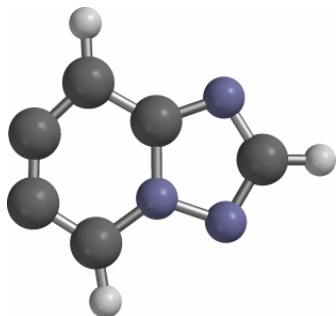

|   |           |           |          |
|---|-----------|-----------|----------|
| C | 0.996719  | -1.436848 | 0.000000 |
| H | 0.857413  | -2.510473 | 0.000000 |
| C | 2.124548  | -0.671518 | 0.000000 |
| C | 2.059041  | 0.589892  | 0.000000 |
| C | 1.048568  | 1.494896  | 0.000000 |
| H | 1.069729  | 2.576914  | 0.000000 |
| C | -0.179894 | 0.756439  | 0.000000 |
| N | -1.451978 | 1.155312  | 0.000000 |
| C | -2.136042 | -0.009071 | 0.000000 |
| H | -3.217871 | -0.050972 | 0.000000 |
| N | -1.417132 | -1.134627 | 0.000000 |
| N | -0.149538 | -0.660102 | 0.000000 |

SI-169

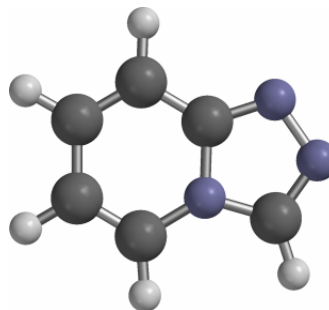

|   |           |           |          |
|---|-----------|-----------|----------|
| N | -0.312396 | -0.663455 | 0.000000 |
| N | -1.528803 | 1.209701  | 0.000000 |
| C | -0.287842 | 0.737217  | 0.000000 |
| C | 0.971174  | 1.392243  | 0.000000 |
| H | 0.985892  | 2.476231  | 0.000000 |
| C | 2.113174  | 0.636345  | 0.000000 |
| H | 3.086378  | 1.116966  | 0.000000 |
| C | 2.041803  | -0.793156 | 0.000000 |
| H | 2.948787  | -1.387469 | 0.000000 |
| C | 0.835344  | -1.426172 | 0.000000 |
| H | 0.705507  | -2.501926 | 0.000000 |
| N | -2.369981 | 0.132227  | 0.000000 |
| C | -1.650290 | -0.969331 | 0.000000 |
| H | -2.031127 | -1.980297 | 0.000000 |

SI-168

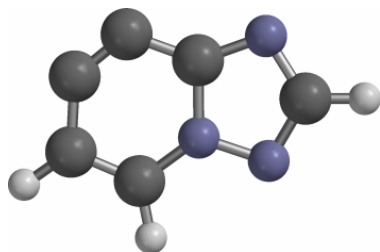

|   |           |           |          |
|---|-----------|-----------|----------|
| C | 2.245510  | 0.471106  | 0.000000 |
| H | 3.217060  | 0.947429  | 0.000000 |
| C | -0.351616 | -0.851251 | 0.000000 |
| C | 1.066621  | 1.195283  | 0.000000 |
| H | 1.021002  | 2.277273  | 0.000000 |
| N | -0.149238 | 0.561372  | 0.000000 |
| N | -1.651043 | -1.100422 | 0.000000 |
| C | -2.197159 | 0.140810  | 0.000000 |
| H | -3.267113 | 0.302915  | 0.000000 |
| N | -1.360342 | 1.177018  | 0.000000 |
| C | 1.952491  | -0.899236 | 0.000000 |
| C | 0.877698  | -1.520328 | 0.000000 |

SI-170

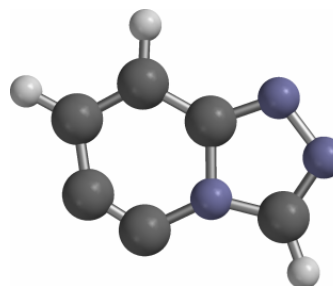

|   |           |           |          |
|---|-----------|-----------|----------|
| C | -0.799113 | -1.488208 | 0.000000 |
| C | -1.922355 | -0.969747 | 0.000000 |
| C | -2.303681 | 0.390987  | 0.000000 |
| H | -3.312265 | 0.784635  | 0.000000 |
| C | -1.175378 | 1.191886  | 0.000000 |
| H | -1.267854 | 2.273016  | 0.000000 |
| C | 0.153101  | 0.654300  | 0.000000 |
| N | 1.340737  | 1.237853  | 0.000000 |
| N | 2.293618  | 0.254317  | 0.000000 |
| C | 1.700893  | -0.922440 | 0.000000 |
| H | 2.189326  | -1.885126 | 0.000000 |
| N | 0.343772  | -0.759734 | 0.000000 |

SI-171

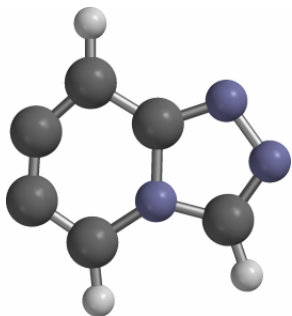

|   |           |           |          |
|---|-----------|-----------|----------|
| C | 1.004028  | -1.458906 | 0.000000 |
| H | 0.878496  | -2.535217 | 0.000000 |
| C | 2.130731  | -0.705787 | 0.000000 |
| C | 2.067297  | 0.561331  | 0.000000 |
| C | 1.074016  | 1.471575  | 0.000000 |
| H | 1.097377  | 2.553605  | 0.000000 |
| C | -0.172013 | 0.741767  | 0.000000 |
| N | -1.421628 | 1.179615  | 0.000000 |
| N | -2.238466 | 0.083525  | 0.000000 |
| C | -1.491847 | -1.001379 | 0.000000 |
| H | -1.855810 | -2.018561 | 0.000000 |
| N | -0.159721 | -0.677464 | 0.000000 |

SI-173

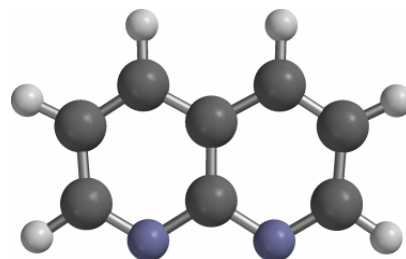

|   |           |          |           |
|---|-----------|----------|-----------|
| N | -1.154884 | 0.000000 | 1.426752  |
| C | -2.292941 | 0.000000 | 0.763537  |
| H | -3.199960 | 0.000000 | 1.368311  |
| C | -2.403481 | 0.000000 | -0.651109 |
| H | -3.383432 | 0.000000 | -1.118662 |
| C | -1.250124 | 0.000000 | -1.397122 |
| H | -1.277887 | 0.000000 | -2.484697 |
| C | 0.000000  | 0.000000 | -0.729176 |
| C | 0.000000  | 0.000000 | 0.704072  |
| N | 1.154884  | 0.000000 | 1.426752  |
| C | 2.292941  | 0.000000 | 0.763537  |
| H | 3.199960  | 0.000000 | 1.368311  |
| C | 2.403481  | 0.000000 | -0.651109 |
| H | 3.383432  | 0.000000 | -1.118662 |
| C | 1.250124  | 0.000000 | -1.397122 |
| H | 1.277887  | 0.000000 | -2.484697 |

SI-172

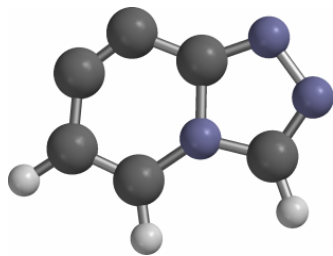

|   |           |           |          |
|---|-----------|-----------|----------|
| C | 1.073968  | -1.217013 | 0.000000 |
| H | 1.056947  | -2.301013 | 0.000000 |
| C | 2.244588  | -0.490724 | 0.000000 |
| H | 3.217280  | -0.964810 | 0.000000 |
| C | 1.951331  | 0.885237  | 0.000000 |
| C | 0.879681  | 1.504838  | 0.000000 |
| C | -0.356122 | 0.833775  | 0.000000 |
| N | -1.641132 | 1.106344  | 0.000000 |
| N | -2.313454 | -0.091849 | 0.000000 |
| C | -1.443138 | -1.075273 | 0.000000 |
| H | -1.686337 | -2.128178 | 0.000000 |
| N | -0.157998 | -0.591533 | 0.000000 |

SI-174

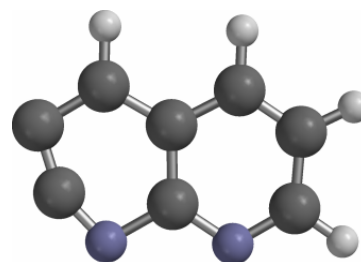

|   |           |           |          |
|---|-----------|-----------|----------|
| C | 2.179473  | -0.551313 | 0.000000 |
| C | 2.575007  | 0.678067  | 0.000000 |
| C | 1.372017  | 1.400887  | 0.000000 |
| H | 1.353123  | 2.492578  | 0.000000 |
| C | 0.114542  | 0.698772  | 0.000000 |
| C | 0.082499  | -0.745265 | 0.000000 |
| N | 1.309613  | -1.442627 | 0.000000 |
| C | -1.142812 | 1.347742  | 0.000000 |
| H | -1.182862 | 2.434363  | 0.000000 |
| C | -2.295842 | 0.592862  | 0.000000 |
| H | -3.275712 | 1.059831  | 0.000000 |
| C | -2.188685 | -0.815690 | 0.000000 |
| H | -3.089837 | -1.426983 | 0.000000 |
| N | -1.040565 | -1.476687 | 0.000000 |

SI-175

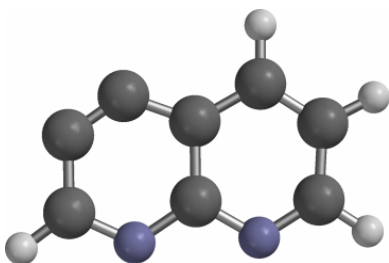

|   |           |           |          |
|---|-----------|-----------|----------|
| C | -0.135225 | -0.614459 | 0.000000 |
| C | 0.005487  | 0.849724  | 0.000000 |
| C | -1.258679 | 1.446855  | 0.000000 |
| C | -2.348442 | 0.839843  | 0.000000 |
| C | -2.477043 | -0.570158 | 0.000000 |
| H | -3.413194 | -1.120024 | 0.000000 |
| N | -1.343943 | -1.243171 | 0.000000 |
| C | 1.300047  | 1.407052  | 0.000000 |
| H | 1.418896  | 2.485980  | 0.000000 |
| C | 2.383926  | 0.557776  | 0.000000 |
| H | 3.400047  | 0.940117  | 0.000000 |
| C | 2.155276  | -0.838152 | 0.000000 |
| H | 3.006206  | -1.518665 | 0.000000 |
| N | 0.965380  | -1.408175 | 0.000000 |

SI-177

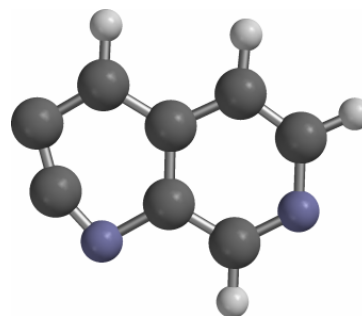

|   |           |           |          |
|---|-----------|-----------|----------|
| N | 1.339261  | 1.434591  | 0.000000 |
| C | 0.117448  | 0.722607  | 0.000000 |
| C | 0.114503  | -0.711029 | 0.000000 |
| C | 1.365686  | -1.434724 | 0.000000 |
| H | 1.338453  | -2.525315 | 0.000000 |
| C | 2.201736  | 0.531017  | 0.000000 |
| C | 2.559712  | -0.707287 | 0.000000 |
| C | -1.109823 | 1.421606  | 0.000000 |
| H | -1.095363 | 2.509936  | 0.000000 |
| N | -2.280748 | 0.812127  | 0.000000 |
| C | -2.293911 | -0.544911 | 0.000000 |
| H | -3.280189 | -1.002868 | 0.000000 |
| C | -1.159155 | -1.329640 | 0.000000 |
|   | -1.237216 | -2.413502 | 0.000000 |

SI-176

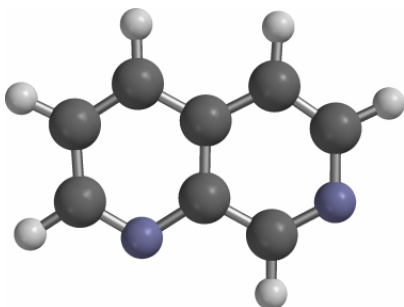

|   |           |           |          |
|---|-----------|-----------|----------|
| N | -1.175124 | -1.412317 | 0.000000 |
| C | -2.310244 | -0.744550 | 0.000000 |
| H | -3.222503 | -1.340168 | 0.000000 |
| C | -2.402088 | 0.673410  | 0.000000 |
| H | -3.379014 | 1.147830  | 0.000000 |
| C | -1.247427 | 1.418035  | 0.000000 |
| H | -1.274463 | 2.505071  | 0.000000 |
| C | 0.000989  | 0.742794  | 0.000000 |
| C | -0.023480 | -0.682445 | 0.000000 |
| C | 1.268634  | 1.376671  | 0.000000 |
| H | 1.338537  | 2.461550  | 0.000000 |
| C | 1.225360  | -1.366736 | 0.000000 |
| H | 1.210763  | -2.455733 | 0.000000 |
| N | 2.395796  | -0.763815 | 0.000000 |
| C | 2.404044  | 0.598474  | 0.000000 |
| H | 3.389750  | 1.058630  | 0.000000 |

SI-178

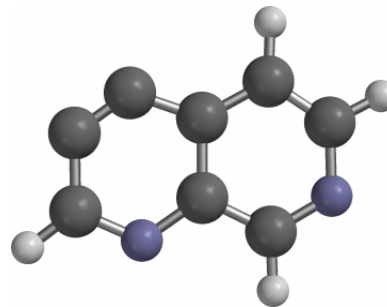

|   |           |           |          |
|---|-----------|-----------|----------|
| N | 1.359917  | -1.221453 | 0.000000 |
| C | 2.495572  | -0.544438 | 0.000000 |
| H | 3.433860  | -1.089257 | 0.000000 |
| C | 2.345574  | 0.861235  | 0.000000 |
| C | 1.255019  | 1.466392  | 0.000000 |
| C | -0.009583 | 0.862474  | 0.000000 |
| C | 0.159898  | -0.589244 | 0.000000 |
| C | -1.318187 | 1.382769  | 0.000000 |
| H | -1.481875 | 2.455198  | 0.000000 |
| C | -2.378802 | 0.500092  | 0.000000 |
| H | -3.400673 | 0.872531  | 0.000000 |
| N | -2.250990 | -0.851694 | 0.000000 |
| C | -1.035981 | -1.362409 | 0.000000 |
| H | -0.943483 | -2.446675 | 0.000000 |

SI-179

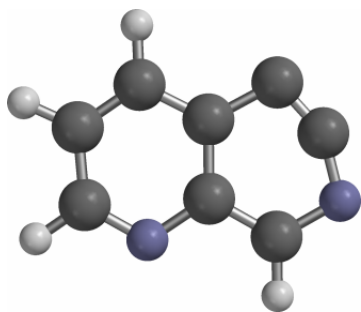

|   |           |           |          |
|---|-----------|-----------|----------|
| N | -1.008693 | -1.391635 | 0.000000 |
| C | -2.173070 | -0.776085 | 0.000000 |
| H | -3.055505 | -1.414734 | 0.000000 |
| C | -2.333533 | 0.634640  | 0.000000 |
| H | -3.334112 | 1.057552  | 0.000000 |
| C | -1.220098 | 1.442620  | 0.000000 |
| H | -1.293081 | 2.525718  | 0.000000 |
| C | 0.062907  | 0.838485  | 0.000000 |
| C | 0.110568  | -0.611355 | 0.000000 |
| C | 1.322258  | 1.551503  | 0.000000 |
| C | 2.197871  | 0.640632  | 0.000000 |
| N | 2.538707  | -0.597680 | 0.000000 |
| C | 1.375810  | -1.282466 | 0.000000 |
| H | 1.419286  | -2.366741 | 0.000000 |

SI-181

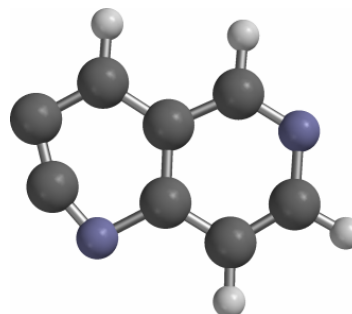

|   |           |           |          |
|---|-----------|-----------|----------|
| N | 1.336936  | -1.463848 | 0.000000 |
| C | 0.117373  | -0.750891 | 0.000000 |
| C | 0.132589  | 0.684685  | 0.000000 |
| C | 1.382621  | 1.400501  | 0.000000 |
| H | 1.361667  | 2.491415  | 0.000000 |
| C | 2.576400  | 0.667756  | 0.000000 |
| C | 2.206974  | -0.564489 | 0.000000 |
| C | -1.134321 | 1.327858  | 0.000000 |
| H | -1.172095 | 2.417467  | 0.000000 |
| N | -2.292382 | 0.696347  | 0.000000 |
| C | -2.270049 | -0.660929 | 0.000000 |
| H | -3.243992 | -1.144963 | 0.000000 |
| C | -1.117544 | -1.422550 | 0.000000 |
| H | -1.144709 | -2.506749 | 0.000000 |

SI-180

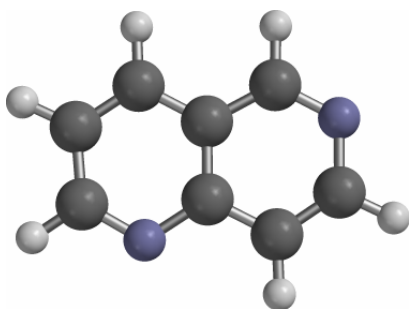

|   |           |           |          |
|---|-----------|-----------|----------|
| N | -1.171314 | -1.446884 | 0.000000 |
| C | -2.306763 | -0.776897 | 0.000000 |
| H | -3.216767 | -1.376704 | 0.000000 |
| C | -2.410319 | 0.639398  | 0.000000 |
| H | -3.389701 | 1.107932  | 0.000000 |
| C | -1.255658 | 1.384987  | 0.000000 |
| H | -1.281894 | 2.472367  | 0.000000 |
| C | -0.010139 | 0.710558  | 0.000000 |
| C | -0.017733 | -0.716075 | 0.000000 |
| C | 1.237192  | -1.374213 | 0.000000 |
| H | 1.263061  | -2.458998 | 0.000000 |
| C | 2.387727  | -0.618649 | 0.000000 |
| H | 3.363965  | -1.098290 | 0.000000 |
| N | 2.409610  | 0.744349  | 0.000000 |
| C | 1.250170  | 1.368037  | 0.000000 |
| H | 1.278605  | 2.458976  | 0.000000 |

SI-182

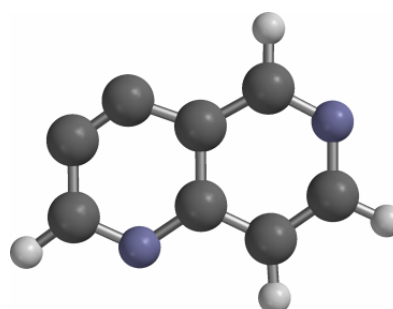

|   |           |           |          |
|---|-----------|-----------|----------|
| N | 1.352727  | -1.257358 | 0.000000 |
| C | 2.488181  | -0.577518 | 0.000000 |
| H | 3.425158  | -1.125372 | 0.000000 |
| C | 2.346559  | 0.826625  | 0.000000 |
| C | 1.258359  | 1.436726  | 0.000000 |
| C | -0.003500 | 0.830403  | 0.000000 |
| C | 0.150323  | -0.623935 | 0.000000 |
| C | -1.308058 | 1.374364  | 0.000000 |
| H | -1.432670 | 2.455927  | 0.000000 |
| N | -2.404292 | 0.639628  | 0.000000 |
| C | -2.261969 | -0.711315 | 0.000000 |
| H | -3.191493 | -1.276147 | 0.000000 |
| C | -1.052036 | -1.372940 | 0.000000 |
| H | -0.999305 | -2.456316 | 0.000000 |



SI-183

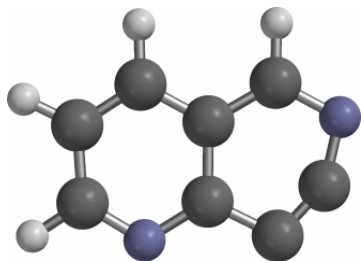

|   |           |           |          |
|---|-----------|-----------|----------|
| N | 1.170209  | -1.473559 | 0.000000 |
| C | -0.023223 | -0.830701 | 0.000000 |
| C | -0.117177 | 0.625558  | 0.000000 |
| C | 1.094334  | 1.362419  | 0.000000 |
| H | 1.067720  | 2.449708  | 0.000000 |
| C | 2.288064  | 0.681068  | 0.000000 |
| H | 3.238671  | 1.205215  | 0.000000 |
| C | 2.265419  | -0.736256 | 0.000000 |
| H | 3.208275  | -1.282916 | 0.000000 |
| C | -1.390478 | 1.269830  | 0.000000 |
| H | -1.469945 | 2.354191  | 0.000000 |
| N | -2.551379 | 0.579136  | 0.000000 |
| C | -2.194239 | -0.661915 | 0.000000 |
| C | -1.282596 | -1.527698 | 0.000000 |

SI-185

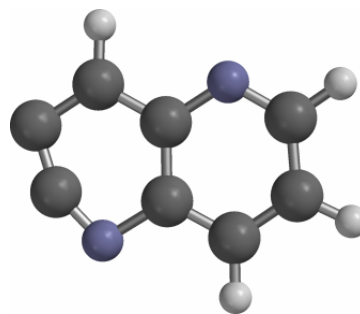

|   |           |           |          |
|---|-----------|-----------|----------|
| C | 2.201548  | -0.532924 | 0.000000 |
| C | 2.549619  | 0.704375  | 0.000000 |
| C | 1.347602  | 1.421882  | 0.000000 |
| H | 1.286634  | 2.509498  | 0.000000 |
| C | 0.104962  | 0.685789  | 0.000000 |
| C | 0.123538  | -0.755558 | 0.000000 |
| N | 1.349078  | -1.451484 | 0.000000 |
| N | -1.065300 | 1.379854  | 0.000000 |
| C | -2.192264 | 0.691896  | 0.000000 |
| H | -3.111326 | 1.276359  | 0.000000 |
| C | -2.265344 | -0.721836 | 0.000000 |
| H | -3.234067 | -1.212154 | 0.000000 |
| C | -1.098150 | -1.455020 | 0.000000 |
| H | -1.087522 | -2.540478 | 0.000000 |

SI-184

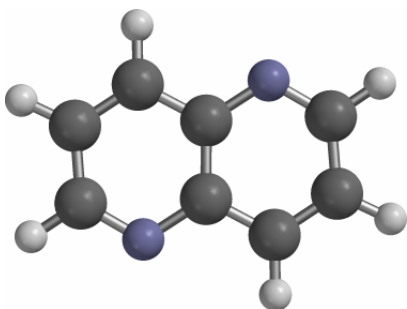

|   |           |           |          |
|---|-----------|-----------|----------|
| N | -1.183714 | -1.425847 | 0.000000 |
| C | -2.309995 | -0.740590 | 0.000000 |
| H | -3.229130 | -1.325859 | 0.000000 |
| C | -2.385144 | 0.676573  | 0.000000 |
| H | -3.355940 | 1.163540  | 0.000000 |
| C | -1.219162 | 1.404807  | 0.000000 |
| H | -1.206125 | 2.490659  | 0.000000 |
| C | 0.019659  | 0.714465  | 0.000000 |
| C | -0.019659 | -0.714465 | 0.000000 |
| N | 1.183714  | 1.425847  | 0.000000 |
| C | 2.309995  | 0.740590  | 0.000000 |
| H | 3.229130  | 1.325859  | 0.000000 |
| C | 2.385144  | -0.676573 | 0.000000 |
| H | 3.355940  | -1.163540 | 0.000000 |
| C | 1.219162  | -1.404807 | 0.000000 |
| H | 1.206125  | -2.490659 | 0.000000 |

SI-186

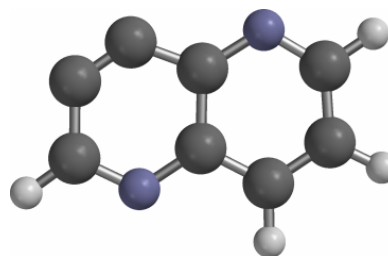

|   |           |           |          |
|---|-----------|-----------|----------|
| C | 2.315177  | 0.648367  | 0.000000 |
| H | 3.280815  | 1.151720  | 0.000000 |
| C | 2.261448  | -0.764080 | 0.000000 |
| H | 3.183604  | -1.337287 | 0.000000 |
| C | 1.035665  | -1.391907 | 0.000000 |
| H | 0.941848  | -2.473065 | 0.000000 |
| C | -0.147979 | -0.612430 | 0.000000 |
| C | 0.041168  | 0.846229  | 0.000000 |
| N | 1.250912  | 1.432921  | 0.000000 |
| N | -1.355781 | -1.233148 | 0.000000 |
| C | -2.482086 | -0.539625 | 0.000000 |
| H | -3.426552 | -1.073884 | 0.000000 |
| C | -2.315998 | 0.861270  | 0.000000 |
| C | -1.222946 | 1.463237  | 0.000000 |

SI-187

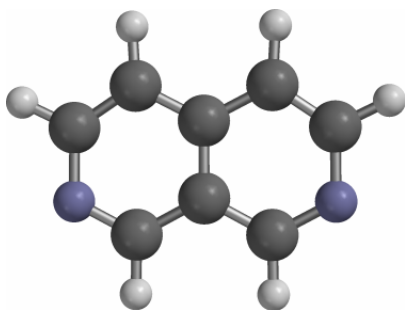

|   |           |          |           |
|---|-----------|----------|-----------|
| C | 1.251535  | 0.000000 | 1.354816  |
| H | 1.270763  | 0.000000 | 2.445554  |
| N | 2.416952  | 0.000000 | 0.741446  |
| C | 2.404200  | 0.000000 | -0.621829 |
| H | 3.384291  | 0.000000 | -1.093889 |
| C | 1.260950  | 0.000000 | -1.388819 |
| H | 1.320878  | 0.000000 | -2.473699 |
| C | 0.000000  | 0.000000 | -0.740290 |
| C | 0.000000  | 0.000000 | 0.683241  |
| C | -1.251535 | 0.000000 | 1.354816  |
| H | -1.270763 | 0.000000 | 2.445554  |
| N | -2.416952 | 0.000000 | 0.741446  |
| C | -2.404200 | 0.000000 | -0.621829 |
| H | -3.384291 | 0.000000 | -1.093889 |
| C | -1.260950 | 0.000000 | -1.388819 |
| H | -1.320878 | 0.000000 | -2.473699 |

SI-189

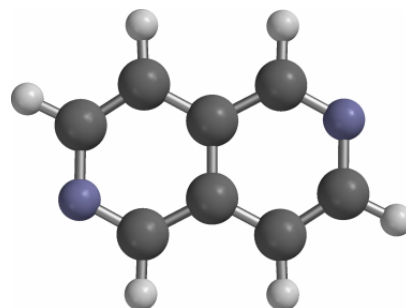

|   |           |           |          |
|---|-----------|-----------|----------|
| C | 1.248628  | -1.381357 | 0.000000 |
| H | 1.270291  | -2.471874 | 0.000000 |
| N | 2.411206  | -0.764291 | 0.000000 |
| C | 2.408706  | 0.598805  | 0.000000 |
| H | 3.390597  | 1.066165  | 0.000000 |
| C | 1.264399  | 1.363379  | 0.000000 |
| H | 1.319952  | 2.448765  | 0.000000 |
| C | 0.007366  | 0.711146  | 0.000000 |
| C | -0.007366 | -0.711146 | 0.000000 |
| C | -1.248628 | 1.381357  | 0.000000 |
| H | -1.270291 | 2.471874  | 0.000000 |
| N | -2.411206 | 0.764291  | 0.000000 |
| C | -2.408706 | -0.598805 | 0.000000 |
| H | -3.390597 | -1.066165 | 0.000000 |
| C | -1.264399 | -1.363379 | 0.000000 |
| H | -1.319952 | -2.448765 | 0.000000 |

SI-188

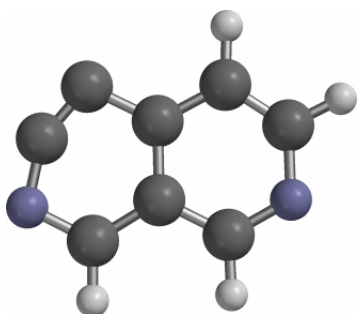

|   |           |           |          |
|---|-----------|-----------|----------|
| C | 1.086644  | -1.342577 | 0.000000 |
| H | 1.058379  | -2.432924 | 0.000000 |
| N | 2.278091  | -0.784126 | 0.000000 |
| C | 2.335033  | 0.576785  | 0.000000 |
| H | 3.338580  | 0.996847  | 0.000000 |
| C | 1.234938  | 1.408044  | 0.000000 |
| H | 1.343827  | 2.487248  | 0.000000 |
| C | -0.057792 | 0.834470  | 0.000000 |
| C | -0.135287 | -0.613439 | 0.000000 |
| C | -1.401921 | -1.266921 | 0.000000 |
| H | -1.485033 | -2.350510 | 0.000000 |
| N | -2.558700 | -0.567760 | 0.000000 |
| C | -2.203973 | 0.668314  | 0.000000 |
| C | -1.311068 | 1.559767  | 0.000000 |

SI-190

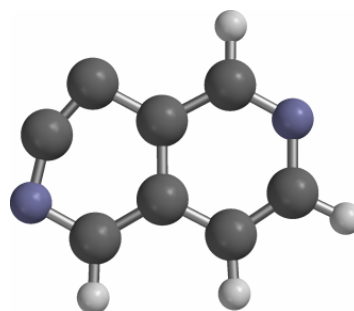

|   |           |           |          |
|---|-----------|-----------|----------|
| C | 1.392920  | 1.298124  | 0.000000 |
| H | 1.480944  | 2.380967  | 0.000000 |
| N | 2.543613  | 0.590181  | 0.000000 |
| C | 2.195263  | -0.643414 | 0.000000 |
| C | 1.306722  | -1.544297 | 0.000000 |
| C | 0.062526  | -0.801974 | 0.000000 |
| C | 0.122766  | 0.644159  | 0.000000 |
| C | -1.106919 | 1.351918  | 0.000000 |
| H | -1.117712 | 2.438714  | 0.000000 |
| C | -2.284563 | 0.640064  | 0.000000 |
| H | -3.241768 | 1.156121  | 0.000000 |
| N | -2.354375 | -0.719542 | 0.000000 |
| C | -1.228248 | -1.402142 | 0.000000 |
| H | -1.294360 | -2.488845 | 0.000000 |

SI-191

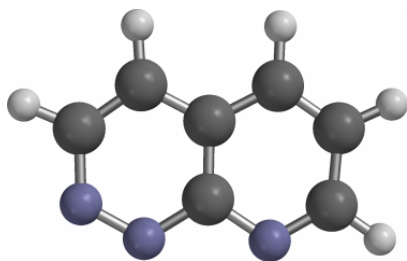

|   |           |           |          |
|---|-----------|-----------|----------|
| C | -0.024519 | -0.672748 | 0.000000 |
| N | -1.203003 | -1.367333 | 0.000000 |
| N | -2.336803 | -0.721664 | 0.000000 |
| C | -2.354504 | 0.641549  | 0.000000 |
| H | -3.349288 | 1.076989  | 0.000000 |
| C | -1.219570 | 1.418875  | 0.000000 |
| H | -1.273495 | 2.505011  | 0.000000 |
| C | 0.021184  | 0.752292  | 0.000000 |
| C | 1.293780  | 1.382753  | 0.000000 |
| H | 1.359099  | 2.468239  | 0.000000 |
| C | 2.414053  | 0.592276  | 0.000000 |
| H | 3.411374  | 1.021606  | 0.000000 |
| C | 2.255856  | -0.823313 | 0.000000 |
| H | 3.142954  | -1.456141 | 0.000000 |
| N | 1.098506  | -1.445395 | 0.000000 |

SI-193

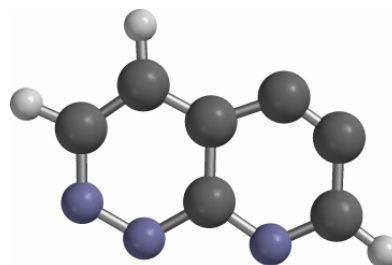

|   |           |           |          |
|---|-----------|-----------|----------|
| N | 2.161543  | 0.902226  | 0.000000 |
| N | 0.956668  | 1.403049  | 0.000000 |
| C | 2.353641  | -0.442378 | 0.000000 |
| H | 3.395681  | -0.747926 | 0.000000 |
| C | 1.329566  | -1.366535 | 0.000000 |
| H | 1.523809  | -2.434012 | 0.000000 |
| C | 0.020899  | -0.868750 | 0.000000 |
| C | -0.136641 | 0.585932  | 0.000000 |
| N | -1.344828 | 1.211913  | 0.000000 |
| C | -2.470654 | 0.531983  | 0.000000 |
| H | -3.411266 | 1.073583  | 0.000000 |
| C | -1.238198 | -1.481241 | 0.000000 |
| C | -2.331890 | -0.882233 | 0.000000 |

SI-192

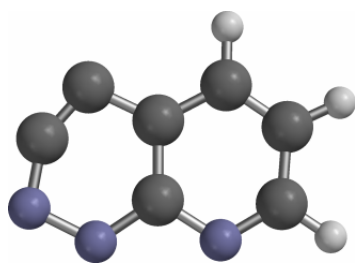

|   |           |           |          |
|---|-----------|-----------|----------|
| N | 2.486148  | 0.674446  | 0.000000 |
| N | 1.301175  | 1.331486  | 0.000000 |
| C | 2.204103  | -0.586833 | 0.000000 |
| C | 1.326699  | -1.497657 | 0.000000 |
| C | 0.063375  | -0.838125 | 0.000000 |
| C | -1.220330 | -1.443621 | 0.000000 |
| H | -1.295138 | -2.526422 | 0.000000 |
| C | 0.133740  | 0.619276  | 0.000000 |
| C | -2.324820 | -0.630018 | 0.000000 |
| H | -3.329657 | -1.041909 | 0.000000 |
| N | -0.987812 | 1.398836  | 0.000000 |
| C | -2.147974 | 0.784063  | 0.000000 |
| H | -3.028003 | 1.426459  | 0.000000 |

SI-194

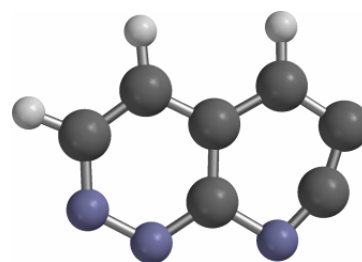

|   |           |           |          |
|---|-----------|-----------|----------|
| N | 2.212354  | 0.873751  | 0.000000 |
| N | 1.043145  | 1.473533  | 0.000000 |
| C | 2.283430  | -0.479614 | 0.000000 |
| H | 3.294781  | -0.875015 | 0.000000 |
| C | 1.180703  | -1.311977 | 0.000000 |
| H | 1.290689  | -2.393319 | 0.000000 |
| C | -0.091876 | -0.715908 | 0.000000 |
| C | -1.345008 | -1.435957 | 0.000000 |
| H | -1.318827 | -2.526832 | 0.000000 |
| C | -0.074364 | 0.722690  | 0.000000 |
| C | -2.539065 | -0.709523 | 0.000000 |
| N | -1.300775 | 1.426121  | 0.000000 |
| C | -2.160509 | 0.527176  | 0.000000 |

SI-195

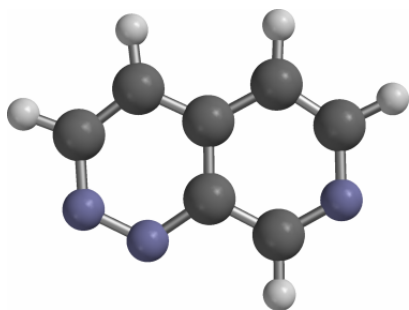

|   |           |           |          |
|---|-----------|-----------|----------|
| C | -0.034555 | -0.660050 | 0.000000 |
| N | -1.188349 | -1.387747 | 0.000000 |
| N | -2.339388 | -0.772589 | 0.000000 |
| C | -2.376351 | 0.592813  | 0.000000 |
| H | -3.379661 | 1.008653  | 0.000000 |
| C | -1.260783 | 1.398736  | 0.000000 |
| H | -1.344642 | 2.482359  | 0.000000 |
| C | -0.002809 | 0.760317  | 0.000000 |
| C | 1.268111  | 1.388631  | 0.000000 |
| H | 1.347766  | 2.472291  | 0.000000 |
| C | 2.392472  | 0.597107  | 0.000000 |
| H | 3.382734  | 1.046798  | 0.000000 |
| N | 2.376083  | -0.769228 | 0.000000 |
| C | 1.204485  | -1.364399 | 0.000000 |
| H | 1.177825  | -2.452758 | 0.000000 |

SI-197

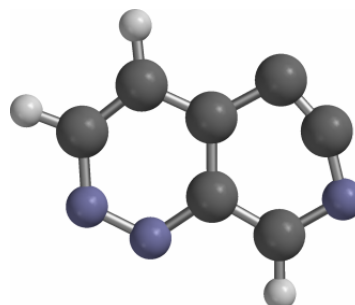

|   |           |           |          |
|---|-----------|-----------|----------|
| N | -0.996713 | -1.384415 | 0.000000 |
| N | -2.180779 | -0.838646 | 0.000000 |
| C | -2.303449 | 0.520511  | 0.000000 |
| H | -3.331609 | 0.871119  | 0.000000 |
| C | -1.244149 | 1.402677  | 0.000000 |
| H | -1.391256 | 2.477864  | 0.000000 |
| C | 0.053305  | 0.855062  | 0.000000 |
| C | 0.113426  | -0.589149 | 0.000000 |
| C | 1.380322  | -1.261232 | 0.000000 |
| H | 1.428495  | -2.345298 | 0.000000 |
| C | 1.307959  | 1.577803  | 0.000000 |
| C | 2.187194  | 0.672322  | 0.000000 |
| N | 2.533650  | -0.567812 | 0.000000 |

SI-196

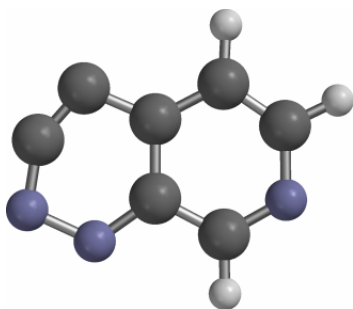

|   |           |           |          |
|---|-----------|-----------|----------|
| N | 2.506239  | 0.651682  | 0.000000 |
| N | 1.317201  | 1.306824  | 0.000000 |
| C | 2.221128  | -0.614443 | 0.000000 |
| C | 1.323966  | -1.501649 | 0.000000 |
| C | 0.055520  | -0.849445 | 0.000000 |
| C | 0.158798  | 0.600700  | 0.000000 |
| C | -1.240482 | -1.415520 | 0.000000 |
| H | -1.363717 | -2.493101 | 0.000000 |
| C | -2.325775 | -0.568471 | 0.000000 |
| H | -3.335526 | -0.972062 | 0.000000 |
| C | -1.061241 | 1.351000  | 0.000000 |
| H | -1.002451 | 2.437447  | 0.000000 |
| N | -2.249381 | 0.795366  | 0.000000 |

SI-198

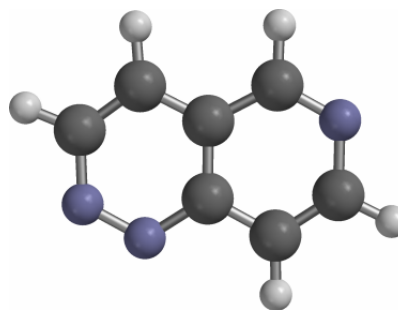

|   |           |           |          |
|---|-----------|-----------|----------|
| C | -0.019789 | -0.691909 | 0.000000 |
| N | -1.169496 | -1.435825 | 0.000000 |
| N | -2.325329 | -0.830735 | 0.000000 |
| C | -2.390879 | 0.532264  | 0.000000 |
| H | -3.401335 | 0.929825  | 0.000000 |
| C | -1.284902 | 1.352673  | 0.000000 |
| H | -1.379808 | 2.435683  | 0.000000 |
| C | -0.023381 | 0.729108  | 0.000000 |
| C | 1.235296  | 1.396790  | 0.000000 |
| H | 1.261159  | 2.487232  | 0.000000 |
| C | 1.232854  | -1.355812 | 0.000000 |
| H | 1.257027  | -2.440506 | 0.000000 |
| N | 2.390484  | 0.770842  | 0.000000 |
| C | 2.378261  | -0.595825 | 0.000000 |
| H | 3.358080  | -1.066666 | 0.000000 |

SI-199

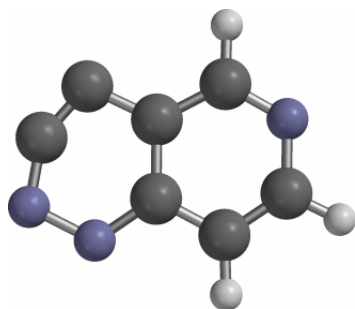

|   |           |           |          |
|---|-----------|-----------|----------|
| N | 2.495582  | 0.672495  | 0.000000 |
| N | 1.312485  | 1.344372  | 0.000000 |
| C | 2.210597  | -0.584601 | 0.000000 |
| C | 1.323921  | -1.489449 | 0.000000 |
| C | 0.066455  | -0.816034 | 0.000000 |
| C | 0.149985  | 0.634237  | 0.000000 |
| C | -1.228790 | -1.409484 | 0.000000 |
| H | -1.308559 | -2.495291 | 0.000000 |
| C | -1.074512 | 1.358703  | 0.000000 |
| H | -1.054277 | 2.443098  | 0.000000 |
| C | -2.252936 | 0.653192  | 0.000000 |
| H | -3.205689 | 1.176647  | 0.000000 |
| N | -2.340997 | -0.710355 | 0.000000 |

SI-201

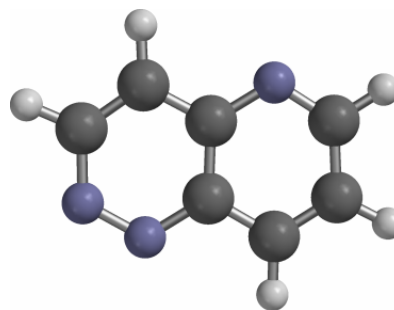

|   |           |           |          |
|---|-----------|-----------|----------|
| C | -0.016404 | -0.694773 | 0.000000 |
| N | -1.170384 | -1.425694 | 0.000000 |
| N | -2.323251 | -0.812390 | 0.000000 |
| C | -2.368361 | 0.550722  | 0.000000 |
| H | -3.373494 | 0.962339  | 0.000000 |
| C | -1.254682 | 1.361211  | 0.000000 |
| H | -1.319054 | 2.444843  | 0.000000 |
| C | 0.003722  | 0.729107  | 0.000000 |
| C | 1.224844  | -1.383640 | 0.000000 |
| H | 1.217023  | -2.469431 | 0.000000 |
| C | 2.379690  | -0.642447 | 0.000000 |
| H | 3.357436  | -1.114483 | 0.000000 |
| N | 1.158724  | 1.457894  | 0.000000 |
| C | 2.287147  | 0.778301  | 0.000000 |
| H | 3.202210  | 1.369767  | 0.000000 |

SI-200

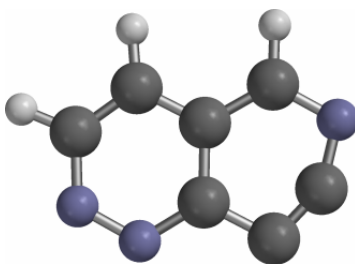

|   |           |           |          |
|---|-----------|-----------|----------|
| N | 2.295003  | 0.776205  | 0.000000 |
| N | 1.180611  | 1.460557  | 0.000000 |
| C | 2.276251  | -0.585658 | 0.000000 |
| H | 3.259957  | -1.045381 | 0.000000 |
| C | 1.124240  | -1.339602 | 0.000000 |
| H | 1.160652  | -2.426287 | 0.000000 |
| C | -0.101228 | -0.645307 | 0.000000 |
| C | -0.014860 | 0.803190  | 0.000000 |
| C | -1.264120 | 1.520707  | 0.000000 |
| C | -2.170585 | 0.647943  | 0.000000 |
| C | -1.376379 | -1.295069 | 0.000000 |
| H | -1.460378 | -2.378810 | 0.000000 |
| N | -2.525818 | -0.592623 | 0.000000 |

SI-202

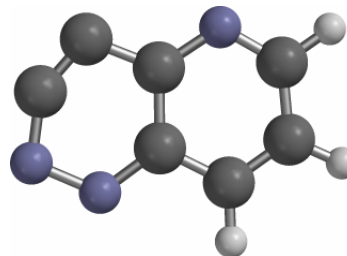

|   |           |           |          |
|---|-----------|-----------|----------|
| N | 2.496477  | 0.645761  | 0.000000 |
| N | 1.312844  | 1.305287  | 0.000000 |
| C | 2.204561  | -0.623668 | 0.000000 |
| C | 1.286648  | -1.486662 | 0.000000 |
| C | 0.019176  | -0.844602 | 0.000000 |
| C | 0.143446  | 0.615023  | 0.000000 |
| N | -1.177959 | -1.473343 | 0.000000 |
| C | -2.259126 | -0.719221 | 0.000000 |
| H | -3.211418 | -1.248319 | 0.000000 |
| C | -2.257261 | 0.703297  | 0.000000 |
| H | -3.201931 | 1.238126  | 0.000000 |
| C | -1.061522 | 1.374147  | 0.000000 |
| H | -0.998090 | 2.457477  | 0.000000 |

SI-203

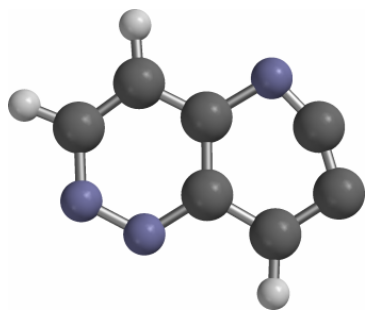

|   |           |           |          |
|---|-----------|-----------|----------|
| N | 2.204295  | 0.751924  | 0.000000 |
| N | 1.053457  | 1.375117  | 0.000000 |
| C | 2.241861  | -0.606172 | 0.000000 |
| H | 3.243158  | -1.026795 | 0.000000 |
| C | 1.123405  | -1.417985 | 0.000000 |
| H | 1.186753  | -2.501141 | 0.000000 |
| C | -0.115902 | -0.771743 | 0.000000 |
| C | -0.109707 | 0.665174  | 0.000000 |
| N | -1.333151 | -1.485203 | 0.000000 |
| C | -2.192130 | -0.571120 | 0.000000 |
| C | -2.539909 | 0.666021  | 0.000000 |
| C | -1.353926 | 1.402302  | 0.000000 |
| H | -1.300528 | 2.489860  | 0.000000 |

SI-205

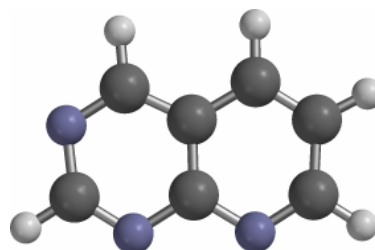

|   |           |           |          |
|---|-----------|-----------|----------|
| C | -0.017092 | -0.712585 | 0.000000 |
| N | -1.197838 | -1.389985 | 0.000000 |
| C | 0.001694  | 0.713949  | 0.000000 |
| C | -2.292773 | -0.661773 | 0.000000 |
| H | -3.239022 | -1.199455 | 0.000000 |
| C | 1.250465  | 1.380447  | 0.000000 |
| H | 1.286304  | 2.467615  | 0.000000 |
| C | -1.260598 | 1.358996  | 0.000000 |
| H | -1.314421 | 2.449164  | 0.000000 |
| N | -2.399020 | 0.698800  | 0.000000 |
| N | 1.124088  | -1.453751 | 0.000000 |
| C | 2.266644  | -0.795785 | 0.000000 |
| H | 3.168738  | -1.407566 | 0.000000 |
| C | 2.394103  | 0.619371  | 0.000000 |
| H | 3.380586  | 1.072362  | 0.000000 |

SI-204

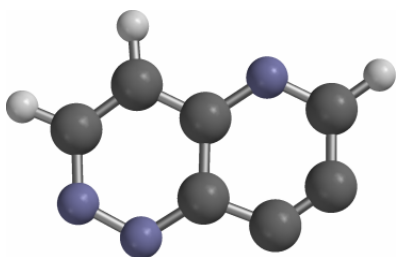

|   |           |           |          |
|---|-----------|-----------|----------|
| N | 2.347546  | 0.683387  | 0.000000 |
| N | 1.258874  | 1.414255  | 0.000000 |
| C | 0.049692  | 0.818158  | 0.000000 |
| C | -0.135170 | -0.634536 | 0.000000 |
| C | 1.062930  | -1.371591 | 0.000000 |
| H | 1.033438  | -2.456247 | 0.000000 |
| C | 2.252516  | -0.670878 | 0.000000 |
| H | 3.209187  | -1.184939 | 0.000000 |
| N | -1.342320 | -1.259506 | 0.000000 |
| C | -2.464461 | -0.561298 | 0.000000 |
| H | -3.410383 | -1.093270 | 0.000000 |
| C | -2.300187 | 0.842812  | 0.000000 |
| C | -1.209316 | 1.445610  | 0.000000 |

SI-206

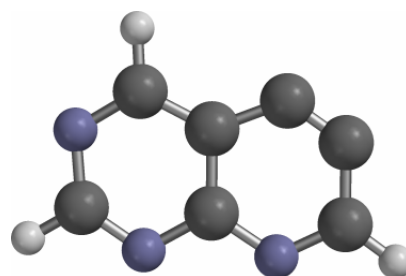

|   |           |           |          |
|---|-----------|-----------|----------|
| C | 2.163743  | 0.745703  | 0.000000 |
| H | 3.056926  | 1.367009  | 0.000000 |
| N | 2.388204  | -0.594655 | 0.000000 |
| C | 1.315249  | -1.362554 | 0.000000 |
| H | 1.464841  | -2.441079 | 0.000000 |
| C | 0.008053  | -0.831614 | 0.000000 |
| C | -1.253530 | -1.433475 | 0.000000 |
| C | -2.333631 | -0.808817 | 0.000000 |
| C | -0.116528 | 0.625140  | 0.000000 |
| N | 1.009416  | 1.381276  | 0.000000 |
| N | -1.314606 | 1.269587  | 0.000000 |
| C | -2.452457 | 0.600975  | 0.000000 |
| H | -3.384863 | 1.157110  | 0.000000 |

SI-207

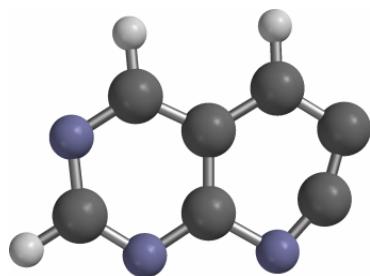

|   |           |           |          |
|---|-----------|-----------|----------|
| C | 2.161203  | -0.593089 | 0.000000 |
| C | 2.562147  | 0.632208  | 0.000000 |
| C | 1.378074  | 1.383165  | 0.000000 |
| H | 1.376121  | 2.474401  | 0.000000 |
| C | 0.119734  | 0.687278  | 0.000000 |
| N | 1.276290  | -1.474161 | 0.000000 |
| C | 0.067562  | -0.750289 | 0.000000 |
| N | -1.084672 | -1.434743 | 0.000000 |
| C | -2.188186 | -0.704516 | 0.000000 |
| H | -3.130292 | -1.247803 | 0.000000 |
| N | -2.287055 | 0.647624  | 0.000000 |
| C | -1.148460 | 1.316868  | 0.000000 |
| H | -1.213797 | 2.405227  | 0.000000 |

SI-209

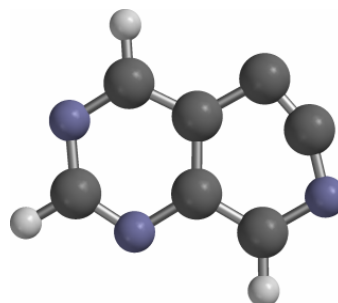

|   |           |           |          |
|---|-----------|-----------|----------|
| N | 2.334215  | -0.670705 | 0.000000 |
| C | 2.177901  | 0.684366  | 0.000000 |
| H | 3.101096  | 1.259516  | 0.000000 |
| N | 1.053457  | 1.365555  | 0.000000 |
| C | 1.236291  | -1.396571 | 0.000000 |
| H | 1.336557  | -2.481122 | 0.000000 |
| C | -0.092334 | 0.626133  | 0.000000 |
| C | -0.062322 | -0.815897 | 0.000000 |
| C | -1.309599 | -1.550298 | 0.000000 |
| C | -2.175289 | -0.624176 | 0.000000 |
| N | -2.506667 | 0.612562  | 0.000000 |
| C | -1.350822 | 1.308740  | 0.000000 |
| H | -1.400269 | 2.392482  | 0.000000 |

SI-208

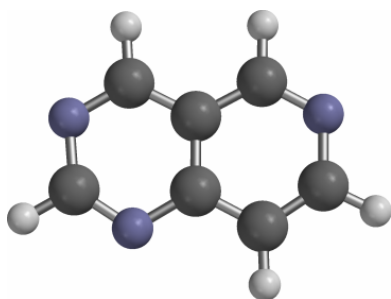

|   |           |           |          |
|---|-----------|-----------|----------|
| C | -0.045606 | -0.719113 | 0.000000 |
| N | -1.237024 | -1.385815 | 0.000000 |
| C | 0.001391  | 0.701461  | 0.000000 |
| C | 1.187586  | -1.413930 | 0.000000 |
| H | 1.190055  | -2.498795 | 0.000000 |
| C | 2.353816  | -0.680583 | 0.000000 |
| H | 3.318626  | -1.182664 | 0.000000 |
| C | -2.317269 | -0.634608 | 0.000000 |
| H | -3.274228 | -1.152861 | 0.000000 |
| C | 1.269786  | 1.337826  | 0.000000 |
| H | 1.324738  | 2.427297  | 0.000000 |
| N | 2.412001  | 0.682437  | 0.000000 |
| C | -1.246590 | 1.371134  | 0.000000 |
| H | -1.284640 | 2.461585  | 0.000000 |
| N | -2.396275 | 0.728194  | 0.000000 |

SI-210

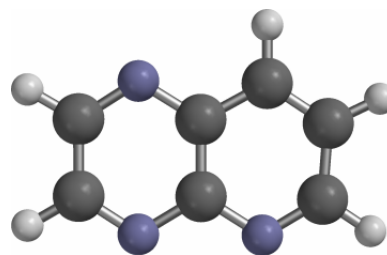

|   |           |           |          |
|---|-----------|-----------|----------|
| C | -0.021495 | -0.716949 | 0.000000 |
| N | -1.184641 | -1.428949 | 0.000000 |
| C | -0.012986 | 0.713333  | 0.000000 |
| C | 1.222100  | -1.396537 | 0.000000 |
| H | 1.221279  | -2.482548 | 0.000000 |
| C | 2.375607  | -0.650280 | 0.000000 |
| H | 3.355078  | -1.119017 | 0.000000 |
| N | 1.137843  | 1.437390  | 0.000000 |
| C | 2.272602  | 0.766666  | 0.000000 |
| H | 3.182701  | 1.366021  | 0.000000 |
| N | -1.180922 | 1.415887  | 0.000000 |
| C | -2.286760 | 0.703834  | 0.000000 |
| H | -3.230504 | 1.248488  | 0.000000 |
| C | -2.292256 | -0.718971 | 0.000000 |
| H | -3.236263 | -1.261872 | 0.000000 |

SI-211

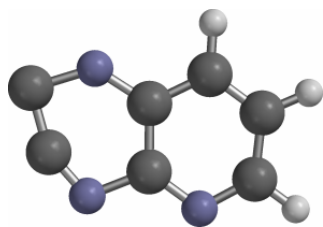

|   |           |           |          |
|---|-----------|-----------|----------|
| C | 2.170855  | -0.527587 | 0.000000 |
| C | 2.645453  | 0.785236  | 0.000000 |
| N | 1.292574  | -1.382832 | 0.000000 |
| N | 1.343933  | 1.302188  | 0.000000 |
| C | 0.140835  | 0.659850  | 0.000000 |
| C | -1.080953 | 1.373006  | 0.000000 |
| H | -1.062521 | 2.457804  | 0.000000 |
| C | 0.034427  | -0.774946 | 0.000000 |
| N | -1.094518 | -1.475546 | 0.000000 |
| C | -2.215485 | -0.763258 | 0.000000 |
| H | -3.142843 | -1.332115 | 0.000000 |
| C | -2.257207 | 0.650291  | 0.000000 |
| H | -3.218827 | 1.153721  | 0.000000 |

SI-213

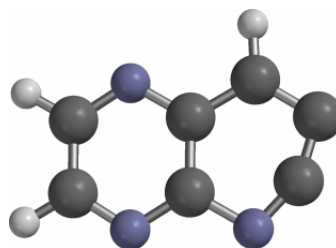

|   |           |           |          |
|---|-----------|-----------|----------|
| C | 2.175521  | 0.773334  | 0.000000 |
| H | 3.109445  | 1.332475  | 0.000000 |
| C | 2.191217  | -0.643674 | 0.000000 |
| H | 3.138890  | -1.178978 | 0.000000 |
| N | 1.088175  | -1.367296 | 0.000000 |
| N | 1.055269  | 1.475130  | 0.000000 |
| C | -0.080220 | 0.759395  | 0.000000 |
| C | -0.087692 | -0.686024 | 0.000000 |
| N | -1.300791 | 1.456093  | 0.000000 |
| C | -1.332839 | -1.411603 | 0.000000 |
| H | -1.282850 | -2.499959 | 0.000000 |
| C | -2.531789 | -0.685885 | 0.000000 |
| C | -2.159074 | 0.547342  | 0.000000 |

SI-212

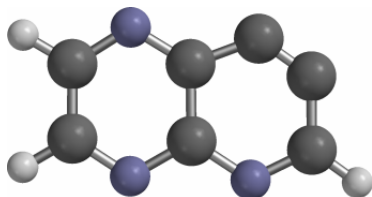

|   |           |           |          |
|---|-----------|-----------|----------|
| C | 2.155625  | 0.806089  | 0.000000 |
| H | 3.037029  | 1.445615  | 0.000000 |
| C | 2.303102  | -0.602695 | 0.000000 |
| H | 3.294173  | -1.052523 | 0.000000 |
| N | 0.982187  | 1.406139  | 0.000000 |
| N | 1.266957  | -1.419361 | 0.000000 |
| C | 0.050567  | -0.845925 | 0.000000 |
| C | -1.207974 | -1.469397 | 0.000000 |
| C | -0.120453 | 0.616594  | 0.000000 |
| N | -1.330190 | 1.237726  | 0.000000 |
| C | -2.452284 | 0.546114  | 0.000000 |
| H | -3.397186 | 1.080163  | 0.000000 |
| C | -2.296995 | -0.860194 | 0.000000 |

SI-214

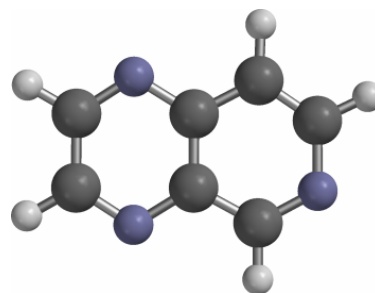

|   |           |           |          |
|---|-----------|-----------|----------|
| C | -0.029290 | -0.729889 | 0.000000 |
| N | -1.193756 | -1.445635 | 0.000000 |
| C | -0.039366 | 0.693574  | 0.000000 |
| C | 1.227256  | -1.380587 | 0.000000 |
| H | 1.265455  | -2.465184 | 0.000000 |
| C | 2.367931  | -0.608480 | 0.000000 |
| H | 3.350030  | -1.075685 | 0.000000 |
| N | -1.201696 | 1.404907  | 0.000000 |
| C | -2.306751 | 0.691454  | 0.000000 |
| H | -3.253072 | 1.230127  | 0.000000 |
| C | -2.299778 | -0.733673 | 0.000000 |
| H | -3.243125 | -1.278434 | 0.000000 |
| C | 1.210692  | 1.372382  | 0.000000 |
| H | 1.206927  | 2.461555  | 0.000000 |
| N | 2.373376  | 0.754944  | 0.000000 |



## SI-215

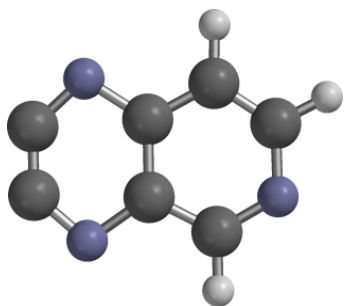

|   |           |           |          |
|---|-----------|-----------|----------|
| N | 1.329486  | 1.479770  | 0.000000 |
| C | 0.157648  | 0.705792  | 0.000000 |
| C | 0.146264  | -0.735339 | 0.000000 |
| N | 1.320199  | -1.516343 | 0.000000 |
| C | 2.293298  | -0.651336 | 0.000000 |
| C | 2.300133  | 0.610349  | 0.000000 |
| C | -1.093356 | 1.376907  | 0.000000 |
| H | -1.090188 | 2.465317  | 0.000000 |
| N | -2.255566 | 0.755830  | 0.000000 |
| C | -2.252367 | -0.601886 | 0.000000 |
| H | -3.232648 | -1.072344 | 0.000000 |
| C | -1.110371 | -1.376065 | 0.000000 |
| H | -1.151529 | -2.460194 | 0.000000 |

## SI-216

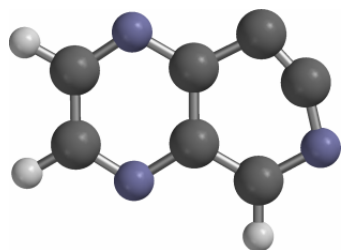

|   |           |           |          |
|---|-----------|-----------|----------|
| C | 2.146228  | 0.818774  | 0.000000 |
| H | 3.036724  | 1.445220  | 0.000000 |
| C | 2.274599  | -0.599302 | 0.000000 |
| H | 3.266628  | -1.049871 | 0.000000 |
| N | 1.243354  | -1.417859 | 0.000000 |
| N | 0.979278  | 1.425126  | 0.000000 |
| C | 0.014640  | -0.835883 | 0.000000 |
| C | -0.114569 | 0.612094  | 0.000000 |
| C | -1.214866 | -1.579020 | 0.000000 |
| C | -2.144229 | -0.729829 | 0.000000 |
| N | -2.541638 | 0.498242  | 0.000000 |
| C | -1.407306 | 1.227228  | 0.000000 |
| H | -1.494904 | 2.309140  | 0.000000 |

**B. Calculations using MP2/6-311+G\*\*****SI-3a\***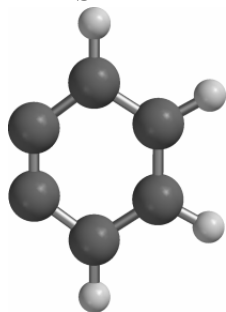

|   |           |          |           |
|---|-----------|----------|-----------|
| C | 0.634257  | 0.000000 | 1.247993  |
| C | -0.706963 | 0.000000 | -1.056667 |
| C | -0.634257 | 0.000000 | 1.247993  |
| C | 1.468416  | 0.000000 | 0.131772  |
| C | 0.706963  | 0.000000 | -1.056667 |
| C | -1.468416 | 0.000000 | 0.131772  |
| H | 2.553435  | 0.000000 | 0.128042  |
| H | 1.231954  | 0.000000 | -2.009581 |
| H | -2.553435 | 0.000000 | 0.128042  |
| H | -1.231954 | 0.000000 | -2.009581 |

**SI-7a\***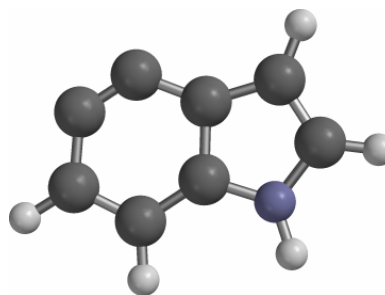

|   |           |           |          |
|---|-----------|-----------|----------|
| C | -0.998970 | -1.468926 | 0.000000 |
| C | -1.120255 | 1.248397  | 0.000000 |
| C | 0.268216  | -0.870681 | 0.000000 |
| C | -2.109773 | -0.863235 | 0.000000 |
| C | -2.324986 | 0.529152  | 0.000000 |
| C | 0.122092  | 0.566976  | 0.000000 |
| H | -3.287581 | 1.029231  | 0.000000 |
| H | -1.147794 | 2.336334  | 0.000000 |
| C | 1.660019  | -1.167335 | 0.000000 |
| H | 2.126117  | -2.142306 | 0.000000 |
| C | 2.320116  | 0.049947  | 0.000000 |
| H | 3.380665  | 0.262865  | 0.000000 |
| N | 1.402640  | 1.076605  | 0.000000 |
| H | 1.639316  | 2.057774  | 0.000000 |

**SI-5a\***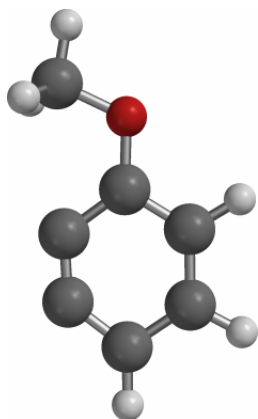

|   |           |           |           |
|---|-----------|-----------|-----------|
| H | -0.284472 | -2.258071 | 0.000000  |
| C | -0.553949 | -1.204844 | 0.000000  |
| C | -1.210450 | 1.350307  | 0.000000  |
| C | 0.496125  | -0.256918 | 0.000000  |
| C | -1.908005 | -0.821473 | 0.000000  |
| C | -2.329068 | 0.530242  | 0.000000  |
| C | 0.025548  | 1.060671  | 0.000000  |
| H | -2.668274 | -1.600470 | 0.000000  |
| H | -3.371352 | 0.825689  | 0.000000  |
| O | 1.779337  | -0.670397 | 0.000000  |
| C | 2.731075  | 0.392597  | 0.000000  |
| H | 2.611454  | 1.013247  | -0.893920 |
| H | 3.711280  | -0.082381 | 0.000000  |
| H | 2.611454  | 1.013247  | 0.893920  |

**SI-8a\***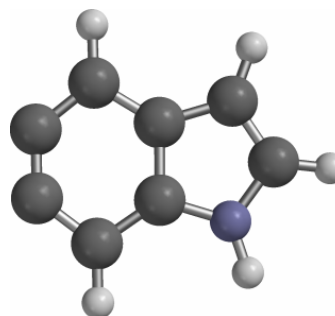

|   |           |           |          |
|---|-----------|-----------|----------|
| H | -1.145698 | -2.575522 | 0.000000 |
| C | -1.109618 | -1.490287 | 0.000000 |
| C | -1.044877 | 1.494882  | 0.000000 |
| C | 0.113510  | -0.761398 | 0.000000 |
| C | -2.181159 | -0.610622 | 0.000000 |
| C | -2.150910 | 0.662040  | 0.000000 |
| C | 0.120641  | 0.686439  | 0.000000 |
| H | -1.023866 | 2.580917  | 0.000000 |
| C | 1.488321  | -1.177700 | 0.000000 |
| H | 1.861004  | -2.192830 | 0.000000 |
| C | 2.261782  | -0.037237 | 0.000000 |
| H | 3.338493  | 0.072829  | 0.000000 |
| N | 1.444741  | 1.075153  | 0.000000 |
| H | 1.767260  | 2.030818  | 0.000000 |

SI-9a\*

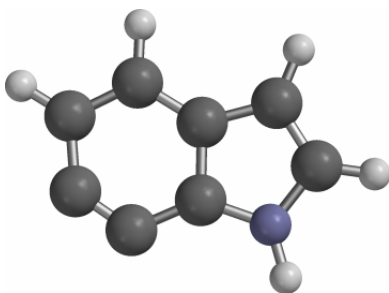

|   |           |           |          |
|---|-----------|-----------|----------|
| H | -1.259010 | -2.337770 | 0.000000 |
| C | -1.170874 | -1.252946 | 0.000000 |
| C | -0.936654 | 1.478071  | 0.000000 |
| C | 0.119703  | -0.657609 | 0.000000 |
| C | -2.345025 | -0.482839 | 0.000000 |
| C | -2.060416 | 0.893559  | 0.000000 |
| C | 0.266972  | 0.776461  | 0.000000 |
| H | -3.330174 | -0.935510 | 0.000000 |
| C | 1.455039  | -1.182887 | 0.000000 |
| H | 1.747955  | -2.224326 | 0.000000 |
| C | 2.324805  | -0.110451 | 0.000000 |
| H | 3.405970  | -0.090142 | 0.000000 |
| N | 1.602751  | 1.069597  | 0.000000 |
| H | 1.994970  | 1.999443  | 0.000000 |

SI-12a\*

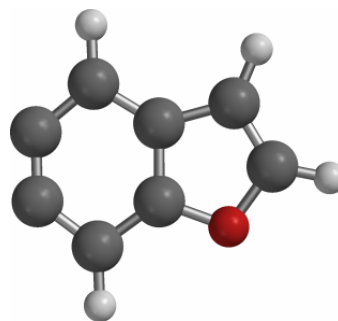

|   |           |           |          |
|---|-----------|-----------|----------|
| H | -0.973159 | -2.574842 | 0.000000 |
| C | -1.018788 | -1.491162 | 0.000000 |
| C | -1.095411 | 1.500382  | 0.000000 |
| C | 0.123672  | -0.665019 | 0.000000 |
| C | -2.129972 | -0.660314 | 0.000000 |
| C | -2.163302 | 0.611447  | 0.000000 |
| C | 0.119769  | 0.768247  | 0.000000 |
| H | -1.138312 | 2.584851  | 0.000000 |
| C | 1.513766  | 1.140019  | 0.000000 |
| H | 1.936440  | 2.134983  | 0.000000 |
| C | 2.218679  | -0.027614 | 0.000000 |
| H | 3.278937  | -0.237315 | 0.000000 |
| O | 1.407893  | -1.131095 | 0.000000 |

SI-11a\*

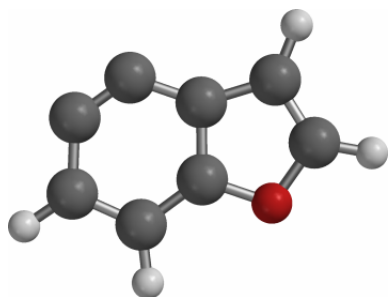

|   |           |           |          |
|---|-----------|-----------|----------|
| H | -1.105081 | -2.329196 | 0.000000 |
| C | -1.102180 | -1.242791 | 0.000000 |
| C | -0.986213 | 1.481815  | 0.000000 |
| C | 0.124020  | -0.543814 | 0.000000 |
| C | -2.307284 | -0.523902 | 0.000000 |
| C | -2.093011 | 0.867931  | 0.000000 |
| C | 0.273740  | 0.873708  | 0.000000 |
| H | -3.270694 | -1.021870 | 0.000000 |
| C | 1.683219  | 1.126181  | 0.000000 |
| H | 2.196313  | 2.076868  | 0.000000 |
| C | 2.269651  | -0.111249 | 0.000000 |
| H | 3.303779  | -0.423737 | 0.000000 |
| O | 1.357223  | -1.128504 | 0.000000 |

SI-13a\*

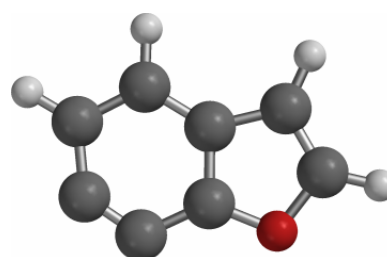

|   |           |           |          |
|---|-----------|-----------|----------|
| C | -0.896820 | -1.478191 | 0.000000 |
| C | -1.151104 | 1.261912  | 0.000000 |
| C | 0.284049  | -0.751600 | 0.000000 |
| C | -2.020276 | -0.891836 | 0.000000 |
| C | -2.318711 | 0.478284  | 0.000000 |
| C | 0.136039  | 0.665227  | 0.000000 |
| H | -3.308171 | 0.921059  | 0.000000 |
| H | -1.245882 | 2.345631  | 0.000000 |
| C | 1.490409  | 1.159138  | 0.000000 |
| H | 1.826877  | 2.186818  | 0.000000 |
| C | 2.299501  | 0.058377  | 0.000000 |
| H | 3.372754  | -0.060738 | 0.000000 |
| O | 1.585734  | -1.115961 | 0.000000 |

SI-31a\*

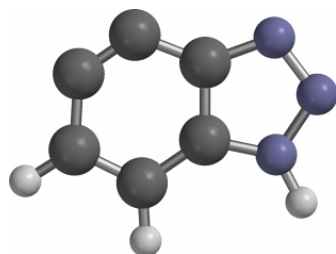

|   |           |           |          |
|---|-----------|-----------|----------|
| C | -0.913376 | -1.477150 | 0.000000 |
| C | -1.093507 | 1.268670  | 0.000000 |
| C | 0.324504  | -0.823447 | 0.000000 |
| C | -2.027782 | -0.880182 | 0.000000 |
| C | -2.270439 | 0.510391  | 0.000000 |
| C | 0.158275  | 0.601221  | 0.000000 |
| H | -3.246350 | 0.983750  | 0.000000 |
| H | -1.150680 | 2.354092  | 0.000000 |
| N | 1.451273  | 1.027528  | 0.000000 |
| H | 1.823373  | 1.968253  | 0.000000 |
| N | 2.328951  | -0.003880 | 0.000000 |
| N | 1.648499  | -1.137545 | 0.000000 |

SI-33a\*

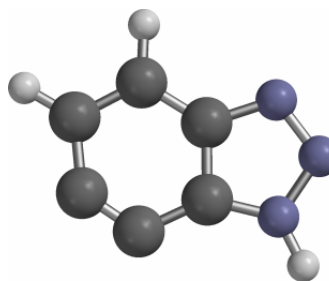

|   |           |           |          |
|---|-----------|-----------|----------|
| H | -1.201197 | -2.336667 | 0.000000 |
| C | -1.135608 | -1.252019 | 0.000000 |
| C | -0.901296 | 1.502667  | 0.000000 |
| C | 0.144137  | -0.630327 | 0.000000 |
| C | -2.299537 | -0.477030 | 0.000000 |
| C | -2.016859 | 0.905361  | 0.000000 |
| C | 0.296359  | 0.791082  | 0.000000 |
| H | -3.287641 | -0.922675 | 0.000000 |
| N | 1.638947  | 0.968889  | 0.000000 |
| H | 2.181486  | 1.822447  | 0.000000 |
| N | 2.291255  | -0.225323 | 0.000000 |
| N | 1.395507  | -1.191910 | 0.000000 |

SI-32a\*

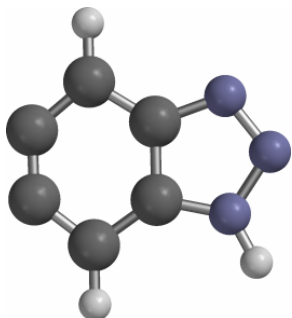

|   |           |           |          |
|---|-----------|-----------|----------|
| H | -1.073464 | -2.576054 | 0.000000 |
| C | -1.064525 | -1.491452 | 0.000000 |
| C | -1.021734 | 1.518893  | 0.000000 |
| C | 0.137880  | -0.729426 | 0.000000 |
| C | -2.132250 | -0.612026 | 0.000000 |
| C | -2.106075 | 0.661376  | 0.000000 |
| C | 0.143244  | 0.707793  | 0.000000 |
| H | -1.019213 | 2.603821  | 0.000000 |
| N | 1.479171  | 0.989407  | 0.000000 |
| H | 1.949035  | 1.884334  | 0.000000 |
| N | 2.237014  | -0.135338 | 0.000000 |
| N | 1.437344  | -1.177655 | 0.000000 |

SI-83a\*

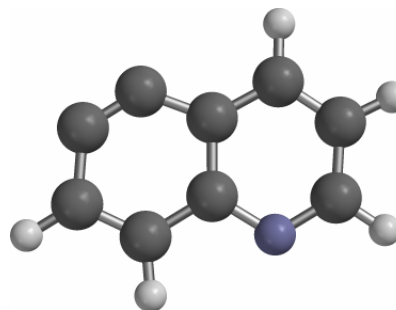

|   |           |           |          |
|---|-----------|-----------|----------|
| H | 3.421433  | -0.957880 | 0.000000 |
| C | 2.406995  | -0.569440 | 0.000000 |
| H | 1.436229  | -2.503503 | 0.000000 |
| C | 1.317640  | -1.423601 | 0.000000 |
| N | 0.994543  | 1.407233  | 0.000000 |
| C | 0.027077  | -0.855059 | 0.000000 |
| C | 2.191393  | 0.828622  | 0.000000 |
| C | -0.103163 | 0.595836  | 0.000000 |
| C | -1.245972 | -1.453111 | 0.000000 |
| H | 3.044536  | 1.505292  | 0.000000 |
| H | -1.395189 | 2.319465  | 0.000000 |
| C | -2.365266 | -0.868662 | 0.000000 |
| C | -2.591561 | 0.526041  | 0.000000 |
| H | -3.559658 | 1.015866  | 0.000000 |
| C | -1.392749 | 1.232205  | 0.000000 |

SI-84a\*

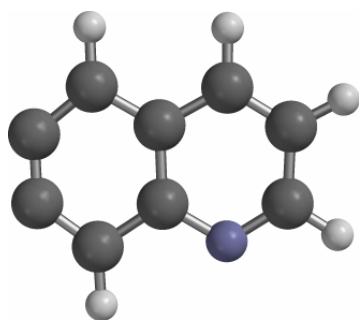

|   |           |           |          |
|---|-----------|-----------|----------|
| H | 3.271940  | -1.131364 | 0.000000 |
| C | 2.296301  | -0.653846 | 0.000000 |
| H | 1.171091  | -2.487769 | 0.000000 |
| C | 1.138790  | -1.400146 | 0.000000 |
| N | 1.063535  | 1.436021  | 0.000000 |
| C | -0.122730 | -0.739851 | 0.000000 |
| C | 2.203460  | 0.763489  | 0.000000 |
| C | -0.102404 | 0.714074  | 0.000000 |
| C | -1.348082 | -1.480392 | 0.000000 |
| H | 3.111857  | 1.364588  | 0.000000 |
| H | -1.280325 | 2.562548  | 0.000000 |
| C | -2.433026 | -0.628221 | 0.000000 |
| H | -1.358860 | -2.566998 | 0.000000 |
| C | -2.412234 | 0.644608  | 0.000000 |
| C | -1.318389 | 1.478045  | 0.000000 |

SI-85a\*

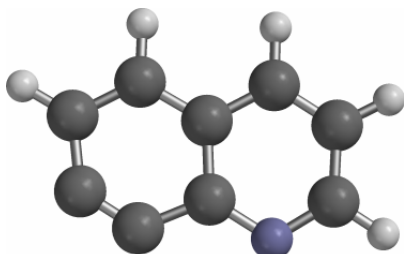

|   |           |           |          |
|---|-----------|-----------|----------|
| H | 3.231628  | -1.302361 | 0.000000 |
| C | 2.302512  | -0.739726 | 0.000000 |
| H | 1.022397  | -2.472204 | 0.000000 |
| C | 1.078975  | -1.385641 | 0.000000 |
| N | 1.259351  | 1.451574  | 0.000000 |
| C | -0.112960 | -0.618255 | 0.000000 |
| C | 2.338649  | 0.673235  | 0.000000 |
| C | 0.057759  | 0.829482  | 0.000000 |
| C | -1.410175 | -1.233477 | 0.000000 |
| H | 3.296602  | 1.190828  | 0.000000 |
| C | -2.592907 | -0.496279 | 0.000000 |
| H | -1.462199 | -2.321059 | 0.000000 |
| H | -3.571682 | -0.964076 | 0.000000 |
| C | -2.322568 | 0.883278  | 0.000000 |
| C | -1.203254 | 1.468255  | 0.000000 |

SI-103a\*

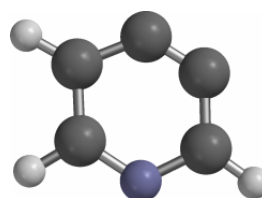

|   |           |           |          |
|---|-----------|-----------|----------|
| C | 0.720372  | -1.205981 | 0.000000 |
| C | -0.692436 | 1.009838  | 0.000000 |
| C | 1.419443  | 0.009475  | 0.000000 |
| C | -0.553363 | -1.275485 | 0.000000 |
| C | -1.430351 | -0.204442 | 0.000000 |
| N | 0.646363  | 1.112700  | 0.000000 |
| H | 2.496415  | 0.135423  | 0.000000 |
| H | -2.514834 | -0.214756 | 0.000000 |
| H | -1.241121 | 1.949351  | 0.000000 |

SI-104a\*

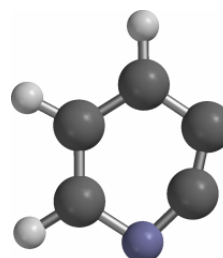

|   |           |           |          |
|---|-----------|-----------|----------|
| C | 0.135020  | -1.467994 | 0.000000 |
| C | -0.350629 | 1.225328  | 0.000000 |
| C | -0.936113 | -0.793948 | 0.000000 |
| C | 1.272209  | -0.633738 | 0.000000 |
| C | 0.972203  | 0.753169  | 0.000000 |
| N | -1.454912 | 0.385054  | 0.000000 |
| H | 2.299871  | -0.990614 | 0.000000 |
| H | 1.778153  | 1.481743  | 0.000000 |
| H | -0.578136 | 2.287527  | 0.000000 |

SI-106a\*

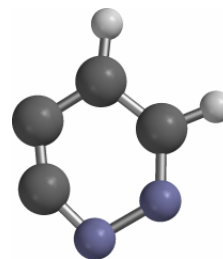

|   |           |           |          |
|---|-----------|-----------|----------|
| C | 0.116289  | -1.404991 | 0.000000 |
| N | -0.306056 | 1.273672  | 0.000000 |
| C | -0.985167 | -0.774865 | 0.000000 |
| C | 1.271576  | -0.636403 | 0.000000 |
| C | 0.925752  | 0.751779  | 0.000000 |
| N | -1.438324 | 0.454903  | 0.000000 |
| H | 2.303124  | -0.977847 | 0.000000 |
| H | 1.709926  | 1.505030  | 0.000000 |

**SI-108a\***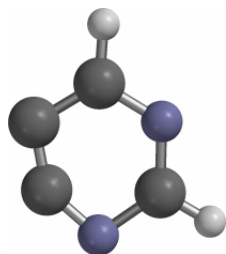

|   |           |           |          |
|---|-----------|-----------|----------|
| N | 1.465652  | -0.143376 | 0.000000 |
| C | -1.319474 | 0.349505  | 0.000000 |
| C | 0.472197  | -1.133533 | 0.000000 |
| C | 0.803134  | 0.955331  | 0.000000 |
| C | -0.388384 | 1.408787  | 0.000000 |
| N | -0.834596 | -0.919175 | 0.000000 |
| H | 0.841244  | -2.153556 | 0.000000 |
| H | -2.399040 | 0.468337  | 0.000000 |

**SI-110a\***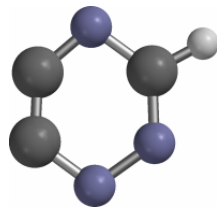

|   |           |           |          |
|---|-----------|-----------|----------|
| N | -0.553603 | -1.111942 | 0.000000 |
| N | -1.464305 | -0.101897 | 0.000000 |
| C | -0.791759 | 1.091335  | 0.000000 |
| C | 0.483504  | 1.190622  | 0.000000 |
| N | 1.440891  | 0.305620  | 0.000000 |
| C | 0.763208  | -0.916136 | 0.000000 |
| H | 1.387129  | -1.804126 | 0.000000 |

**SI-111a\***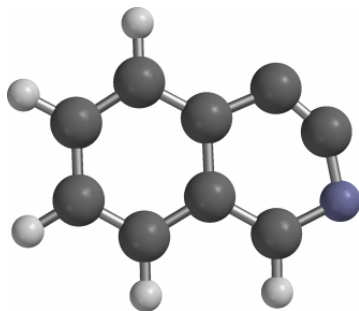

|   |           |           |          |
|---|-----------|-----------|----------|
| C | 2.313636  | 0.660771  | 0.000000 |
| C | 1.330865  | 1.440043  | 0.000000 |
| C | 1.413085  | -1.260175 | 0.000000 |
| C | 0.039197  | 0.848811  | 0.000000 |
| N | 2.612585  | -0.626030 | 0.000000 |
| C | 0.137727  | -0.605264 | 0.000000 |
| C | -1.232564 | 1.467718  | 0.000000 |
| H | -1.007371 | -2.452983 | 0.000000 |
| H | 1.454495  | -2.348756 | 0.000000 |
| C | -2.375583 | 0.684366  | 0.000000 |
| H | -1.292316 | 2.552363  | 0.000000 |
| H | -3.352529 | 1.161111  | 0.000000 |
| C | -2.292690 | -0.730434 | 0.000000 |
| H | -3.205492 | -1.319810 | 0.000000 |
| C | -1.063709 | -1.366442 | 0.000000 |

**SI-112a\***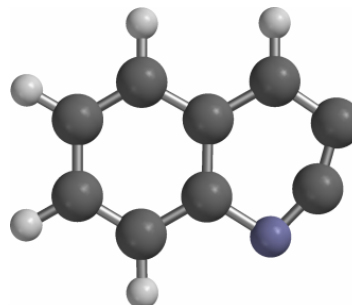

|   |           |           |          |
|---|-----------|-----------|----------|
| C | 2.559472  | 0.680603  | 0.000000 |
| H | 1.355381  | 2.526840  | 0.000000 |
| C | 1.378479  | 1.435928  | 0.000000 |
| N | 1.353781  | -1.468484 | 0.000000 |
| C | 0.135125  | 0.703528  | 0.000000 |
| C | 2.230093  | -0.557601 | 0.000000 |
| C | 0.135237  | -0.740320 | 0.000000 |
| C | -1.122501 | 1.367243  | 0.000000 |
| H | -1.038336 | -2.544504 | 0.000000 |
| C | -2.303566 | 0.646255  | 0.000000 |
| H | -1.139870 | 2.455055  | 0.000000 |
| H | -3.255904 | 1.169344  | 0.000000 |
| C | -2.281831 | -0.769603 | 0.000000 |
| H | -3.217376 | -1.322625 | 0.000000 |
| C | -1.079991 | -1.459180 | 0.000000 |

**SI-113a\***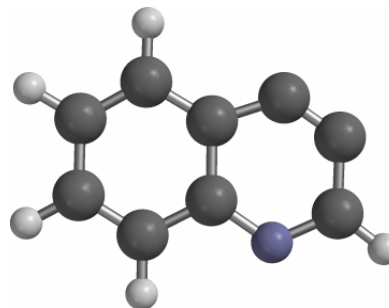

|   |           |           |          |
|---|-----------|-----------|----------|
| C | 2.387743  | 0.846186  | 0.000000 |
| C | 1.269259  | 1.447167  | 0.000000 |
| N | 1.369392  | -1.246593 | 0.000000 |
| C | -0.001107 | 0.855399  | 0.000000 |
| C | 2.512557  | -0.566988 | 0.000000 |
| C | 0.163566  | -0.605221 | 0.000000 |
| C | -1.291629 | 1.427268  | 0.000000 |
| H | 3.445267  | -1.121979 | 0.000000 |
| H | -0.901839 | -2.475411 | 0.000000 |
| C | -2.407064 | 0.603023  | 0.000000 |
| H | -1.390727 | 2.508678  | 0.000000 |
| H | -3.399898 | 1.045094  | 0.000000 |
| C | -2.268782 | -0.803997 | 0.000000 |
| H | -3.156789 | -1.430226 | 0.000000 |
| C | -1.015740 | -1.395200 | 0.000000 |

SI-115a\*

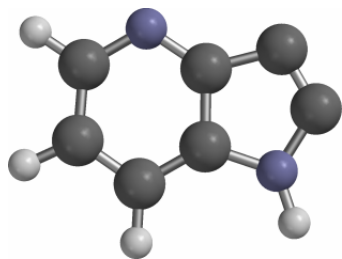

|   |           |           |          |
|---|-----------|-----------|----------|
| C | 0.339501  | -0.645280 | 0.000000 |
| C | -1.975627 | 0.767295  | 0.000000 |
| C | 0.293755  | 0.803030  | 0.000000 |
| C | -0.841026 | -1.390373 | 0.000000 |
| C | -2.019945 | -0.643443 | 0.000000 |
| N | -0.850809 | 1.495921  | 0.000000 |
| H | -0.848762 | -2.477507 | 0.000000 |
| H | -2.983790 | -1.144200 | 0.000000 |
| H | -2.905685 | 1.331565  | 0.000000 |
| C | 1.685243  | 1.230281  | 0.000000 |
| C | 2.367229  | 0.149794  | 0.000000 |
| N | 1.688761  | -1.035476 | 0.000000 |
| H | 2.048323  | -1.978288 | 0.000000 |

SI-117a\*

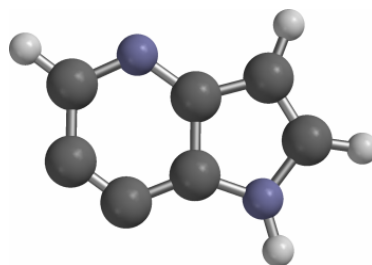

|   |           |           |          |
|---|-----------|-----------|----------|
| C | 2.227114  | 0.608530  | 0.000000 |
| H | 3.161511  | 1.158031  | 0.000000 |
| N | 1.079066  | 1.297159  | 0.000000 |
| C | 2.096149  | -0.803775 | 0.000000 |
| C | 0.990197  | -1.437886 | 0.000000 |
| C | -0.238209 | -0.800630 | 0.000000 |
| C | -0.101773 | 0.650291  | 0.000000 |
| N | -1.566641 | -1.096900 | 0.000000 |
| H | -1.956691 | -2.028009 | 0.000000 |
| C | -2.295909 | 0.082665  | 0.000000 |
| H | -3.376584 | 0.051842  | 0.000000 |
| C | -1.438624 | 1.162726  | 0.000000 |
| H | -1.726304 | 2.204595  | 0.000000 |

SI-116a\*

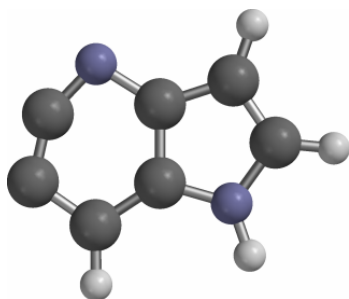

|   |           |           |          |
|---|-----------|-----------|----------|
| C | 1.964899  | 0.583518  | 0.000000 |
| N | 1.080439  | 1.510583  | 0.000000 |
| C | 2.233267  | -0.660412 | 0.000000 |
| C | 1.073369  | -1.452255 | 0.000000 |
| H | 1.053328  | -2.541814 | 0.000000 |
| C | -0.113156 | -0.669789 | 0.000000 |
| C | -0.107234 | 0.776461  | 0.000000 |
| N | -1.438175 | -1.041106 | 0.000000 |
| H | -1.774655 | -1.992626 | 0.000000 |
| C | -2.241381 | 0.079094  | 0.000000 |
| H | -3.318948 | -0.019585 | 0.000000 |
| C | -1.458501 | 1.219590  | 0.000000 |
| H | -1.809382 | 2.241414  | 0.000000 |

SI-119a\*

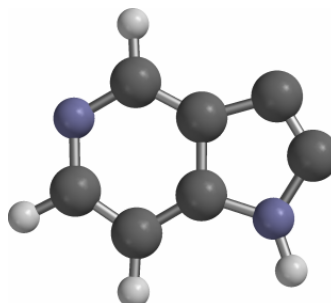

|   |           |           |          |
|---|-----------|-----------|----------|
| H | -0.875642 | -2.457044 | 0.000000 |
| C | -0.842816 | -1.371005 | 0.000000 |
| C | -0.929439 | 1.430638  | 0.000000 |
| C | -2.014587 | -0.614071 | 0.000000 |
| C | 0.349019  | -0.641983 | 0.000000 |
| C | 0.324532  | 0.799123  | 0.000000 |
| N | -2.074865 | 0.741562  | 0.000000 |
| H | -2.976684 | -1.121289 | 0.000000 |
| H | -1.004885 | 2.516171  | 0.000000 |
| N | 1.694695  | -1.045108 | 0.000000 |
| H | 2.043104  | -1.991876 | 0.000000 |
| C | 1.713309  | 1.207976  | 0.000000 |
| C | 2.398679  | 0.126631  | 0.000000 |

SI-120a\*

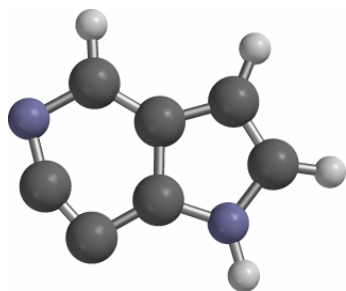

|   |           |           |          |
|---|-----------|-----------|----------|
| C | 1.923626  | 0.652281  | 0.000000 |
| C | 1.012432  | 1.538231  | 0.000000 |
| C | -0.175711 | 0.771799  | 0.000000 |
| C | -0.114805 | -0.679367 | 0.000000 |
| N | -1.500685 | 1.116324  | 0.000000 |
| H | -1.843766 | 2.066538  | 0.000000 |
| C | -2.278940 | -0.028079 | 0.000000 |
| H | -3.358300 | 0.045164  | 0.000000 |
| C | -1.471902 | -1.145869 | 0.000000 |
| H | -1.817990 | -2.170319 | 0.000000 |
| N | 2.309546  | -0.568439 | 0.000000 |
| C | 1.143764  | -1.311100 | 0.000000 |
| H | 1.269194  | -2.389815 | 0.000000 |

SI-123a\*

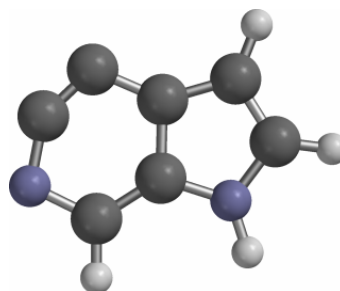

|   |           |           |          |
|---|-----------|-----------|----------|
| C | 1.096523  | -1.295296 | 0.000000 |
| H | 1.127091  | -2.382711 | 0.000000 |
| C | -0.116729 | -0.577537 | 0.000000 |
| C | -0.192119 | 0.873926  | 0.000000 |
| N | -1.416476 | -1.032021 | 0.000000 |
| H | -1.701775 | -2.000517 | 0.000000 |
| C | -2.279985 | 0.039551  | 0.000000 |
| H | -3.349743 | -0.123899 | 0.000000 |
| C | -1.569467 | 1.228271  | 0.000000 |
| H | -1.995981 | 2.221253  | 0.000000 |
| N | 2.309556  | -0.657472 | 0.000000 |
| C | 2.028537  | 0.623251  | 0.000000 |
| C | 1.093835  | 1.463752  | 0.000000 |

SI-122a\*

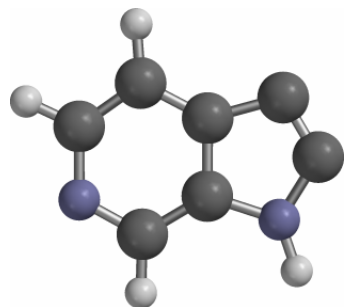

|   |           |           |          |
|---|-----------|-----------|----------|
| C | 0.358726  | -0.619923 | 0.000000 |
| C | -2.050679 | 0.608652  | 0.000000 |
| C | -0.829110 | -1.361651 | 0.000000 |
| C | 0.329000  | 0.821428  | 0.000000 |
| C | -0.930480 | 1.438626  | 0.000000 |
| N | -2.017738 | -0.749083 | 0.000000 |
| H | -0.830145 | -2.451092 | 0.000000 |
| H | -1.035486 | 2.519462  | 0.000000 |
| H | -3.046449 | 1.044968  | 0.000000 |
| N | 1.706076  | -1.023635 | 0.000000 |
| H | 2.058136  | -1.968995 | 0.000000 |
| C | 2.397229  | 0.153588  | 0.000000 |
| C | 1.717989  | 1.236988  | 0.000000 |

SI-125a\*

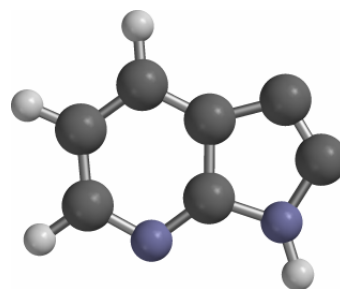

|   |           |           |          |
|---|-----------|-----------|----------|
| C | 0.326964  | -0.849598 | 0.000000 |
| C | -1.907761 | 0.765937  | 0.000000 |
| C | 0.330703  | 0.601813  | 0.000000 |
| C | -0.929403 | -1.468649 | 0.000000 |
| C | -2.051332 | -0.635459 | 0.000000 |
| N | -0.720867 | 1.400043  | 0.000000 |
| H | -1.025282 | -2.550686 | 0.000000 |
| H | -3.050213 | -1.061537 | 0.000000 |
| H | -2.787586 | 1.404781  | 0.000000 |
| N | 1.676493  | 1.029401  | 0.000000 |
| H | 1.987162  | 1.990044  | 0.000000 |
| C | 1.718735  | -1.224950 | 0.000000 |
| C | 2.389949  | -0.132106 | 0.000000 |



SI-126a\*

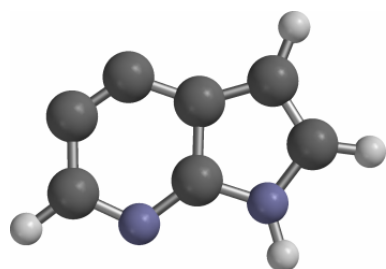

|   |           |           |          |
|---|-----------|-----------|----------|
| C | -0.101158 | -0.556541 | 0.000000 |
| C | -0.236517 | 0.893445  | 0.000000 |
| N | -1.381237 | -1.056939 | 0.000000 |
| H | -1.601647 | -2.042830 | 0.000000 |
| C | -2.287217 | -0.024904 | 0.000000 |
| H | -3.349536 | -0.227992 | 0.000000 |
| C | -1.624114 | 1.193525  | 0.000000 |
| H | -2.089121 | 2.168722  | 0.000000 |
| N | 1.018753  | -1.289380 | 0.000000 |
| C | 2.198855  | -0.647804 | 0.000000 |
| H | 3.103411  | -1.245595 | 0.000000 |
| C | 2.135617  | 0.766700  | 0.000000 |
| C | 1.048834  | 1.427351  | 0.000000 |

SI-128a\*

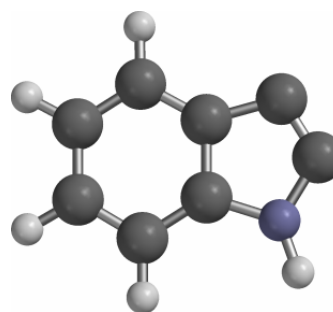

|   |           |           |          |
|---|-----------|-----------|----------|
| H | -0.933889 | -2.564080 | 0.000000 |
| C | -0.897625 | -1.478386 | 0.000000 |
| C | -0.819670 | 1.394956  | 0.000000 |
| C | 0.338848  | -0.810885 | 0.000000 |
| C | -2.066322 | -0.717527 | 0.000000 |
| C | -2.027640 | 0.694917  | 0.000000 |
| C | 0.355385  | 0.635061  | 0.000000 |
| H | -3.030038 | -1.219395 | 0.000000 |
| H | -2.960614 | 1.252197  | 0.000000 |
| H | -0.798664 | 2.482052  | 0.000000 |
| C | 1.734484  | -1.207420 | 0.000000 |
| C | 2.410577  | -0.121711 | 0.000000 |
| N | 1.703584  | 1.046185  | 0.000000 |
| H | 2.045310  | 1.994945  | 0.000000 |

SI-127a\*

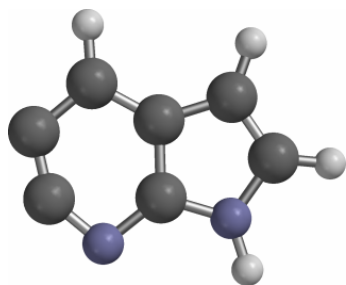

|   |           |           |          |
|---|-----------|-----------|----------|
| C | 2.227482  | 0.595052  | 0.000000 |
| C | 1.128109  | 1.462288  | 0.000000 |
| H | 1.170424  | 2.549295  | 0.000000 |
| C | -0.104181 | 0.749269  | 0.000000 |
| C | -0.095467 | -0.696466 | 0.000000 |
| N | 1.008040  | -1.511833 | 0.000000 |
| C | 1.984373  | -0.651225 | 0.000000 |
| N | -1.394091 | -1.123111 | 0.000000 |
| H | -1.672748 | -2.093866 | 0.000000 |
| C | -1.487448 | 1.133359  | 0.000000 |
| H | -1.884714 | 2.139000  | 0.000000 |
| C | -2.235586 | -0.025560 | 0.000000 |
| H | -3.309066 | -0.159572 | 0.000000 |

SI-129a\*

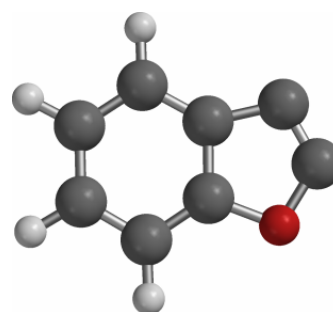

|   |           |           |          |
|---|-----------|-----------|----------|
| H | -0.744388 | -2.485643 | 0.000000 |
| C | -0.792873 | -1.400958 | 0.000000 |
| C | -0.887028 | 1.477231  | 0.000000 |
| C | 0.357652  | -0.623360 | 0.000000 |
| C | -2.007278 | -0.705190 | 0.000000 |
| C | -2.051374 | 0.704244  | 0.000000 |
| C | 0.346577  | 0.812714  | 0.000000 |
| H | -2.937243 | -1.266587 | 0.000000 |
| H | -3.017417 | 1.201214  | 0.000000 |
| H | -0.930789 | 2.562182  | 0.000000 |
| C | 1.756524  | 1.142899  | 0.000000 |
| C | 2.385669  | 0.032249  | 0.000000 |
| O | 1.676489  | -1.116267 | 0.000000 |

SI-130a\*

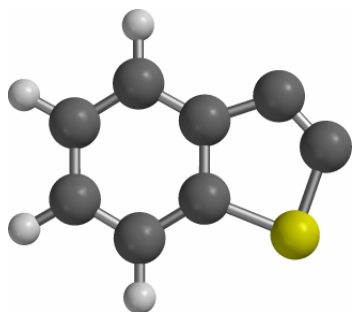

|   |           |           |          |
|---|-----------|-----------|----------|
| H | -0.701994 | -2.495391 | 0.000000 |
| C | -0.898957 | -1.425824 | 0.000000 |
| C | -1.429957 | 1.376086  | 0.000000 |
| C | 0.149530  | -0.498081 | 0.000000 |
| C | -2.206906 | -0.938955 | 0.000000 |
| C | -2.468500 | 0.446534  | 0.000000 |
| C | -0.100437 | 0.917449  | 0.000000 |
| H | -3.036096 | -1.641210 | 0.000000 |
| H | -3.497980 | 0.793908  | 0.000000 |
| H | -1.633123 | 2.443190  | 0.000000 |
| C | 1.170505  | 1.598036  | 0.000000 |
| C | 2.178771  | 0.830331  | 0.000000 |
| S | 1.905277  | -0.856389 | 0.000000 |

SI-142a\*

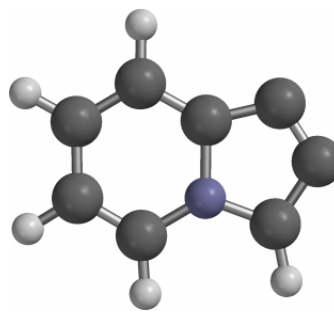

|   |           |           |          |
|---|-----------|-----------|----------|
| C | 2.040303  | 0.767700  | 0.000000 |
| H | 2.991109  | 1.290797  | 0.000000 |
| C | 0.851901  | 1.481949  | 0.000000 |
| H | 0.843259  | 2.567895  | 0.000000 |
| C | 2.008893  | -0.651487 | 0.000000 |
| H | 2.929785  | -1.225743 | 0.000000 |
| C | 0.817353  | -1.337752 | 0.000000 |
| H | 0.737662  | -2.419914 | 0.000000 |
| N | -0.369870 | -0.637245 | 0.000000 |
| C | -0.378858 | 0.807369  | 0.000000 |
| C | -1.751894 | 1.130502  | 0.000000 |
| C | -2.456193 | 0.054424  | 0.000000 |
| C | -1.677040 | -1.112596 | 0.000000 |
| H | -1.892243 | -2.170393 | 0.000000 |

SI-132a\*

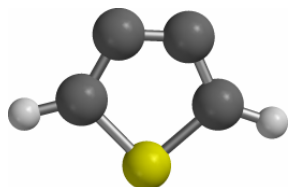

|   |           |          |           |
|---|-----------|----------|-----------|
| C | 0.643328  | 0.000000 | 1.410770  |
| C | 1.264269  | 0.000000 | 0.177883  |
| H | 2.302155  | 0.000000 | -0.127276 |
| C | -0.643328 | 0.000000 | 1.410770  |
| C | -1.264269 | 0.000000 | 0.177883  |
| H | -2.302155 | 0.000000 | -0.127276 |
| S | 0.000000  | 0.000000 | -1.014694 |

SI-143a\*

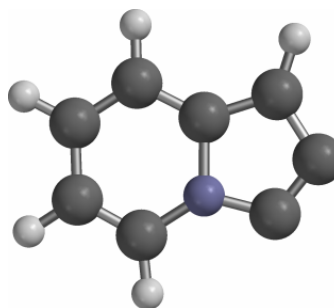

|   |           |           |          |
|---|-----------|-----------|----------|
| C | 2.018661  | 0.718914  | 0.000000 |
| H | 2.955915  | 1.266879  | 0.000000 |
| C | 0.820342  | 1.405727  | 0.000000 |
| H | 0.794138  | 2.492365  | 0.000000 |
| C | 2.035441  | -0.706668 | 0.000000 |
| H | 2.973185  | -1.251668 | 0.000000 |
| C | 0.865630  | -1.422738 | 0.000000 |
| H | 0.805843  | -2.505168 | 0.000000 |
| N | -0.333289 | -0.746396 | 0.000000 |
| C | -0.405677 | 0.700345  | 0.000000 |
| C | -1.782661 | 1.059324  | 0.000000 |
| H | -2.161172 | 2.072665  | 0.000000 |
| C | -2.482012 | -0.178761 | 0.000000 |
| C | -1.631025 | -1.145795 | 0.000000 |

SI-133a\*

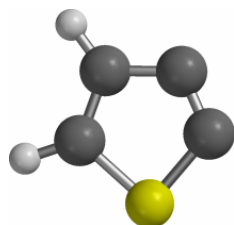

|   |           |           |          |
|---|-----------|-----------|----------|
| C | 1.126355  | 0.979625  | 0.000000 |
| C | -0.113978 | 1.256184  | 0.000000 |
| C | 1.426462  | -0.419338 | 0.000000 |
| H | 2.405041  | -0.884052 | 0.000000 |
| C | 0.234712  | -1.133671 | 0.000000 |
| H | 0.101862  | -2.211987 | 0.000000 |
| S | -1.170022 | -0.072095 | 0.000000 |

**SI-148a\***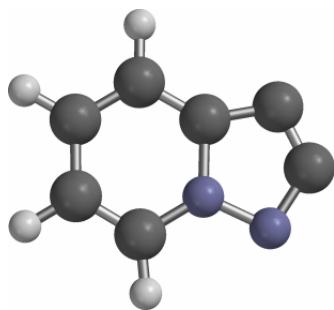

|   |           |           |          |
|---|-----------|-----------|----------|
| C | 2.016063  | 0.767368  | 0.000000 |
| H | 2.966859  | 1.291021  | 0.000000 |
| C | 0.832657  | 1.487707  | 0.000000 |
| H | 0.828809  | 2.573203  | 0.000000 |
| C | 1.993239  | -0.651057 | 0.000000 |
| H | 2.918422  | -1.217605 | 0.000000 |
| C | 0.804238  | -1.344729 | 0.000000 |
| H | 0.698460  | -2.423613 | 0.000000 |
| N | -0.366232 | -0.634173 | 0.000000 |
| C | -0.398933 | 0.808236  | 0.000000 |
| N | -1.616241 | -1.205113 | 0.000000 |
| C | -1.778426 | 1.071257  | 0.000000 |
| C | -2.364607 | -0.070192 | 0.000000 |

**SI-157a\***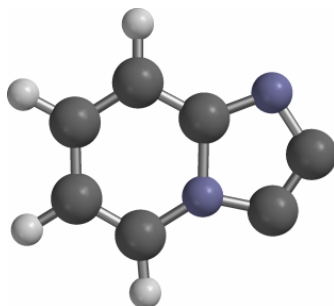

|   |           |           |          |
|---|-----------|-----------|----------|
| C | 1.986440  | 0.728046  | 0.000000 |
| H | 2.920064  | 1.282038  | 0.000000 |
| C | 0.784469  | 1.415969  | 0.000000 |
| H | 0.740797  | 2.500934  | 0.000000 |
| C | 2.016862  | -0.691191 | 0.000000 |
| H | 2.961397  | -1.224299 | 0.000000 |
| C | 0.854569  | -1.427706 | 0.000000 |
| H | 0.809038  | -2.510546 | 0.000000 |
| N | -0.340564 | -0.756495 | 0.000000 |
| C | -0.429480 | 0.704732  | 0.000000 |
| N | -1.722113 | 1.124117  | 0.000000 |
| C | -2.427041 | -0.062759 | 0.000000 |
| C | -1.653591 | -1.085462 | 0.000000 |

## References

- <sup>1</sup> *Spartan '06*; Wavefunction, Inc: Irvine, CA, 2006.
- <sup>2</sup> a) S. E. Wheeler, A. Moran, S. N. Pieniazek and K. N. Houk, *J. Phys. Chem. A* **2009**, *113*, 10376. b) S. Grimme, *WIREs Comput. Mol. Sci.* **2011**, *1*, 211.
- <sup>3</sup> *Spartan '10*; Wavefunction, Inc: Irvine, CA, 2010.
